# Supplementary material for: Robust single-nucleus RNA sequencing reveals depot-specific cell population dynamics in adipose tissue remodeling during obesity
Source: eLife. 2025 Jan 13;13:RP97981. doi: 10.7554/eLife.97981 (PMC11729396; doi:10.7554/eLife.97981)
Supplement: Supplementary file 1. — K-means clustering of differentially expressed genes (n = 4236) in at least one adipocyte subpopulation in either epididymal white adipose tissue (eWAT) or inguinal white adipose tissue (iWAT), based on their expression patterns across samples, results in four clusters. Each tab includes pathways enriched in each gene cluster, as determined by Metascape. Specific pathways highlighted in Figure 5 are marked with borders. [file elife-97981-supp1.xlsx]

## Sheet: DEG list
Cluster 1	Cluster 2	Cluster 3	Cluster 4		Cluster #	n
Xkr4	Rpl7	Lrrn2	Nxph1		1	890
Gm1992	Eloc	Esrrg	4921534H16Rik		2	2046
Gm19938	Cox5b	Grb14	Faiml		3	897
Rp1	Il1rl2	B3galt1	Gm31522		4	403
Gm29570	Col3a1	Hoxd3	Rgs2
Gm28376	Hecw2	Sptbn5	2310010J17Rik
Jph1	Hspd1	Snta1	B230118H07Rik
Pkhd1	Hspe1	Ctcflos	Mfap1b
Ankrd23	Ndufb3	Gm43445	Pheta1
Tmem182	Eef1b2	Frmpd1	Grid2
Tmeff2	Rpl37a	Gm12609	Usp18
Gm28320	Igfbp5	Gm44079	1700126G02Rik
Sgo2a	Pnkd	2310014F06Rik	Sox6os
Gm973	Chpf	AY074887	Ndel1
Fzd5	Itm2c	Gm28379	Rsad2
D630023F18Rik	Ptma	Pde7b	Glrx
Spag16	Cops9	Fbxw10	Pram1
Vwc2l	Gpc1	Gm12320	Tcirg1
Prkag3	Rnpepl1	Srcin1	Gsta3
Gm15179	Serpinb8	Klhl29	Gm29506
Speg	Nifk	Gm4117	Tsga10
Utp14b	Dbi	Nek10	Gulp1
Nyap2	Cd55	Olfr734	Inpp1
Pam	Plekha6	4930402D18Rik	Hibch
B230216N24Rik	Snrpe	2310068J16Rik	Plcl1
Gm28187	Phlda3	D430001F17Rik	Abi2
Lypd1	Fam129a	Adamts10	Pth2r
Nckap5	Arpc5	Taf4b	Erbb4
Thsd7b	Ier5	Gm5820	BC035947
Gm28856	Mrps14	C730002L08Rik	Mogat1
Pm20d1	Cacybp	Gm50337	Irs1
Optc	Prrx1	Myo1b	Cdh19
Pkp1	Dpt	Pygo1	3110009E18Rik
Nmnat2	Creg1	Zkscan17	Gm15675
Shcbp1l	Ildr2	Sox7	6030442K20Rik
Npl	Rgs5	Gnb4	Fmo4
Cacna1e	Ddr2	Cdk8	Fmo1
Dnm3os	Ndufs2	Pdk3	Opn3
Nos1ap	Pea15a	Sgk3	Chml
B930036N10Rik	Tagln2	Stau2	Gm31728
Casq1	Ifi207	Rims1	Plxdc2
Kif26b	Ifi204	Fam135a	Gm20539
Marc1	Mndal	Ptp4a1	Wdr5
Mark1	Ifi211	4931428L18Rik	Uck1
Dtl	Ifi203	Rev1	Nmi
Gm32250	Ifi205	Il1r1	Rif1
Cr2	Enah	Ercc5	Acvr1c
Mcm10	Srp9	Aox1	Chn1
4930551O13Rik	Degs1	Clk1	Pde11a
Itih5	Nenf	Pard3b	Osbpl6
Adamtsl2	Frmd4a	Akr1cl	Pde1a
Col5a1	Mrpl41	Myl1	Tfpi
Gm13402	Tubb4b	Ttll4	Slc43a1
Kyat1	Edf1	Cyp27a1	Pacsin3
Dpm2	Dnlz	Per2	Chst1
Rnd3	Rpl7a	Twist2	Mir670hg
Cacnb4	Surf4	Gli2	Prr5l
Itgb6	Ier5l	Sctr	Hipk3
Fap	1110008P14Rik	Mdm4	Sqor
Hoxd3os1	St6galnac6	Sox13	Adam33
Hoxd4	Eng	Ppp1r12b	Cdc25b
Gm13944	Rpl12	A830008E24Rik	Snap25
Gm13684	Hspa5	Rabgap1l	Kiz
1700029I15Rik	Gsn	Serpinc1	Thbd
Gm13814	Stom	Zbtb37	Pygb
Prdm11	Ndufa8	Dars2	Pck1
Tspan18	Rpl35	Gm38304	Dido1
Abtb2	Atp5g3	Pbx1	2700069I18Rik
Pax6os1	Fkbp7	Gm20045	Zfhx4
Bdnf	Serping1	Grem2	Gm16685
Gm13963	Psmc3	Sdccag8	Car1
Ccdc9b	Trp53i11	Gm26801	Car3
Knl1	Pamr1	Catspere1	Cp
Pla2g4e	Rcn1	Catspere2	Slc7a11
Duoxa1	Nop10	B230369F24Rik	Bche
Duox1	Emc7	Smyd3	Dcst2
Acoxl	Srp14	Cnst	Rorc
Slc20a1	Inafm2	Dusp10	Fmo5
9630028H03Rik	Pdia3	Ptpn14	Rsbn1
Gm14064	Serf2	Syt14	2010016I18Rik
Nol4l	B2m	A330023F24Rik	Dennd2d
Efcab8	Mtln	Cd46	Cept1
Acss2	Cenpb	Proser2	Dram2
Gssos1	Prnp	Celf2	Gm36211
Fam83d	Cd93	Taf3	Celsr2
Gm11457	Cst3	Gm13270	Elovl6
Neurl2	Srxn1	Pdss1	Sec24b
Ripor3	Tcf15	Abi1	Unc5c
Ctcfl	Id1	Ehmt1	Bmpr1b
Gnasas1	Raly	Snapc4	Kyat3
B230312C02Rik	Eif2s2	Ddx31	Gm42705
Stmn3	Map1lc3a	Abl1	Gm30382
Pkia	Ergic3	Dennd1a	Ifi44
Gm16093	Romo1	Mbd5	Ptgfr
Pex5l	Scand1	Gm13483	St6galnac5
4930419G24Rik	Rab5if	Gm13544	AI838599
Sox2ot	Ppp1r16b	Upp2	Plag1
Ccdc144b	Serinc3	Baz2b	Tox
Plk4	Sdc4	Fign	Gm11837
Trpc4	Ctsa	Cobll1	Bach2
P2ry14	Pltp	Scn7a	Elavl2
Aadacl2	Cebpb	Stk39	0610043K17Rik
Aadac	Ctsz	Ubr3	Podn
Kcnab1	Atp5e	Map3k20	Zyg11a
A330015K06Rik	Fam217b	Olfr1033	Gpbp1l1
Rxfp1	Psma7	Olfr1034	Mycl
Tmem144	Rps21	Gm13778	Sh3d21
Gm36569	Fabp4	Ttc17	Pum1
Gm16000	Rbis	Lrrc4c	Errfi1
Dclk2	Naaladl2	Mettl15	Prdm16
Fcrl5	Rpl22l1	BC052040	9330182L06Rik
S100a2	Mecom	Meis2	Sema3a
Hormad1	Ndufb5	Eif2ak4	Fam185a
Inka2	Anxa5	Disp2	Ppargc1a
Gm42836	Spry1	Dnajc17	Rassf6
Ugt8a	Ndufc1	Mga	Parm1
Sgms2	Lhfp	Mapkbp1	Gbp10
Ccn1	Ufm1	Capn3	Acacb
Gm17501	Tm4sf1	AV039307	Fbxo21
Ddah1	Serp1	Tmem62	AI480526
Mcoln2	Ssr3	Trp53bp1	Hcar1
Lpar3	Ptx3	Mertk	Por
Gipc2	Mfsd1	Zc3h6	Gm454
Nexn	Trim2	Gm14027	Usp42
Miga1	Arfip1	Gm14022	5930430L01Rik
Ptger3	Rps3a1	Pced1a	Pon1
Ankrd6	Nes	Adra1d	Cadps2
Rragd	Sema4a	Ankef1	Nrf1
Gm16731	Lmna	Macrod2	Ube2h
Col15a1	Scamp3	Kif16b	Agbl3
Tmem38b	Dpm3	Rin2	Kdm7a
Gm12511	She	Acss1	E330009J07Rik
Svep1	Rps27	a	Hoxa5
Zfp618	Slc39a1	5430405H02Rik	Hoxa7
Brinp1	S100a1	Gm14286	Herc6
Gm11250	S100a13	Snhg11	Fam13a
Gm11184	S100a16	Pabpc1l	BB365896
Gm12602	S100a6	Zmynd8	A430010J10Rik
Gm12796	S100a11	Gm14320	Elmod3
Dnajc6	S100a10	Tshz2	Paip2b
Glis1	Psmb4	Pmepa1os	Gm44386
Calr4	Lysmd1	Gm14412	1600020E01Rik
Zswim5	Cers2	Zfp970	Lrig1
Zfp69	Ctsk	Zbtb10	Chl1
C77080	Ecm1	Zfp704	Il17re
Gm12976	BC028528	Zfp267	Cand2
Gm12963	Sf3b4	Fgf2os	Phc1
Gm13008	Hist2h3c2	Fgf2	Slc2a3
E2f2	Ptgfrn	Spata5	9330179D12Rik
Asap3	Atp1a1	6430590A07Rik	2310001H17Rik
Ephb2	Ngf	D3Ertd751e	Dusp16
Igsf21	Olfml3	Foxo1	Cdkn1b
Draxin	Slc16a1	Nbea	Arntl2
Ube4bos1	Rhoc	Gm26671	Etfbkmt
Spsb1	Lamtor5	4930593A02Rik	Isoc2a
Tas1r1	Csf1	Med12l	Sbk2
Plch2	Gstm5	Fbxw7	Cyp2f2
Gm4128	Gstm2	Sh3d19	Gm15883
Cdk5	Gstm1	Lrba	4931406P16Rik
1500035N22Rik	S1pr1	Kirrel	Dbp
Zfyve28	Vcam1	Khdc4	Pcsk6
Gm15513	Tmem56	Gon4l	Igf1r
Cfap99	Cnn3	Dcst1	Ntrk3
Gm43016	1810037I17Rik	Adar	Hdgfl3
Nsun7	Rpl34	Prune1	Saxo2
Limch1	Bank1	Arnt	Slco2b1
Gm15478	Emcn	C920021L13Rik	Gm34280
Lnx1	H2afz	Trim33	Pold3
Adamts3	Dapp1	Magi3	Gm4070
Cfap299	Selenof	Dpyd	Gvin1
Bmp3	Gng5	Slc44a3	Pde3b
Rasgef1b	Adgrl4	A530020G20Rik	Gm44777
Tmem150c	Rps20	Ank2	Xylt1
Ccdc18	Runx1t1	Slc9b2	Acsm3
Gm35315	Tmem64	Clca3a1	Sult1a1
Pole	Smim27	Syde2	Slx1b
Sez6l	Ndufb6	Lrriq3	Ebf3
1700034G24Rik	Rpp25l	4930570G19Rik	Bnip3
1500011B03Rik	Dctn3	Negr1	Cyp2e1
Bicdl1	Sigmar1	Srsf11	Cracr2b
Gm13842	Tesk1	Fam110b	Bag4
Srrm4	Hint2	Chd7	Gsr
Ksr2	Clta	Asph	Gm16675
Cux2	Tomm5	Lrrc69	Irf2
Tctn1	Sec61b	Gm11867	Klhl2
Gm43409	Klf4	Ttpa	Zfp963
Lrrc43	Txn1	Pnisr	Zfp709
Tmem132b	Lpar1	Rngtt	Gpt2
Ssc4d	Gng10	Rmrp	Ces1d
Tfr2	Orm1	Reck	Ces1f
Gm36266	Atp6v1g1	Rnf38	Vat1l
Fam20c	Tnc	Zcchc7	4732419C18Rik
Sdk1	Rraga	Tmeff1	Pdgfd
Baiap2l1	Rps6	Cavin4	Bmper
Wdr95	Klhl9	Rnf20	Arhgap32
D730045B01Rik	Tek	Zfp462	St3gal4
1700028E10Rik	Leprot	Zkscan16	Mpzl2
Ppp1r3a	Scp2	Orm3	Pcsk7
Tes	Rnf11	Cdk5rap2	Il18
D830026I12Rik	Cyp4b1	Kdm4c	Gm16124
Cttnbp2	Uqcrh	Ptprd	Chrna5
Lrrc4	Akr1a1	Bnc2	Myo5c
Mest	Prdx1	Mllt3	Gsta4
Dgki	Urod	Focad	Irak1bp1
Atp6v0a4	Rps8	Mysm1	Gm48832
Gm16499	Elovl1	Fggy	Nmnat3
Gm15527	Ybx1	Nfia	Stag1
Gprin3	Ndufs5	Cachd1	Cish
Ccser1	Eif3i	Gm12729	Pth1r
Smyd1	Tinagl1	Ssbp3	Vnn3
Reep1	Snhg3	Gm12811	Vnn1
St3gal5	Atpif1	Faf1	Tpd52l1
Gm20560	Themis2	Trabd2b	Frk
M1ap	Sh3bgrl3	Ptch2	Cdk19
Dysf	Zfp593	Hivep3	Gstt1
2310040G24Rik	Man1c1	Kcnq4	Plppr3
Podxl2	Tmem50a	Gm12905	Prtn3
Cfap100	Rpl11	Zmym6	Cfd
Slc41a3	Cdc42	Hnrnpr	Gm15608
Nup210	Ddost	1700012P22Rik	Uhrf1bp1l
Slc6a6	Micos10	Rere	Socs2
Grip2	Efhd2	Per3	Tmtc2
Magi1	Tnfrsf1b	Tmem88b	Gm40761
Cntn4	Plod1	1700109H08Rik	Irak3
Fancd2	Rbp7	Gm30835	Slc16a7
Gm4651	Vamp3	6030443J06Rik	Gm12592
Slc6a13	Rpl22	5031425E22Rik	Ccm2
Gm44096	Tprgl	Srpk2	Ugp2
Cd4	Prxl2b	Klhl7	5730522E02Rik
Scnn1a	Rer1	Smarcd3	Slc22a21
Plekhg6	Mmp23	Prkag2	Cenpv
Cracr2a	Mrpl20	Lmbr1	Hs3st3b1
Olr1	Aurkaip1	Rbks	2810001G20Rik
Spx	C1qtnf12	Babam2	Spata22
Sox5os4	Isg15	Evc2	Ssh2
Sspnos	Gatad1	Tbc1d19	Aatf
Bicd1	Steap4	Pcdh7	Hlf
Nlrp12	Abcb1b	9130230L23Rik	Tbx21
Zim1	Snx17	Guf1	Mpp2
Peg3	Mrpl33	Scfd2	Mapt
Usp29	Ywhah	Kit	Polg2
Gm45509	Letm1	Gm34728	Abca8a
Spred3	Sh3bp2	Slc4a4	2610035D17Rik
Spint2	Grpel1	Btc	Tbc1d16
AC150683.1	Mrfap1	Art3	A930037H05Rik
1700008O03Rik	Wfs1	Gm8013	Sntg2
Trpm4	Cd38	Enoph1	Slc25a21
Nell1	Lap3	4930458D05Rik	Slc25a47
Gabrb3	Sod3	Gpat3	Net1
Atp10a	Rbpj	Arhgap24	Adarb2
A730056A06Rik	Rpl9	D930016D06Rik	Wdr37
Folh1	Pdgfra	Zfp951	Gmds
Gm44995	Kdr	Brdt	Slc22a23
Gm45012	Igfbp7	Btbd8	Eci3
Map6	Cxcl1	Glmn	Ofcc1
Tomt	Plac8	Gm10419	Gm47448
Olfr655	Sparcl1	Ift81	Sfxn1
Cckbr	Rpl5	Rhof	A530001N23Rik
Ampd3	Atp5k	Ccdc62	Mterf3
Mical2	Iscu	Slc15a4	Zfp712
Plekha7	Kctd10	Phkg1	Fcho2
Gm32916	Gltp	Auts2	Pik3r1
Gsg1l	Oasl2	Mlxipl	BC067074
4931431B13Rik	Mlec	Gm43091	Il17rb
Gm4265	Dynll1	Styxl1	Chdh
Tcerg1l	Cox6a1	Fbxo24	Ankrd28
Tnfrsf23	Rab35	A430033K04Rik	Peli2
Tpcn2	Plbd2	D130017N08Rik	4931414P19Rik
Gm15418	Rpl6	Gm17135	Gm49067
Gm15419	Sh2b3	Smurf1	Dleu2
Sox1ot	Vps29	B230303O12Rik	Kcnrg
Tdrp	Arpc3	Katnal1	Gm27010
Dlgap2	Orai1	Fry	Zfp395
Rab11fip1	Tmed2	Stard13	Ephx2
Gm26632	Ubc	Ppp1r9a	Ebf2
Gm9951	Mrps17	Gm20619	Gm36107
AI429214	Cct6a	Foxp2	Fgf14
Zdhhc2	Chchd2	Gm4876	Slc1a3
Sorbs2	Tpst1	Met	Adamts12
Cenpu	Lat2	Gm3289	Cdh9
Gpm6a	Mdh2	Cped1	Sema5a
Mfap3l	Hspb1	Smo	Angpt1
Palld	Cldn15	Strip2	Gm17473
Gm33103	Plod3	Lncpint	Enpp2
Slc18a1	Gnb2	2210408F21Rik	Gm26684
Gm45435	Pcolce	Chchd3	Fbxo32
Inpp4b	Cops6	Slc23a4	Myc
Cacna1a	Zfand2a	Cnot4	Ndrg1
Gm16183	Actb	D630045J12Rik	Tef
Nkd1	Fscn1	Ubn2	Slc2a13
Gnao1	Bri3	Luc7l2	Tmem117
Ccdc102a	Arpc1b	Hipk2	Lmbr1l
Pmfbp1	Atp5j2	Gm49041	Mettl7a1
Hydin	Rpl21	Tpk1	Vasn
1700030M09Rik	Polr1d	Zfp775	Igf2bp2
Gm45866	Flt1	5430402O13Rik	Fbxo45
Gm29773	Pomp	Hibadh	Slc15a2
Capn9	Slc7a1	Jazf1	Abi3bp
Gm26759	Medag	Creb5	St3gal6
Hephl1	Tfpi2	Inmt	Ncam2
Elavl3	Gng11	Mindy4	Bach1
Tmem45b	Col1a2	Avl9	Hunk
Cdon	Pdk4	Herc3	Eva1c
Olfr889	Sem1	A530053G22Rik	Ripk4
1700110K17Rik	Ndufa4	Tcf7l1	E430024P14Rik
Gm48293	Cav2	Hk2	Zfp53
Gm48742	Ndufa5	Zfp638	Srrm2
Grik4	Hilpda	Alms1	Meiob
Nxpe2	Atp6v1f	Mxd1	Fkbp5
Gm47077	Podxl	Gm5577	Zfp955b
Gm17231	1810058I24Rik	Eefsec	Prrt1
Rec114	Mrps33	Slc25a26	C2
Lctl	Gstk1	Eogt	Gabbr1
Gm48855	Zyx	Pdzrn3	Dlgap1
Dennd4a	Gimap6	Setd5	Ppm1b
Ankdd1a	Tmem176b	Vgll4	Socs5
Gm15563	Tmem176a	Pparg	Nrxn1
Car12	Mpp6	Tmcc1	Crem
4930502A04Rik	Osbpl3	Cacna1c	Gm10125
Prtg	Cycs	Dcp1b	Zeb1
Mlip	Aqp1	Erc1	Osbpl1a
Gm2087	Abcg2	Hdhd5	Gm49970
Sh3bgrl2	Igkc	Gm10069	Zfp521
Ube2cbp	Vamp8	Borcs5	Wdr36
Pgm3	Tgoln1	Gpr19	Cxxc5
Gm16126	Tmsb10	Gm36640	Tmco6
Il20rb	Mrpl19	Grin2b	Pcdhb14
Gm5627	Aup1	Plekha5	Gm4951
Dock3	Mrpl53	C2cd5	Gm4841
Pfkfb4	Wbp1	Sox5	Adrb2
Dclk3	Bola3	Ccdc91	Apcdd1
Acaa1b	Smyd5	Dennd5b	Gnal
Entpd3	Cct7	Prkcg	Pard6g
E530011L22Rik	Fam136a	Ccdc106	Dok6
B430219N15Rik	Snrpg	Hif3a	Ppp6r3
Grm1	Pcbp1	Mill2	Pacs1
Map7	Rpn1	Ceacam2	Rfx3
Eya4	Lsm3	Zfp60	Sh3pxd2a
Arhgap18	Sec13	Zfp59	Gfra1
Ptprk	Timp4	Zfp607a	Sfxn4
Nkain2	Rpl32	Hnrnpl	Wdr13
Gm47823	Cxcl12	Lgals4	Maob
Ccdc162	C1ra	Chst8	Usp11
Gm36827	C1s1	Uri1	Dock11
Dnajc12	Tpi1	Gm44767	Stag2
Ctnna3	Mlf2	Gm37494	Smim10l2a
Lrrtm3	Gapdh	AW146154	Ints6l
Ank3	Mrpl51	Gm44997	Mamld1
Gm867	Ltbr	Zfp976	Jpx
Gm16222	Tnfrsf1a	Sergef	Slc16a2
Sbno2	Gabarapl1	Gas2	Pcdh11x
Tmprss9	H2afj	Gabrg3	Cldn34c1
Atcay	Eps8	Gm38393	Plp1
Glt8d2	Strap	A230057D06Rik	Chrdl1
Gm38560	Mgst1	A330076H08Rik	9530051G07Rik
Anks1b	Myadm	Gm9801	Adgrg2
4930534H03Rik	Ndufa3	Fan1	Car5b
2310039L15Rik	Rps9	Tarsl2	Xrcc5
Gm33843	Rpl28	Gm29683	Rgs7
Otogl	Rps5	Chd2	Rab3gap2
Pawr	Chmp2a	1810026B05Rik	Ambra1
Kcnc2	Ube2m	Cpeb1	Ap4e1
Gm15910	Selenow	2610206C17Rik	Ralgapa2
Gm29585	Tmem160	AI314278	Gm42997
Castor1	Ap2s1	Dlg2	Tle1
Egfros	Calm3	Gm45159	E130102H24Rik
Gm12022	Snrpd2	Gm26944	Rundc3b
Slc1a4	Gemin7	Pcf11	Gm43597
Ccdc85a	Apoc1	Tenm4	Hoxa3
Gm29237	Apoe	Gab2	9530026P05Rik
Ubtd2	Rps19	Usp35	Shq1
Efcab9	Rabac1	Il18bp	Gm15492
Kcnip1	Rps16	Stim1	Gm16251
4930469K13Rik	Gmfg	Gm28863	Rabep2
Gm12153	Ech1	1700012D14Rik	B130055M24Rik
Glra1	Eif3k	Tead1	Rnf214
Shisa6	Psmd8	Far1	Hmg20a
Myh3	Cox7a1	4933406I18Rik	Smad3
Alox8	Capns1	Sox6	Gclc
Tm4sf5	Psenen	Iqck	Znrf3
Tekt1	Cox6b1	Acsm5	Gm8098
Mir22hg	Ffar2	Rexo5	Tom1l2
Adap2	Cebpa	Dnah3	Cct6b
Adap2os	Pdcd5	Rbbp6	Gm31508
Rhbdl3	Etfb	Gm45184	F730035M05Rik
Asic2	Emc10	Fbxl19	Gm47802
2610027K06Rik	Atf5	Stx1b	Gm16984
Vmp1	Akt1s1	Plekha1	Ptdss1
4833417C18Rik	Rras	Zranb1	Zfp738
B4galnt2	Rps11	Gm16201	4930525G20Rik
Plxdc1	Rpl13a	Gm32786	Sgtb
Stac2	Ftl1	Kcnq1ot1	Usp54
Grb7	Rasip1	Slc22a18	2810402E24Rik
Brca1	Rpl18	Cfap97d2	Sh2d4b
Cfap97d1	Kcnj14	Slc20a2	4930527F14Rik
Fzd2	Nomo1	Letm2	Atf7
Kcnj16	Ldha	Nsd3	Ubxn7
BC018473	Nav2	Got1l1	Lrch3
C1qtnf1	Ndn	Adrb3	Cramp1l
Card14	Lrrk1	Fut10	Usp49
5033421B08Rik	Arrdc4	Lonrf1	Tcf7l2
Gm49692	Mfge8	Gm16348	Rbmx
F730043M19Rik	Rps17	1700029J07Rik	Mecp2
Hdac9	Nox4	Snx25
Gm35239	Prss23	Cfap97
Akap6	Tmem126a	Hpgd
Pole2	Prcp	Sh3rf1
Gm10457	C230038L03Rik	Gm32507
Gpr135	Ndufc2	Klhl26
Gm48656	Pak1	Zfp961
Gm15283	Acer3	Nr3c2
Tmem229b	Tsku	Arhgap10
Slc8a3	Serpinh1	4933431K23Rik
Rgs6	Rps3	Gm4890
Gm46367	Hbb-bt	Fto
Alkbh1	Hbb-bs	4930488L21Rik
Gm36756	Trim30a	Ctcf
Tc2n	Cavin3	Slc7a6
Itpk1	Smpd1	Zfhx3
Tmem251	Timm10b	Znrf1
Unc79	Mrpl17	Wwox
4930478K11Rik	Eif3f	Cdyl2
4930595D18Rik	Rpl27a	Zfp276
Gm20658	Adm	Pard3
Cdca7l	Eif4g2	Cep126
Gm35330	Rps13	Arhgap42
Chrm3	Rps15a	Gm47557
Ryr2	Arl6ip1	Kdm4d
Gm48682	Itpripl2	Zfp26
Yae1d1	Coq7	Olfm2
Olfr1369-ps1	Ndufab1	Zfp872
Gm11280	Prkcb	Zfp809
Hist1h4c	Tufm	Eepd1
Gm40910	Eif3c	Gm29724
Gcnt2	Bola2	4930581F22Rik
Nedd9	Aldoa	Msantd2
Gm27007	Cdipt	Mir100hg
Gadd45g	Vkorc1	Sik3
Pdlim7	Oat	Zbtb16
Gm47071	Ptpre	Ttc12
Spock1	Fuom	Sik2
Gm47423	Ifitm2	2010007H06Rik
Cmya5	Ifitm3	Zc3h12c
AC163685.1	Hras	Ube2q2
Fam169a	Taldo1	Nrg4
Mast4	Rplp2	Scaper
Gm16741	Pnpla2	Peak1
Gm48370	Polr2l	Man2c1os
Gm48371	Ctsd	Arid3b
Gm31517	Cd81	Myo9a
Gm7480	Ccnd1	Gm33699
Cacna1d	Retn	Pias1
Colq	Fcor	Gm16759
A630023A22Rik	Efnb2	Mtfmt
Grid1	Col4a1	Zfp609
Rubie	Mcf2l	Csnk1g1
Olfr731	Lamp1	Usp3
Olfr732	Csmd1	Vps13c
Olfr733	Zfp703	Rora
Ccnb1ip1	Leprotl1	Ice2
Fgf9	Slc25a4	Sltm
Tnfrsf10b	Cpe	Tcf12
Hr	Lpl	Zfp280d
Gm48968	Ndufa13	Fam214a
Scel	Crlf1	4933433G15Rik
Gpc5	Rex1bd	Phip
C6	Uba52	Bckdhb
Spef2	Ssbp4	Zfp949
Npr3	Jund	Mthfs
1700047G03Rik	Ccdc124	Trpc1
Gm49267	Rpl18a	Gm16794
Gm49313	Nr2f6	Gk5
Slc22a22	Dda1	Clstn2
Gm49497	Bst2	Gm47416
Sla	Pgls	1300017J02Rik
Mei1	Cyp4f18	Ackr4
Cpt1b	Klf2	Rbm6
Olfr279	Smim7	Clasp2
Fam186b	Ndufb7	Rbms3
Nckap5l	Gadd45gip1	Golga4
Scn8a	Calr	Gm2415
Nr4a1	Prdx2	Ctdspl
Rbfox1	Junb	Slc22a14
Abat	Mt2	Acvr2b
Atf7ip2	Mt1	Myrip
2610020C07Rik	Kifc3	Nktr
Gm15738	Cdh5	Gm47121
Gm15764	Tmem208	Tcaim
Ephb3	Tppp3	Zfp445
Etv5	Thap11	Zbtb2
Masp1	Psmb10	Esr1
Gm31814	Hp	4930432B10Rik
Il1rap	Cmc2	Epm2a
Fgf12	Gcsh	Utrn
Kalrn	Hsbp1	Plagl1
E130310I04Rik	Cox4i1	Gm20125
Gramd1c	Map1lc3b	Map3k5
Gm609	Aprt	Bclaf1
Alcam	Trappc2l	Akap7
Robo1	Rpl13	L3mbtl3
E330011O21Rik	Tomm20	Rnf217
Cxadr	Itgb1	Zup1
Gm49226	Endod1	Nt5dc1
Adamts5	Ubl5	Lama4
Mrps6	Mrpl4	Traf3ip2
1700029J03Rik	Cdkn2d	E130307A14Rik
Gm49953	Tmed1	Rev3l
Prss27	Timm29	Ddo
Gm33508	Tmem205	Cep57l1
Gm50013	Prkcsh	Sesn1
Gm34455	Pigyl	Afg1l
Uhrf1bp1	Opcml	Pdss2
Gm22146	Fli1	Gm35552
Gm26885	Ets1	Cep85l
Abcg1	Srpr	Kif1bp
Ubash3a	Pknox2	Herc4
Gm9573	Esam	Arid5b
Ddr1	Hspa8	A930033H14Rik
Ppp1r18os	Oaf	2610008E11Rik
Gm26917	Thy1	Palm
9130008F23Rik	Rps25	Gng7
Ptchd4	Atp5l	Syn3
Rcan2	Rexo2	Gm16271
F630040K05Rik	Gm5617	1700113H08Rik
Catsperd	Timm8b	Cradd
Rab31	Cryab	Acss3
Gm4566	Cib2	Nav3
Ndc80	Cox5a	Trhde
Slc8a1	Islr	Gm15723
Gm49969	Loxl1	Msrb3
Gm6277	Rplp1	Srgap1
Nol4	Rpl4	Lrig3
Fhod3	Ppib	Kif5a
Celf4	Rps27l	Mtmr3
Nme5	2310009A05Rik	Gm11973
E230025N22Rik	Lysmd2	8430419K02Rik
9630014M24Rik	Eef1a1	Meis1
Fgf1	Cox7a2	Spred2
Gm15336	Tmed3	Wdpcp
Plac8l1	Plod2	Ehbp1
Gm41724	Pcolce2	Fam161a
Slc12a2	Copb2	Xpo1
Arhgef37	Slco2a1	Pus10
Piezo2	Trf	Asb3
Nedd4l	Rpl29	Nprl3
Gm50368	Manf	Slit3
Alpk2	Mapkapk3	Gm12122
Mapk4	Tusc2	Ccnjl
Smad7	Hyal2	Pwwp2a
Zbtb7c	Gnai2	Ebf1
Cpt1a	Uba7	Sgcd
Syt12	Gpx1	Cnot6
Fads2	Tma7	Clk4
1500015L24Rik	Cmtm6	Gm12216
AC106834.1	Myd88	2610507I01Rik
Stambpl1	Rpsa	Zfp867
Acta2	Eif1b	4933439C10Rik
Slc16a12	Rpl14	Rai1
Pde6c	Ctnnb1	Pigl
A930028N01Rik	Ss18l2	Trpv2
Cc2d2b	Higd1a	B430319H21Rik
Crtac1	Clec3b	Cntrob
Wnt8b	Sf3b5	Mnt
Cfap43	Rps12	Smg6
1700054A03Rik	Rwdd1	Rffl
Rbm20	Marcks	Taf15
4930484I04Rik	Cd164	Acaca
Gm50100	Gja1	Bcas3
Afap1l2	Smpdl3a	Tex14
Syn1	Ddit4	Gm11508
Lonrf3	Psap	Gm15892
Fam122b	Sar1a	Cuedc1
Fgf13	Srgn	Kcnh4
Aff2	Ado	Gpatch8
Nsdhl	Cisd1	Gjc1
Il1rapl1	Ggt5	Kansl1
Mageb18	Mif	Tlk2
Nhsl2	Chchd10	Tanc2
Nexmif	S100b	Taco1
Hdx	Col6a1	Smurf2
Frmpd3	Slc19a1	Prkca
Mid1	Sumo3	Cep112
Gm47283	Icosl	Slc16a6
Csprs	Rrp1	Arsg
AC149090.1	Cstb	Fam20a
Sdhaf4	Cdc34	Abca5
Ncstn	Bsg	Smim5
Fam107b	Rnf126	Unk
Ssna1	Polr2e	Tnrc6c
Bmyc	Gpx4	Gm11767
Hoxd8	Atp5d	Cenpo
Slc24a5	Gamt	Ncoa1
4930545L23Rik	Rps15	Fam228a
Kat14	Uqcr11	Fam228b
Mcts2	Oaz1	Gm48633
Bpifb6	Timm13	Gm33037
Gcnt7	Slc39a3	Wdr35
Pmepa1	Eef2	Kcns3
Gm14327	Dohh	Smc6
Noct	Tle5	Nol10
Dap3	Ckap4	Grhl1
Mtx1	Timp3	Cys1
Hist2h2aa1	Hsp90b1	Alkal2
Hist2h3c1	Elk3	Agmo
Gclm	Ndufa12	Dock4
Epb41l4b	Mrpl42	Immp2l
Astn2	Dcn	Prkd1
Cdkn2b	Dusp6	Nubpl
Btbd19	Kitl	Pnn
P3h1	Phlda1	Map4k5
Nipal3	Ptprb	Gm4756
Gale	Cct2	Mnat1
Kcnh2	Tmbim4	Slc38a6
Dancr	Nab2	Fut8
Rasl11b	Naca	Fam71d
Srp72	Atp5b	Rad51b
Slc10a6	Cnpy2	2310015A10Rik
Pdgfa	Myl6	Smoc1
Adap1	Rpl41	Acot4
Gm16043	Rps26	4732463B04Rik
Gadd45a	Cd63	Lin52
Rab11fip5	Bloc1s1	Ylpm1
Ret	Smtn	Prox2
Clstn3	Uqcr10	Flvcr2
P3h3	Mrps24	Ttll5
Opa3	Dbnl	Cep128
Cadm4	Ppia	Tshr
Gm44686	Cobl	Ttc8
Gm44649	Sec61g	Gm20682
Me3	Mdh1	Ppp4r4
Lmo1	Rps27a	Atg2b
Gprc5b	Rtn4	Asb13
Fam53b	Hba-a1	Dip2c
Adam12	Hba-a2	Arid4b
Ppp1r3b	Npm1	Sugct
Gmip	Rack1	Gm11290
Comp	Btnl9	C230035I16Rik
Gm26532	Gfpt2	Cdkal1
Acta1	Canx	Exoc2
Angptl8	Hnrnpab	Prpf4b
Sorl1	Nhp2	Cdyl
Gnb5	0610009B22Rik	Fars2
Glyctk	9530068E07Rik	Gm4035
Parp3	Uqcrq	Rreb1
Gm47889	Pdlim4	A730081D07Rik
Tspan15	Hint1	Adtrp
Lrrc3	Gpx3	Sirt5
Sirt6	Gm2a	Atxn1
Cry1	Sparc	Rnf144b
Sycp3	Atox1	6720427I07Rik
Itga7	Guk1	Simc1
Rhbdf1	Arf1	Kif27
Rasd1	Ubb	Dapk1
Arrb2	Pmp22	Ercc6l2
Smtnl2	Ntn1	Zfp369
Rara	Rpl26	Zfp457
Rhbdf2	Arhgef15	Zfp729a
Pqlc3	Eif4a1	Zfp493
Actr10	Tnfsf12	Tppp
Serpina1b	Tmem256	2210408I21Rik
Hist1h4i	Eif5a	Fam172a
Hist1h1e	Gabarap	Nr2f1
Nfil3	Acadvl	A830082K12Rik
Rab24	Bcl6b	9330111N05Rik
Gm48228	Rnasek	Msh3
Emb	Cxcl16	Tent2
Ube2e1	Psmb6	Ap3b1
Lacc1	Slc25a11	Arhgef28
Osmr	Pfn1	Mccc2
Gm5144	Txndc17	Srek1
Matn2	Emc6	Ppwd1
Mal2	Rflnb	Adamts6
Fam83a	Rpl23a	3830408C21Rik
Slc52a2	Tnfaip1	Pde4d
Rps19bp1	Gm17268	Arl15
5031439G07Rik	Ccl7	Gm16263
Gm35853	Slfn5	Fhit
Gm49708	Wfdc21	Ptprg
Jpt2	Car4	Cadps
AI413582	Sept4	Atxn7
Notch3	Dynll2	Rarb
Brd2	Trim25	Thrb
H2-DMa	Gm45716	Ube2e2
Runx2	Nme2	Ppp3cb
Sema6b	Nme1	Kat6b
Lbh	Mrpl27	Lrmda
Ehd3	Col1a1	Dennd6a
Rbbp8	Gngt2	Sfmbt1
Snhg4	Rpl23	Ercc6
Pfdn1	Rpl19	Shld2
Spry4	Mien1	Ddhd1
B430212C06Rik	Eif1	Gm34934
2610016A17Rik	Rab5c	Samd4
Cd274	Cavin1	Pabpn1
Rrp12	Ramp2	Neil2
Ubtd1	Rpl27	Prss51
Maoa	Dusp3	Kif13b
Cfp	Cd300lg	Scara5
Utp14a	G6pc3	Adam2
Lage3	Slc25a39	Cog3
Zc4h2	Grn	Vwa8
Eya1	Pecam1	Klf12
Aff3	Rpl38	Gm34907
Il1r2	Atp5h	B930095G15Rik
Adam23	H3f3b	Dock9
Bok	Mxra7	Clybl
Rnf152	Syngr2	C7
Nuak2	Socs3	Ranbp3l
Kif21b	Lgals3bp	Prlr
Ralgps2	Chmp6	Agxt2
Angptl1	Slc38a10	Zfr
Fmo2	Actg1	Pdzd2
Gm7694	Mrpl12	Trio
Atp1a4	P4hb	Stk3
Ephx1	Arhgdia	Vps13b
Cenpf	Alyref	Lrp12
Lpgat1	Fasn	Zfpm2
Prkcq	Ptrhd1	Gm10373
Apbb1ip	Rhob	Ext1
Cercam	Laptm4a	Sntb1
Hmcn2	Pdia6	Zhx2
Ass1	Odc1	Gm38563
Pla2r1	Hpcal1	Phf20l1
Spc25	Id2	Rbfox2
Slc25a12	Rps7	Gm49694
Gm13703	Twist1	Ddx17
Gm13709	Tspan13	8430426J06Rik
Med19	Meox2	Pacsin2
Ptprj	Etv1	Ppara
Depdc7	Nova1	Tafa5
Casc4	Heatr5a	Ppp6r2
Dusp15	Nfkbia	CN725425
Hck	Rps29	Pdzrn4
Lbp	Rpl36al	Pphln1
Ccn5	Mgat2	Zfp641
Slc2a10	Frmd6	4930578M01Rik
Eya2	Zfp36l1	Prpf40b
Lama5	Galnt16	Gm17057
Tnik	Npc2	5330439K02Rik
Dclk1	Irf2bpl	Gm28876
Schip1	Slirp	Gm49272
Gask1b	Calm1	B630019A10Rik
Vav3	Fbln5	Osbpl11
Plppr4	Ndufb1-ps	Slc12a8
Synpo2	Ifi27l2a	Zbtb20
Prss12	Serpina3c	Boc
Spaar	Glrx5	Zbtb11
Frmd3	Hsp90aa1	Nsun3
Adamtsl1	Ckb	Gbe1
Acot11	Xrcc3	Nrip1
Col16a1	Atp5mpl	Gm45030
Rps6ka1	Siva1	Mir99ahg
Id3	Crip2	Map3k7cl
Kazn	Hist1h4h	2810407A14Rik
Gm13212	Hist1h2bc	Scaf4
Kcnab2	Ripor2	Cryzl1
Adam22	Sox4	Ttc3
Abcb4	Agtr1a	Prdm15
Sema3c	Tubb2a	Gm49797
Magi2	Txndc5	Tiam2
Tec	Tmem14c	Tfb1m
Gm28050	Nol7	Arid1b
P2rx7	Ecm2	Serac1
Serpine1	Ogn	Pacrg
Micall2	Higd2a	Gm16168
Peg10	Cltb	Prkn
Cpa2	Lman2	Airn
Gm44026	Tmed9	Spaca6
Oxtr	Txndc15	Zfp948
Tatdn2	Cxcl14	Zfp995
Dmpk	Tgfbi	Zfand3
Mctp2	Hnrnpa0	Pknox1
Slco3a1	Ctla2a	Gm26549
Dgat2	Ctsl	Akap8l
Mogat2	Uqcrb	Zfp799
Trim30d	Ndufs6	Zfp563
Igsf6	Clptm1l	BC051142
Itgax	Ftl1-ps1	Ppp1r10
Itgad	Cox7c	Supt3
Adam8	Vcan	Kif6
3930402G23Rik	Rps23	Tbc1d5
Dusp4	Btf3	Satb1
Prag1	Serf1	Efna5
Vegfc	Snx18	Fbxl17
Ncan	Hmgcs1	Ptprm
Tbc1d9	Il3ra	Lama1
Cklf	Rpl15	Atl2
Mvd	Gng2	Arhgef33
Mmp12	Chchd1	Map4k3
Naalad2	Rps24	Thada
Col5a3	Selenok	Slc3a1
Ldlr	Mustn1	Camkmt
Dock6	Spcs1	Prkce
St14	Sh3bp5	Svil
Nxpe4	Galnt15	Zfp438
Dapk2	Sncg	Epc1
Col12a1	Mmrn2	Mpp7
Me1	Cnih1	Colec12
Plscr1	Lgals3	Greb1l
Plscr2	Rnase4	1010001N08Rik
Ephb1	Dad1	Ankrd29
Themis	Mrpl52	Lama3
Trdn	Mmp14	Dtna
Tet1	Lrp10	AW554918
Slc41a2	Psme2	Wdr33
Tph2	Ipo4	Sft2d3
Lif	Mdp1	Lims2
Tns3	Nedd8	Pkd2l2
Prorsd1	Sap18	Fam13b
Sh3pxd2b	C1qtnf9	1700086O06Rik
Stk10	Ctsb	Dpysl3
Specc1	Clu	Prr16
Arhgap44	Dpysl2	Zfp608
Atp2a3	Itm2b	Smarcd3
Nxn	Tpt1	Ppargc1b
Nog	Epsti1	Carmn
Tmem100	Lmo7	1500015A07Rik
Krt222	Kctd12	Zfp532
Mrc2	Ednrb	Ccbe1
Sdk2	Gm10076	Ctif
Tmc6	Selenop	Zfp236
Itgb1bp1	Rpl37	Zfp407
Mboat2	Sub1	Coro1b
Nrcam	Rpl30	Kdm2a
Npas3	Cox6c	Rbm4
Prkch	Zfp706	Rbm14
Actn1	Klf10	Malat1
Fos	Ndufb9	Neat1
Tgfb3	Sqle	Gm14966
Ccdc88c	Khdrbs3	Mark2
Pfkp	Ly6e	Plaat5
Sfrp4	Ly6a	Vps13a
Pxdc1	Ly6c1	Pcsk5
Gm30489	Gpihbp1	Smc5
Cks2	Eef1d	Smarca2
Sema4d	Gpt	4430402I18Rik
Iqgap2	Rpl8	9930021J03Rik
Plpp1	Lgals1	Gm36860
Slc4a7	Tomm22	Cpeb3
Slc7a7	Apobec3	Plce1
Slc7a8	Rpl3	Tbc1d12
Diaph3	Snu13	Sorbs1
Myo10	Smdt1	R3hcc1l
Retreg1	Ndufa6	Gm35406
Otulinl	Cyb5r3	Slf2
Ncald	A4galt	Btrc
Kdelr3	Tspo	Fbxw4
Gtse1	Parvb	Armh3
Mylk	Sco2	Mfsd13a
Pdia5	Twf1	Cnnm2
Vgll3	Hdac7	Stn1
App	Tuba1b	Gm31356
Adamts1	Tuba1a	Vti1a
Bace2	Tuba1c	Ppnr
Cd320	Tmbim6	Ablim1
Slc5a7	Gpd1	B230217O12Rik
Tnfaip8l1	Dazap2	Atrnl1
Epb41l3	Atg101	Rab11fip2
Cdkl4	Igfbp6	Zfp950
B4galt6	Mfsd5	Suv39h1
Cystm1	Pfdn5	Rpgr
Camk2a	Prr13	Med14
Pdgfrb	Atp5g2	Gm14634
Sh3tc2	Itga5	Jade3
Rab27b	Glis2	Firre
Capn1	Pam16	Gabre
Rab3il1	Carhsp1	Prrg1
Fads3	Rpl39l	Tab3
Ms4a4b	Cebpd	Klhl15
Prune2	Slc25a1	Gm39526
Fam189a2	Ranbp1	Arhgef9
Dock8	Cldn5	Zc3h12b
Ifit2	Adipoq	Hsf3
Pdlim1	Fam43a	Ar
Pik3ap1	Rpl35a	Ophn1
Golga7b	Ndufb4	Eda
Pyroxd2	Fstl1	Awat2
Csf2ra	Cox17	Hdac8
Mbnl3	Arhgap31	Phka1
Fhl1	Cd200	Abcb7
Dusp9	Rpl24	2810403D21Rik
G6pdx	Jam2	Nox1
Arx	Atp5j	Zmat1
Eda2r	Cyyr1	Gprasp1
Col4a5	Ifnar2	Pak3
Il13ra2	Atp5o	Apex2
Shroom2	Smim11	Pfkfb1
Nhs	Runx1	Fam120c
Reps2	Erg	Bclaf3
B130024G19Rik	Ets2	Phka2
	Fndc1	Cdkl5
	Sod2	Rai2
	Smoc2	Txlng
	Atp6v0c	Ctps2
	Pgp	Kdm5d
	Slc9a3r2	Uty
	Rps2	Tmlhe
	Ndufb10
	Msrb1
	Igfals
	Mrps34
	Tmem204
	Mrpl28
	Dusp1
	Cuta
	Uqcc2
	Rps10
	Rpl10a
	Pi16
	Ndufv3
	Sik1
	Zfp414
	Kank3
	Rps28
	Tapbp
	Rps18
	H2-K1
	Psmb8
	C4b
	Cfb
	1110038B12Rik
	Ddah2
	H2-D1
	Cdsn
	Ier3
	Flot1
	Tubb5
	Mrps18b
	H2-T23
	Znrd1
	AY036118
	Adgrf5
	Clic5
	Runx2os1
	Slc35b2
	Hsp90ab1
	Mrps18a
	Yipf3
	Tbcc
	Ccnd3
	Tomm6
	Lrg1
	Mydgf
	Fem1a
	Micos13
	Rpl36
	Ndufa11
	C3
	Twsg1
	Myl12a
	Rasgrp3
	Cox7a2l
	Mcfd2
	Jcad
	Nrep
	Reep5
	Egr1
	Ndufa2
	Arap3
	Tmed7
	Lox
	Ppic
	Iigp1
	Rps14
	Cd74
	Afap1l1
	Ablim3
	Tubb6
	Rpl17
	BC031181
	Atp5a1
	Pstpip2
	Txnl4a
	Cyb5a
	Cdk2ap2
	Aip
	Ppp1ca
	Cd248
	Rab1b
	Banf1
	Fosl1
	Cfl1
	Cdc42ep2
	Fau
	Znhit2
	Prdx5
	Ppp1r14b
	Fkbp2
	Fermt3
	Cox8a
	Tmem223
	Uqcc3
	Eef1g
	Fth1
	Tmem258
	Tmem109
	AW112010
	Ms4a4d
	Fam111a
	Gcnt1
	Rfk
	Aldh1a7
	Glis3
	Rbp4
	Aldh18a1
	Pgam1
	Avpi1
	Scd2
	Ndufb8
	Mrpl43
	Sfxn3
	Atp5md
	Sfr1
	Srpx
	Gm14636
	Ndufb11
	Timp1
	Pgrmc1
	Slc25a5
	Rpl39
	Ndufa1
	Rtl8a
	Rtl8b
	Mmgt1
	Ids
	Tmem185a
	Vma21
	Bgn
	Maged1
	Efnb1
	Rps4x
	Cox7b
	Pgk1
	Pcdh19
	Rpl36a
	Arxes1
	Tceal8
	Tceal9
	Prps1
	Maged2
	Hsd17b10
	Eif1ax
	Gpm6b
	Tmsb4x
	Arhgap6
	Snhg6
	Kcnq5
	Coa5
	Unc50
	Mrpl30
	Txndc9
	Rpl31
	Asnsd1
	Rftn2
	Dnpep
	Sp110
	Col6a3
	Hes6
	Ndufa10
	Adora1
	Cyb5r1
	Timm17a
	Mpc2
	Hsd17b7
	Pfdn2
	F11r
	Cox20
	H3f3a
	Slc30a1
	A130010J15Rik
	Hsd11b1
	G0s2
	Il2ra
	Commd3
	Tmem203
	Entpd2
	Agpat2
	Dolk
	Swi5
	Cd302
	Gorasp2
	Calcrl
	Selenoh
	Timm10
	Pex16
	Cd59a
	Fibin
	Map1a
	Pcna
	Snx5
	Smim26
	Nanp
	Dynlrb1
	Trp53inp2
	Tgm2
	Pfdn4
	Vapb
	Gnas
	Ppdpf
	Fabp5
	Dnajc19
	Alg5
	Glmp
	Lamtor2
	Ssr2
	Fdps
	Krtcap2
	Pmvk
	Atp8b2
	Jtb
	Mrps21
	Anp32e
	Bola1
	Psma5
	Tmem167b
	Slc39a8
	Smim8
	Myorg
	Creb3
	Plin2
	Sgip1
	Tmem59
	Atp6v0b
	Fhl3
	1110065P20Rik
	Lsm10
	Eva1b
	Smim12
	Atp13a2
	Srm
	Eno1
	Park7
	Tnfrsf25
	Icmt
	A430005L14Rik
	Mxra8
	Cptp
	Fzd1
	Cd36
	Psmc2
	AI506816
	Tomm7
	Nos3
	Insig1
	Kcnk3
	Slc35f6
	Ost4
	Bloc1s4
	Otop1
	Commd8
	Alb
	Mrps18c
	Tmed5
	Srsf9
	Triap1
	Rplp0
	Pebp1
	Sdsl
	Hcar2
	Ran
	Polr2j
	Fis1
	Pop7
	Sap25
	Lamtor4
	Lfng
	Arpc1a
	Bud31
	Gm43150
	Hsph1
	Pon2
	2610001J05Rik
	Mtpn
	Tbxas1
	Ndufb2
	Rarres2
	Pde1c
	Suclg1
	Sec61a1
	Brk1
	Atp6v1e1
	Grcc10
	Emp1
	Abcc9
	Tmem238
	Nop53
	Nova2
	Bcl3
	Tgfb1
	Blvrb
	Timm50
	Fbxo17
	Mrps12
	Rinl
	Yif1b
	Tbcb
	Polr2i
	Tmem147
	Fxyd1
	Scn1b
	Ptov1
	Bax
	Tmem86a
	Hapln3
	Myo7a
	Lamtor1
	Taf10
	Tpp1
	Spon1
	Il4ra
	Nupr1
	2510046G10Rik
	Dctpp1
	Pycard
	Htra1
	Cox8b
	Cd151
	Tspan4
	Mrpl23
	Dhcr7
	Pet100
	Trappc5
	Tnfsf13b
	Grtp1
	Cln8
	Vps36
	Tm2d2
	Eif4ebp1
	Borcs8
	Fkbp8
	Lsm4
	Use1
	Mrpl34
	Samd1
	D8Ertd738e
	Ier2
	Rad23a
	Wdr83os
	Man2b1
	Mmp15
	Rrad
	Ciao2b
	Gabarapl2
	Osgin1
	Crispld2
	Sult5a1
	Chmp1a
	Coa6
	Shfl
	Eif3g
	Fdx2
	Elof1
	Acp5
	Adamts15
	Tbrg1
	Rnf26
	Trappc4
	Nnmt
	Hspb2
	Tspan3
	Cspg4
	Imp3
	Lrrc49
	Gtf2a2
	Gm27241
	Arpp19
	Paqr9
	Rbp1
	Anapc13
	Dusp7
	Cyb561d2
	Ndufaf3
	Mthfd1l
	Fuca2
	Sgk1
	Cenpw
	Gtf3c6
	Prdm1
	Ddt
	Pttg1ip
	Pfkl
	Pwp2
	Pdxk
	Fstl3
	Abca7
	Mbd3
	Abhd17a
	Lsm7
	Gadd45b
	Mrpl54
	Pip5k1c
	Gna11
	Arl1
	Snrpf
	Lin7a
	Csrp2
	Gas2l1
	H2afv
	Tbrg4
	C1d
	Lgalsl
	Ltc4s
	Sept8
	Mrpl55
	Naa38
	Tax1bp3
	Serpinf1
	Timm22
	Traf4
	Rab34
	Supt4a
	Mrps23
	Pctp
	Ankrd40
	Slc35b1
	Phb
	Abi3
	Atp5g1
	Psmb3
	Krt10
	Coa3
	Mrps7
	Trim47
	Ndufaf8
	Slc25a10
	Cenpx
	Dcxr
	Gps1
	Dnajb9
	Arf6
	Vti1b
	Tmed10
	Ahsa1
	Ifi27
	Serpina3n
	Bag5
	Tmem179
	Pacs2
	Ighm
	Idi1
	Psma2
	Hfe
	Irf4
	Psmg4
	Pak1ip1
	Card19
	4833439L19Rik
	Prelid1
	Mrpl36
	Cetn3
	Serinc5
	Dnajc9
	Timm23
	Arhgap22
	Apex1
	Apex1
	Psmb5
	Dhrs1
	Mrpl57
	Phf11d
	Commd6
	Ptger4
	Cmbl
	Polr2k
	Gm45924
	Deptor
	Chrac1
	Ptp4a3
	Lynx1
	Cyc1
	C030006K11Rik
	H1f0
	Polr2f
	Rbx1
	Zcrb1
	Slc48a1
	Cox14
	Cela1
	Zfp385a
	Emp2
	Myh11
	Ap2m1
	Cadm2
	Mrap
	Dynlt1f
	Mrpl18
	Thoc6
	Hcfc1r1
	Tnfrsf12a
	Elob
	Gfer
	Nubp2
	Spsb3
	Atp6v0e
	Cdkn1a
	Mtch1
	Angptl4
	Ndufa7
	Zbtb22
	Pfdn6
	Rnf5
	Agpat1
	H2-Q4
	H2-Q6
	H2-Q7
	Ppp1r11
	Enpp5
	Mrpl14
	Cnpy3
	Ubxn6
	Cebpzos
	Cdh2
	Stard4
	Slc35a4
	Sec11c
	Lman1
	Gm41764
	Ier3ip1
	Cndp2
	Ndufs8
	Aldh3b2
	Gstp1
	Pold4
	B4gat1
	Yif1a
	Ccdc85b
	Rnaseh2c
	Map3k11
	Fam89b
	Znrd2
	Sac3d1
	Ppp2r5b
	Rasgrp2
	Trmt112
	Bad
	Plaat3
	Slc3a2
	Polr2g
	Bscl2
	Vldlr
	Ifit1
	Prdx3
	Syp
	Plp2
	Ebp
	Uba1
	Prr32
	Idh3g
	Ssr4
	Pja1
	Pin4
	Tspan6
	Timm8a1
	Psmd10
	Prdx4
	St18
	Ptpn18
	Neurl3
	Mfsd6
	Nrp2
	Fn1
	Slc11a1
	Des
	Col4a4
	A630001G21Rik
	Inpp5d
	Arl4c
	Ackr3
	Ramp1
	St8sia4
	Tnfrsf11a
	Tmem37
	Rab7b
	Prelp
	Ptprc
	Cfh
	Kcnt2
	Rgs18
	Pla2g4a
	Hmcn1
	1700025G04Rik
	Ncf2
	E330020D12Rik
	Soat1
	Prdx6
	Rcsd1
	Fcgr2b
	Fcgr3
	Fcer1g
	Arhgap30
	Slamf7
	Cd48
	Cd84
	Slamf9
	Aim2
	Akt3
	Itpkb
	C130074G19Rik
	Tgfb2
	Atf3
	Cd34
	Camk1d
	Vim
	Mrc1
	Etl4
	Fcna
	Egfl7
	Olfm1
	Dnm1
	Lcn2
	Ak1
	Ggta1
	Ptgs1
	Arhgap15
	Cytip
	Dpp4
	Rapgef4
	Wipf1
	Itga4
	Spi1
	Creb3l1
	Cd44
	Lmo2
	Fmn1
	Thbs1
	Ehd4
	Stard9
	Slc28a2
	Fbn1
	Atp8b4
	Itpripl1
	Morrbid
	Cpxm1
	Rassf2
	Cox4i2
	Mafb
	Prex1
	Ptgis
	Nfatc2
	Gm14325
	Sox18
	Tpd52
	Sirpb1b
	Gm5150
	Nceh1
	Gpr160
	Postn
	P2ry1
	Gucy1a1
	Sfrp2
	Fcrls
	Thbs3
	Npr1
	S100a4
	S100a8
	Ctss
	Plekho1
	Fcgr1
	Tent5c
	Ptpn22
	Kcnd3
	Cd53
	Slc25a24
	Fnbp1l
	Arsj
	Mcub
	Ostc
	Gbp5
	St6galnac3
	Lyn
	Atp6v0d2
	Enho
	Ccl19
	Tpm2
	Tmod1
	Pole3
	Col27a1
	Orm2
	Hacd4
	Ror1
	Pde4b
	Dhcr24
	Kti12
	Ctps
	Map7d1
	Sdc3
	Laptm5
	Ptafr
	Fgr
	Hmgn2
	Cd52
	Stmn1
	Pnrc2
	C1qb
	C1qc
	C1qa
	Hspg2
	Nbl1
	Arhgef10l
	Hspb7
	Fblim1
	Tmem51
	Pdpn
	Casz1
	Pgd
	Ctnnbip1
	Pik3cd
	Pusl1
	Cdk6
	Gsap
	Fgl2
	Lrpap1
	C1qtnf7
	Ldb2
	Slit2
	Rell1
	Ociad2
	Adgrl3
	Sult1e1
	Pf4
	Sept11
	Anxa3
	Abcg3
	Lrrc8c
	Crlf2
	2900026A02Rik
	Tmem119
	Selplg
	Pop5
	Wsb2
	Gm43069
	Kmt5a
	Adgrd1
	Zbed5
	Galnt17
	Ncf1
	Eln
	Ccl24
	Rasa4
	Card11
	Alox5ap
	Thsd7a
	Capza2
	Lep
	Calu
	Irf5
	Plxna4
	Gpnmb
	Tril
	Chn2
	Hpgds
	Tnip3
	Capg
	Pcyox1
	Antxr1
	Arhgap25
	Fbln2
	Fgd5
	Frmd4b
	Lmcd1
	Plxnd1
	Rassf4
	Mfap5
	Apobec1
	C3ar1
	Clec4a1
	Clec4a3
	Clec4b1
	Clec4a2
	Cd163
	Ptpn6
	Cd9
	Ccnd2
	Gm15987
	Clec12a
	Mgp
	Arhgdib
	Ptpro
	Pde3a
	Gys2
	Kcnj8
	Lrmp
	Tmtc1
	Pirb
	Lair1
	C5ar1
	Plaur
	Pou2f2
	Axl
	Numbl
	Ltbp4
	Plekhg2
	Rasgrp4
	Tyrobp
	Fxyd5
	Rcn3
	Cd37
	Emp3
	Saa3
	Aldh1a3
	Cib1
	Fes
	Iqgap1
	Tm6sf1
	Il16
	Ctsc
	Ucp2
	Arhgef17
	P2ry6
	Pde2a
	Folr2
	Rrm1
	Lyve1
	Cdr2
	Coro1a
	Itgal
	Itgam
	Rgs10
	Mki67
	Lsp1
	Ano1
	Cd209f
	Cd209g
	Plat
	Sfrp1
	Mfhas1
	Msr1
	Tenm3
	Wdr17
	March1
	Psd3
	Csgalnact1
	Lrrc25
	Ifi30
	Tpm4
	Hmox1
	Adcy7
	Mmp2
	Adgrg1
	Cmtm3
	Smpd3
	Cyb5b
	Plcg2
	Cdh13
	Cotl1
	Irf8
	Cyba
	Cbfa2t3
	Dpep1
	Agt
	2310022B05Rik
	Gucy1a2
	Fat3
	Pin1
	Slc37a2
	Ubash3b
	Il10ra
	Fxyd2
	Tagln
	Arhgap20
	Itga11
	Plekho2
	Anxa2
	Myo1e
	Filip1
	Ctsh
	Slc9a9
	Cmtm7
	Itga9
	Gorasp1
	Lars2
	Ccr2
	Ccr5
	Plekhg1
	Adgrg6
	Abracl
	Nhsl1
	Gm26740
	Lama2
	Fyn
	Sobp
	Gm35154
	Lilr4b
	Lilrb4a
	Pcbd1
	Col6a2
	Col18a1
	Itgb2
	Dnmt3l
	Cnn2
	Arhgap45
	Adamtsl5
	Gas2l3
	Ntn4
	Plxnc1
	Lum
	Lyz2
	Rassf3
	Arhgap9
	Ndufa4l2
	Selenom
	Aebp1
	Myo1g
	Igfbp3
	Ikzf1
	Plek
	Bcl11a
	Eml6
	Lcp2
	Dock2
	Insyn2b
	Ccng1
	Adam19
	Gas7
	Pik3r5
	Pik3r6
	Trappc1
	Chd3
	Cd68
	Mgl2
	Clec10a
	Nlrp1b
	Abr
	Unc119
	Tmem97
	Evi2a
	Ccl2
	Ccl11
	Ccl8
	Slfn2
	Ccl5
	Ccl9
	Ccl6
	Wfdc17
	Mir142hg
	Mmd
	Ikzf3
	Acly
	Naglu
	Vat1
	Tmem101
	Fmnl1
	Cyb561
	Ace
	Ftsj3
	Pitpnc1
	Abca9
	Abca6
	Kcnj2
	Cd300a
	Cd300lb
	Cd300ld
	Cd300c2
	Nt5c
	Cygb
	Sept9
	Timp2
	Cbr2
	Metrnl
	Cdhr3
	Dact1
	Rtn1
	Rhoj
	Ston2
	Flrt2
	Gm19951
	Kcnk13
	Rin3
	Lgmn
	Eml1
	Evl
	Meg3
	Rian
	Tnfaip2
	Pld4
	Ahnak2
	Crip1
	Ighd
	Rapgef5
	Klf6
	Gli3
	Elmo1
	Aoah
	Cmah
	2610307P16Rik
	Serpinb9
	F13a1
	Ly86
	Bmp6
	Cd83
	Ninj1
	Aspn
	Syk
	Ror2
	Tspan17
	Dbn1
	Gas1
	4930486L24Rik
	Mctp1
	Mef2c
	Hexb
	Zfp366
	Naip2
	Cd180
	Il31ra
	Fst
	Parp8
	Gm21188
	Flnb
	Gm48099
	Stab1
	Wdfy4
	Ear2
	Il17d
	Spata13
	Loxl2
	Pdlim2
	Slc39a14
	Bmp1
	Dok2
	Gfra2
	Lcp1
	Dach1
	Cln5
	Gpc6
	Gpr183
	Itgbl1
	Dab2
	Fyb
	Il7r
	Basp1
	Dap
	Samd12
	Col14a1
	Pvt1
	Plec
	Vps28
	Pvalb
	Csf2rb
	C1qtnf6
	Rac2
	Cyth4
	Pdgfb
	Nfam1
	Cerk
	Plxnb2
	Shank3
	Slc38a1
	Krt79
	Nckap1l
	Ciita
	P3h2
	Hes1
	0610012G03Rik
	Nrros
	Gm15564
	Cd86
	Hcls1
	Pla1a
	Cd200r1
	Phldb2
	Nectin3
	Retnla
	Cmss1
	Filip1l
	Samsn1
	Dynlt1a
	Ezr
	Pde10a
	Agpat4
	Thbs2
	Tsc2
	Fgd2
	Myo1f
	H2-DMb1
	H2-Ab1
	H2-Aa
	H2-Eb1
	Tnxb
	Clic1
	Aif1
	Lst1
	Ubd
	Gm42418
	Tnfrsf21
	Pla2g7
	Trerf1
	Trem2
	Rftn1
	Adgre4
	Vav1
	Adgre1
	Gm26510
	Emilin2
	Ltbp1
	Vit
	Cyp1b1
	Zfp36l2
	Plekhh2
[truncated: 47 more rows]

## Sheet: Cluster 1
GroupID	Category	Term	Description	LogP	Log(q-value)	Symbols
1_Summary	GO Biological Processes	GO:0042391	regulation of membrane potential	-9.65941	-5.49573	Asic2,Ank3,App,Bdnf,Cacna1a,Cacna1d,Cacnb4,Cdk5,Cux2,Cxadr,Dmpk,Fgf12,Fgf13,Fhl1,Gabrb3,Gclm,Glra1,Kcnab2,Kcnh2,Smad7,P2rx7,Ryr2,Scn8a,Slc8a1,Trpc4,Atp1a4,Bok,Ehd3,Pex5l,Trpm4,Kcnip1,Nos1ap,Trdn,Nedd4l,Celf4,Slc8a3,Pawr,Ctnna3,Akap6,Grip2,Kcnc2,Abat,Nrcam,Dgki,Piezo2,Cacna1e,Casq1,Cckbr,Chrm3,Cry1,G6pdx,Gnao1,Grm1,Nr4a1,Itgax,Lif,Oxtr,Ptger3,Tmem38b,C1qtnf1,Tmem100,Mlip,Cmya5,Slc25a12,Prkag3,Dlga…
1_Member	GO Biological Processes	GO:0042391	regulation of membrane potential	-9.65941	-5.49573	Asic2,Ank3,App,Bdnf,Cacna1a,Cacna1d,Cacnb4,Cdk5,Cux2,Cxadr,Dmpk,Fgf12,Fgf13,Fhl1,Gabrb3,Gclm,Glra1,Kcnab2,Kcnh2,Smad7,P2rx7,Ryr2,Scn8a,Slc8a1,Trpc4,Atp1a4,Bok,Ehd3,Pex5l,Trpm4,Kcnip1,Nos1ap,Trdn,Nedd4l,Celf4,Slc8a3,Pawr,Ctnna3,Akap6,Grip2,Kcnc2,Abat,Nrcam,Dgki,Piezo2
1_Member	GO Biological Processes	GO:0044057	regulation of system process	-6.4974	-3.37612	Asic2,App,Cacna1d,Cacna1e,Casq1,Cckbr,Chrm3,Cry1,Cux2,Cxadr,Dmpk,Fgf12,Fgf13,G6pdx,Glra1,Gnao1,Grm1,Nr4a1,Itgax,Kcnh2,Lif,Smad7,Oxtr,Ptger3,Ryr2,Slc8a1,Tmem38b,C1qtnf1,Ehd3,Pex5l,Tmem100,Trpm4,Mlip,Nos1ap,Cmya5,Slc25a12,Celf4,Slc8a3,Pawr,Ctnna3,Akap6,Prkag3,Grip2,Dlgap2,Abat,Spx,Shisa6
1_Member	GO Biological Processes	GO:0031644	regulation of nervous system process	-4.04004	-1.73642	App,Cckbr,Cux2,Dmpk,Fgf12,Glra1,Grm1,Itgax,Tmem100,Slc25a12,Celf4,Slc8a3,Pawr,Grip2,Dlgap2,Abat,Spx,Shisa6
2_Summary	GO Biological Processes	GO:0010959	regulation of metal ion transport	-9.4621	-5.49573	Ank3,Cacna1a,Cacna1d,Cacnb4,Camk2a,Casq1,Cd4,Cdk5,Dmpk,Fgf12,Fgf13,Fhl1,G6pdx,Gnao1,Gnb5,Kcnab1,Kcnab2,Kcnh2,P2rx7,Pdgfrb,Serpine1,Ptger3,Ryr2,Slc8a1,Trpc4,Dysf,Tmem38b,Ehd3,Lpar3,Kcnip1,Vmp1,Trdn,Nedd4l,Mylk,Pawr,Arrb2,Stac2,Akap6,Tspan18,Kcnc2,Fcrl5,Cracr2a,Nkain2,Asic2,App,Cacna1e,Ephb2,Kcnj16,Scn8a,Tpcn2,Chrm3,Gsg1l,Shisa6,Sirt6
2_Member	GO Biological Processes	GO:0010959	regulation of metal ion transport	-9.4621	-5.49573	Ank3,Cacna1a,Cacna1d,Cacnb4,Camk2a,Casq1,Cd4,Cdk5,Dmpk,Fgf12,Fgf13,Fhl1,G6pdx,Gnao1,Gnb5,Kcnab1,Kcnab2,Kcnh2,P2rx7,Pdgfrb,Serpine1,Ptger3,Ryr2,Slc8a1,Trpc4,Dysf,Tmem38b,Ehd3,Lpar3,Kcnip1,Vmp1,Trdn,Nedd4l,Mylk,Pawr,Arrb2,Stac2,Akap6,Tspan18,Kcnc2,Fcrl5,Cracr2a,Nkain2
2_Member	GO Biological Processes	GO:0043269	regulation of monoatomic ion transport	-8.3495	-4.68416	Asic2,Ank3,App,Cacna1a,Cacna1d,Cacna1e,Cacnb4,Camk2a,Casq1,Cd4,Cdk5,Dmpk,Ephb2,Fgf12,Fgf13,Fhl1,G6pdx,Gnao1,Gnb5,Kcnab1,Kcnab2,Kcnh2,Kcnj16,P2rx7,Pdgfrb,Serpine1,Ptger3,Ryr2,Scn8a,Slc8a1,Trpc4,Dysf,Tmem38b,Ehd3,Lpar3,Kcnip1,Vmp1,Trdn,Nedd4l,Mylk,Pawr,Arrb2,Stac2,Tpcn2,Akap6,Tspan18,Kcnc2,Fcrl5,Cracr2a,Nkain2
2_Member	GO Biological Processes	GO:0051924	regulation of calcium ion transport	-8.17228	-4.68302	Cacna1a,Cacna1d,Cacnb4,Camk2a,Casq1,Cd4,Cdk5,G6pdx,Gnao1,Gnb5,P2rx7,Pdgfrb,Serpine1,Ptger3,Ryr2,Slc8a1,Trpc4,Dysf,Tmem38b,Ehd3,Lpar3,Vmp1,Trdn,Mylk,Pawr,Arrb2,Stac2,Akap6,Tspan18,Fcrl5,Cracr2a
2_Member	GO Biological Processes	GO:0051928	positive regulation of calcium ion transport	-7.7953	-4.38735	Cacna1d,Cacnb4,Camk2a,Casq1,Cd4,Cdk5,G6pdx,P2rx7,Pdgfrb,Serpine1,Ryr2,Trpc4,Ehd3,Lpar3,Vmp1,Trdn,Mylk,Arrb2,Stac2,Akap6,Cracr2a
2_Member	GO Biological Processes	GO:0043270	positive regulation of monoatomic ion transport	-7.75167	-4.38735	Asic2,Ank3,Cacna1d,Cacnb4,Camk2a,Casq1,Cd4,Cdk5,Ephb2,Fgf12,Fhl1,G6pdx,Kcnh2,P2rx7,Pdgfrb,Serpine1,Ryr2,Trpc4,Ehd3,Lpar3,Vmp1,Trdn,Nedd4l,Mylk,Arrb2,Stac2,Akap6,Kcnc2,Cracr2a
2_Member	GO Biological Processes	GO:1904062	regulation of monoatomic cation transmembrane transport	-6.9019	-3.63611	Asic2,Ank3,App,Cacna1a,Cacna1d,Cacnb4,Casq1,Cd4,Cdk5,Fgf12,Fgf13,Fhl1,G6pdx,Gnb5,Kcnab1,Kcnab2,Kcnh2,P2rx7,Ptger3,Ryr2,Slc8a1,Dysf,Tmem38b,Ehd3,Kcnip1,Vmp1,Trdn,Nedd4l,Stac2,Akap6,Kcnc2,Fcrl5,Cracr2a
2_Member	GO Biological Processes	GO:2001257	regulation of cation channel activity	-6.41762	-3.3263	Asic2,Ank3,App,Cacna1a,Cacnb4,Casq1,Cdk5,Fgf12,Fgf13,Gnb5,Kcnab1,Dysf,Ehd3,Trdn,Nedd4l,Stac2,Akap6,Kcnc2,Cracr2a
2_Member	GO Biological Processes	GO:0034765	regulation of monoatomic ion transmembrane transport	-6.2803	-3.24334	Asic2,Ank3,App,Cacna1a,Cacna1d,Cacna1e,Cacnb4,Casq1,Cd4,Cdk5,Ephb2,Fgf12,Fgf13,Fhl1,G6pdx,Gnb5,Kcnab1,Kcnab2,Kcnh2,Kcnj16,P2rx7,Ptger3,Ryr2,Scn8a,Slc8a1,Dysf,Tmem38b,Ehd3,Kcnip1,Vmp1,Trdn,Nedd4l,Stac2,Tpcn2,Akap6,Kcnc2,Fcrl5,Cracr2a
2_Member	GO Biological Processes	GO:0032412	regulation of monoatomic ion transmembrane transporter activity	-6.16534	-3.19896	Asic2,Ank3,App,Cacna1a,Cacna1d,Cacnb4,Casq1,Cdk5,Chrm3,Ephb2,Fgf12,Fgf13,Fhl1,Gnb5,Kcnab1,Ryr2,Dysf,Ehd3,Vmp1,Trdn,Nedd4l,Stac2,Akap6,Kcnc2,Gsg1l,Shisa6,Cracr2a
2_Member	GO Biological Processes	GO:0022898	regulation of transmembrane transporter activity	-5.79569	-2.97544	Asic2,Ank3,App,Cacna1a,Cacna1d,Cacnb4,Casq1,Cdk5,Chrm3,Ephb2,Fgf12,Fgf13,Fhl1,Gnb5,Kcnab1,Ryr2,Dysf,Ehd3,Vmp1,Trdn,Nedd4l,Stac2,Akap6,Kcnc2,Gsg1l,Shisa6,Cracr2a
2_Member	GO Biological Processes	GO:1903169	regulation of calcium ion transmembrane transport	-5.68579	-2.90974	Cacna1a,Cacna1d,Cacnb4,Casq1,Cd4,Cdk5,G6pdx,Gnb5,P2rx7,Ptger3,Ryr2,Slc8a1,Dysf,Tmem38b,Ehd3,Vmp1,Trdn,Stac2,Akap6,Fcrl5,Cracr2a
2_Member	GO Biological Processes	GO:1904064	positive regulation of cation transmembrane transport	-5.51826	-2.81483	Asic2,Ank3,Cacna1d,Cacnb4,Casq1,Cd4,Cdk5,G6pdx,Kcnh2,P2rx7,Ryr2,Ehd3,Vmp1,Trdn,Nedd4l,Stac2,Akap6,Kcnc2,Cracr2a
2_Member	GO Biological Processes	GO:1901021	positive regulation of calcium ion transmembrane transporter activity	-5.49117	-2.81483	Cacnb4,Casq1,Cdk5,Ryr2,Ehd3,Vmp1,Trdn,Stac2,Akap6,Cracr2a
2_Member	GO Biological Processes	GO:0032409	regulation of transporter activity	-5.42392	-2.793	Asic2,Ank3,App,Cacna1a,Cacna1d,Cacnb4,Casq1,Cdk5,Chrm3,Ephb2,Fgf12,Fgf13,Fhl1,Gnb5,Kcnab1,Ryr2,Dysf,Ehd3,Vmp1,Trdn,Nedd4l,Stac2,Akap6,Kcnc2,Gsg1l,Shisa6,Cracr2a
2_Member	GO Biological Processes	GO:2001259	positive regulation of cation channel activity	-5.39115	-2.7865	Asic2,Ank3,Cacnb4,Casq1,Cdk5,Ehd3,Trdn,Nedd4l,Stac2,Akap6,Kcnc2,Cracr2a
2_Member	GO Biological Processes	GO:0034762	regulation of transmembrane transport	-5.14292	-2.57449	Asic2,Ank3,App,Cacna1a,Cacna1d,Cacna1e,Cacnb4,Casq1,Cd4,Cdk5,Chrm3,Ephb2,Fgf12,Fgf13,Fhl1,G6pdx,Gnb5,Kcnab1,Kcnab2,Kcnh2,Kcnj16,P2rx7,Ptger3,Ryr2,Scn8a,Slc8a1,Dysf,Sirt6,Tmem38b,Ehd3,Kcnip1,Vmp1,Trdn,Nedd4l,Stac2,Tpcn2,Akap6,Kcnc2,Gsg1l,Fcrl5,Shisa6,Cracr2a
2_Member	GO Biological Processes	GO:1904427	positive regulation of calcium ion transmembrane transport	-5.02835	-2.49334	Cacna1d,Cacnb4,Casq1,Cd4,Cdk5,G6pdx,P2rx7,Ryr2,Ehd3,Vmp1,Trdn,Stac2,Akap6,Cracr2a
2_Member	GO Biological Processes	GO:0034767	positive regulation of monoatomic ion transmembrane transport	-4.99541	-2.46836	Asic2,Ank3,Cacna1d,Cacnb4,Casq1,Cd4,Cdk5,Ephb2,G6pdx,Kcnh2,P2rx7,Ryr2,Ehd3,Vmp1,Trdn,Nedd4l,Stac2,Akap6,Kcnc2,Cracr2a
2_Member	GO Biological Processes	GO:1901019	regulation of calcium ion transmembrane transporter activity	-4.91466	-2.41399	Cacna1a,Cacnb4,Casq1,Cdk5,Gnb5,Ryr2,Dysf,Ehd3,Vmp1,Trdn,Stac2,Akap6,Cracr2a
2_Member	GO Biological Processes	GO:0032414	positive regulation of ion transmembrane transporter activity	-4.69114	-2.24981	Asic2,Ank3,Cacnb4,Casq1,Cdk5,Ephb2,Ryr2,Ehd3,Vmp1,Trdn,Nedd4l,Stac2,Akap6,Kcnc2,Cracr2a
2_Member	GO Biological Processes	GO:0032411	positive regulation of transporter activity	-4.31621	-1.95607	Asic2,Ank3,Cacnb4,Casq1,Cdk5,Ephb2,Ryr2,Ehd3,Vmp1,Trdn,Nedd4l,Stac2,Akap6,Kcnc2,Cracr2a
2_Member	GO Biological Processes	GO:0034764	positive regulation of transmembrane transport	-3.2049	-1.10217	Asic2,Ank3,Cacna1d,Cacnb4,Casq1,Cd4,Cdk5,Ephb2,G6pdx,Kcnh2,P2rx7,Ryr2,Ehd3,Vmp1,Trdn,Nedd4l,Stac2,Akap6,Kcnc2,Cracr2a
3_Summary	GO Biological Processes	GO:0034330	cell junction organization	-9.27986	-5.48958	Asic2,Ank3,App,Bdnf,Cacna1a,Cacnb4,Cdk5,Col4a5,Cxadr,Epb41l3,Ephb2,Ephb3,Fgf13,Fzd5,Gabrb3,Il1rap,Lama5,Smad7,Pkp1,Ptprk,Syn1,Tgfb3,Ugt8a,Magi2,Sez6l,Svep1,Zdhhc2,Nos1ap,Palld,Vmp1,Etv5,Actn1,Shroom2,Slc8a3,Lrrc4,Arhgap44,Igsf21,Micall2,Clstn3,Plekha7,Gpm6a,Sdk2,Pkhd1,Ephb1,Il1rapl1,Colq,Kalrn,Hmcn2
3_Member	GO Biological Processes	GO:0034330	cell junction organization	-9.27986	-5.48958	Asic2,Ank3,App,Bdnf,Cacna1a,Cacnb4,Cdk5,Col4a5,Cxadr,Epb41l3,Ephb2,Ephb3,Fgf13,Fzd5,Gabrb3,Il1rap,Lama5,Smad7,Pkp1,Ptprk,Syn1,Tgfb3,Ugt8a,Magi2,Sez6l,Svep1,Zdhhc2,Nos1ap,Palld,Vmp1,Etv5,Actn1,Shroom2,Slc8a3,Lrrc4,Arhgap44,Igsf21,Micall2,Clstn3,Plekha7,Gpm6a,Sdk2,Pkhd1,Ephb1,Il1rapl1,Colq,Kalrn,Hmcn2
3_Member	GO Biological Processes	GO:0050808	synapse organization	-8.22382	-4.68302	Asic2,Ank3,App,Bdnf,Cacna1a,Cacnb4,Cdk5,Col4a5,Ephb2,Ephb3,Fgf13,Fzd5,Gabrb3,Il1rap,Lama5,Syn1,Magi2,Sez6l,Zdhhc2,Nos1ap,Palld,Etv5,Slc8a3,Lrrc4,Arhgap44,Igsf21,Clstn3,Gpm6a,Sdk2,Ephb1,Il1rapl1,Colq,Kalrn,Hmcn2
3_Member	GO Biological Processes	GO:0007416	synapse assembly	-6.86212	-3.63611	Asic2,App,Bdnf,Cacna1a,Cdk5,Ephb2,Fgf13,Fzd5,Gabrb3,Magi2,Zdhhc2,Lrrc4,Clstn3,Gpm6a,Sdk2,Il1rapl1
3_Member	GO Biological Processes	GO:0034329	cell junction assembly	-4.90951	-2.41399	Asic2,App,Bdnf,Cacna1a,Cdk5,Epb41l3,Ephb2,Fgf13,Fzd5,Gabrb3,Smad7,Pkp1,Ptprk,Ugt8a,Magi2,Zdhhc2,Vmp1,Actn1,Lrrc4,Micall2,Clstn3,Gpm6a,Sdk2,Il1rapl1
4_Summary	GO Biological Processes	GO:0030001	metal ion transport	-6.93308	-3.63611	Asic2,Cacna1a,Cacna1d,Cacna1e,Cacnb4,Camk2a,Cdk5,Fgf13,Slc6a13,Kcnab1,Kcnab2,Kcnh2,Kcnj16,P2rx7,Ryr2,Scn8a,Scnn1a,Slc12a2,Slc20a1,Slc8a1,Slc6a6,Trpc4,Atp1a4,Tfr2,Tmem38b,Atp2a3,Slc5a7,Mcoln2,Trpm4,Kcnip1,Slc41a3,Nipal3,Slc10a6,Trdn,Nedd4l,Slc8a3,Pawr,Slc4a7,Tpcn2,Hephl1,Kcnc2,Plch2,Slc24a5,Fcrl5,Slc41a2,Cracr2a,Grm1,Slc7a8,Slc1a4,Slc18a1,Slc2a10,Plppr4,Spx,Atp6v0a4,Piezo2,Gabrb3,Glra1,Ank3,App,Cc…
4_Member	GO Biological Processes	GO:0030001	metal ion transport	-6.93308	-3.63611	Asic2,Cacna1a,Cacna1d,Cacna1e,Cacnb4,Camk2a,Cdk5,Fgf13,Slc6a13,Kcnab1,Kcnab2,Kcnh2,Kcnj16,P2rx7,Ryr2,Scn8a,Scnn1a,Slc12a2,Slc20a1,Slc8a1,Slc6a6,Trpc4,Atp1a4,Tfr2,Tmem38b,Atp2a3,Slc5a7,Mcoln2,Trpm4,Kcnip1,Slc41a3,Nipal3,Slc10a6,Trdn,Nedd4l,Slc8a3,Pawr,Slc4a7,Tpcn2,Hephl1,Kcnc2,Plch2,Slc24a5,Fcrl5,Slc41a2,Cracr2a
4_Member	GO Biological Processes	GO:0098657	import into cell	-6.65509	-3.50163	Cacna1a,Cacna1d,Cacna1e,Slc6a13,Grm1,Kcnh2,Kcnj16,Scnn1a,Slc12a2,Slc8a1,Slc6a6,Atp1a4,Tfr2,Slc7a8,Slc1a4,Trpm4,Slc18a1,Slc8a3,Pawr,Slc2a10,Plppr4,Spx
4_Member	GO Biological Processes	GO:0006812	monoatomic cation transport	-6.01646	-3.12926	Asic2,Cacna1a,Cacna1d,Cacna1e,Cacnb4,Camk2a,Cdk5,Fgf13,Slc6a13,Kcnab1,Kcnab2,Kcnh2,Kcnj16,P2rx7,Ryr2,Scn8a,Scnn1a,Slc12a2,Slc20a1,Slc8a1,Slc6a6,Trpc4,Atp1a4,Tfr2,Tmem38b,Atp2a3,Slc5a7,Mcoln2,Trpm4,Kcnip1,Slc41a3,Nipal3,Slc10a6,Trdn,Nedd4l,Slc8a3,Pawr,Atp6v0a4,Slc4a7,Tpcn2,Hephl1,Kcnc2,Plch2,Slc24a5,Fcrl5,Slc41a2,Cracr2a,Piezo2
4_Member	GO Biological Processes	GO:0098739	import across plasma membrane	-5.76652	-2.96151	Cacna1a,Cacna1d,Cacna1e,Slc6a13,Grm1,Kcnh2,Kcnj16,Scnn1a,Slc12a2,Slc8a1,Slc6a6,Atp1a4,Slc7a8,Slc1a4,Trpm4,Slc8a3,Pawr,Slc2a10
4_Member	GO Biological Processes	GO:0070588	calcium ion transmembrane transport	-5.3359	-2.74059	Cacna1a,Cacna1d,Cacna1e,Cacnb4,P2rx7,Ryr2,Slc8a1,Trpc4,Tmem38b,Atp2a3,Mcoln2,Trpm4,Trdn,Slc8a3,Pawr,Tpcn2,Plch2,Slc24a5,Fcrl5
4_Member	GO Biological Processes	GO:0070509	calcium ion import	-5.03096	-2.49334	Cacna1a,Cacna1d,Cacna1e,Cdk5,Slc8a1,Trpc4,Slc24a5
4_Member	GO Biological Processes	GO:0097553	calcium ion transmembrane import into cytosol	-4.96452	-2.44531	Cacna1a,Cacna1d,Cacna1e,P2rx7,Ryr2,Slc8a1,Tmem38b,Trdn,Slc8a3,Pawr,Tpcn2,Plch2,Fcrl5
4_Member	GO Biological Processes	GO:0006816	calcium ion transport	-4.889	-2.41399	Cacna1a,Cacna1d,Cacna1e,Cacnb4,Camk2a,Cdk5,P2rx7,Ryr2,Slc8a1,Trpc4,Tmem38b,Atp2a3,Mcoln2,Trpm4,Trdn,Slc8a3,Pawr,Tpcn2,Plch2,Slc24a5,Fcrl5,Cracr2a
4_Member	GO Biological Processes	GO:0098659	inorganic cation import across plasma membrane	-4.32183	-1.95607	Cacna1a,Cacna1d,Cacna1e,Kcnh2,Kcnj16,Scnn1a,Slc12a2,Slc8a1,Atp1a4,Trpm4,Slc8a3,Pawr
4_Member	GO Biological Processes	GO:0099587	inorganic ion import across plasma membrane	-4.32183	-1.95607	Cacna1a,Cacna1d,Cacna1e,Kcnh2,Kcnj16,Scnn1a,Slc12a2,Slc8a1,Atp1a4,Trpm4,Slc8a3,Pawr
4_Member	GO Biological Processes	GO:0098703	calcium ion import across plasma membrane	-4.19131	-1.84818	Cacna1a,Cacna1d,Cacna1e,Slc8a1,Slc8a3,Pawr
4_Member	GO Biological Processes	GO:0098660	inorganic ion transmembrane transport	-4.12403	-1.79113	Asic2,Cacna1a,Cacna1d,Cacna1e,Cacnb4,Gabrb3,Slc6a13,Glra1,Kcnh2,Kcnj16,P2rx7,Ryr2,Scn8a,Scnn1a,Slc12a2,Slc20a1,Slc8a1,Slc6a6,Trpc4,Atp1a4,Tmem38b,Atp2a3,Mcoln2,Trpm4,Kcnip1,Slc41a3,Trdn,Slc8a3,Pawr,Atp6v0a4,Tpcn2,Kcnc2,Plch2,Slc24a5,Fcrl5,Slc41a2
4_Member	GO Biological Processes	GO:0098662	inorganic cation transmembrane transport	-3.94882	-1.66818	Asic2,Cacna1a,Cacna1d,Cacna1e,Cacnb4,Slc6a13,Kcnh2,Kcnj16,P2rx7,Ryr2,Scn8a,Scnn1a,Slc12a2,Slc8a1,Slc6a6,Trpc4,Atp1a4,Tmem38b,Atp2a3,Mcoln2,Trpm4,Kcnip1,Slc41a3,Trdn,Slc8a3,Pawr,Atp6v0a4,Tpcn2,Kcnc2,Plch2,Slc24a5,Fcrl5,Slc41a2
4_Member	GO Biological Processes	GO:0098655	monoatomic cation transmembrane transport	-3.87015	-1.60549	Asic2,Cacna1a,Cacna1d,Cacna1e,Cacnb4,Slc6a13,Kcnh2,Kcnj16,P2rx7,Ryr2,Scn8a,Scnn1a,Slc12a2,Slc8a1,Slc6a6,Trpc4,Atp1a4,Tmem38b,Atp2a3,Mcoln2,Trpm4,Kcnip1,Slc41a3,Trdn,Slc8a3,Pawr,Atp6v0a4,Tpcn2,Kcnc2,Plch2,Slc24a5,Fcrl5,Slc41a2
4_Member	GO Biological Processes	GO:0034220	monoatomic ion transmembrane transport	-3.41149	-1.2501	Asic2,Cacna1a,Cacna1d,Cacna1e,Cacnb4,Gabrb3,Slc6a13,Glra1,Kcnh2,Kcnj16,P2rx7,Ryr2,Scn8a,Scnn1a,Slc12a2,Slc8a1,Slc6a6,Trpc4,Atp1a4,Tmem38b,Atp2a3,Mcoln2,Trpm4,Kcnip1,Slc41a3,Trdn,Slc8a3,Pawr,Atp6v0a4,Tpcn2,Kcnc2,Plch2,Slc24a5,Fcrl5,Slc41a2
4_Member	GO Biological Processes	GO:0055080	monoatomic cation homeostasis	-2.81057	-0.846364	Ank3,App,Cacna1a,Cacnb4,Cckbr,Cdk5,Dmpk,Kcnh2,Kcnj16,Ryr2,Scnn1a,Slc12a2,Slc8a1,Trpc4,Atp1a4,Tfr2,Bok,Atp2a3,Car12,Trdn,Bmyc,Slc8a3,Atp6v0a4,Lacc1,Slc4a7,Tpcn2,Inpp4b,Pkhd1,Hephl1,Slc24a5
4_Member	GO Biological Processes	GO:0006874	intracellular calcium ion homeostasis	-2.74545	-0.804381	App,Cacna1a,Cacnb4,Cdk5,Dmpk,Ryr2,Slc8a1,Trpc4,Bok,Atp2a3,Trdn,Slc8a3,Tpcn2,Inpp4b,Pkhd1,Slc24a5
4_Member	GO Biological Processes	GO:0050801	monoatomic ion homeostasis	-2.67464	-0.741992	Ank3,App,Cacna1a,Cacnb4,Cckbr,Cdk5,Dmpk,Kcnh2,Kcnj16,Ryr2,Scnn1a,Slc12a2,Slc8a1,Trpc4,Atp1a4,Tfr2,Bok,Atp2a3,Car12,Trdn,Bmyc,Slc8a3,Atp6v0a4,Lacc1,Slc4a7,Tpcn2,Inpp4b,Pkhd1,Hephl1,Slc24a5
4_Member	GO Biological Processes	GO:0098771	inorganic ion homeostasis	-2.52309	-0.668984	Ank3,App,Cacna1a,Cacnb4,Cdk5,Dmpk,Kcnh2,Ryr2,Scnn1a,Sfrp4,Slc12a2,Slc8a1,Trpc4,Atp1a4,Tfr2,Bok,Atp2a3,Car12,Trdn,Bmyc,Slc8a3,Tpcn2,Inpp4b,Pkhd1,Hephl1,Slc24a5
4_Member	GO Biological Processes	GO:0030003	intracellular monoatomic cation homeostasis	-2.42875	-0.619222	App,Cacna1a,Cacnb4,Cdk5,Dmpk,Ryr2,Scnn1a,Slc12a2,Slc8a1,Trpc4,Atp1a4,Tfr2,Bok,Atp2a3,Trdn,Bmyc,Slc8a3,Atp6v0a4,Lacc1,Slc4a7,Tpcn2,Inpp4b,Pkhd1,Hephl1,Slc24a5
4_Member	GO Biological Processes	GO:0006873	intracellular monoatomic ion homeostasis	-2.2927	-0.533152	App,Cacna1a,Cacnb4,Cdk5,Dmpk,Ryr2,Scnn1a,Slc12a2,Slc8a1,Trpc4,Atp1a4,Tfr2,Bok,Atp2a3,Trdn,Bmyc,Slc8a3,Atp6v0a4,Lacc1,Slc4a7,Tpcn2,Inpp4b,Pkhd1,Hephl1,Slc24a5
4_Member	GO Biological Processes	GO:0055074	calcium ion homeostasis	-2.13666	-0.425268	App,Cacna1a,Cacnb4,Cdk5,Dmpk,Ryr2,Slc8a1,Trpc4,Bok,Atp2a3,Trdn,Slc8a3,Tpcn2,Inpp4b,Pkhd1,Slc24a5
5_Summary	KEGG Pathway	mmu04020	Calcium signaling pathway - Mus musculus (house mouse)	-6.666	-3.50163	Cacna1a,Cacna1d,Cacna1e,Camk2a,Casq1,Cckbr,Chrm3,Fgf1,Fgf9,Grm1,Oxtr,P2rx7,Pdgfa,Pdgfrb,Ptger3,Ret,Ryr2,Slc8a1,Vegfc,Atp2a3,Mcoln2,Trdn,Mylk,Slc8a3,Tpcn2,Cd4,Cdk5,C1qtnf1,Fzd2,Lpar3,Trpm4
5_Member	KEGG Pathway	mmu04020	Calcium signaling pathway - Mus musculus (house mouse)	-6.666	-3.50163	Cacna1a,Cacna1d,Cacna1e,Camk2a,Casq1,Cckbr,Chrm3,Fgf1,Fgf9,Grm1,Oxtr,P2rx7,Pdgfa,Pdgfrb,Ptger3,Ret,Ryr2,Slc8a1,Vegfc,Atp2a3,Mcoln2,Trdn,Mylk,Slc8a3,Tpcn2
5_Member	GO Biological Processes	GO:0007204	positive regulation of cytosolic calcium ion concentration	-2.41918	-0.612673	Cacna1a,Cckbr,Cd4,Cdk5,Grm1,Oxtr,P2rx7,Ptger3,Ryr2,Slc8a1,C1qtnf1,Fzd2,Lpar3,Trpm4,Slc8a3
6_Summary	GO Biological Processes	GO:0048812	neuron projection morphogenesis	-6.3228	-3.25951	Alcam,Ank3,App,Arx,Bdnf,Cacna1a,Ddr1,Camk2a,Cdk5,Dclk1,Emb,Epb41l3,Ephb2,Ephb3,Lama5,Matn2,Map6,Nog,Notch3,Robo1,Sema3c,Sema4d,Sema6b,Ugt8a,Tet1,B4galt6,Lpar3,Ssna1,Nexn,Draxin,Plppr4,Clstn3,Gpm6a,Prtg,Nyap2,Ephb1,Nrcam,Kalrn,Tctn1,Tnik,Acta1,Casq1,Pdgfrb,Fhod3,Opa3,Neurl2,Adam8,Itgb6,Map7,P2rx7,St14,Spint2,Ccdc88c,Palld,Actn1,Cxadr,Nr4a1,Ccn1,Lbp,Pdgfa,Prkcq,Ptprj,Slc12a2,Vav3,Trpm4,Cklf,Arrb2,A…
6_Member	GO Biological Processes	GO:0048812	neuron projection morphogenesis	-6.3228	-3.25951	Alcam,Ank3,App,Arx,Bdnf,Cacna1a,Ddr1,Camk2a,Cdk5,Dclk1,Emb,Epb41l3,Ephb2,Ephb3,Lama5,Matn2,Map6,Nog,Notch3,Robo1,Sema3c,Sema4d,Sema6b,Ugt8a,Tet1,B4galt6,Lpar3,Ssna1,Nexn,Draxin,Plppr4,Clstn3,Gpm6a,Prtg,Nyap2,Ephb1,Nrcam,Kalrn,Tctn1,Tnik
6_Member	GO Biological Processes	GO:0120039	plasma membrane bounded cell projection morphogenesis	-6.19814	-3.20949	Alcam,Ank3,App,Arx,Bdnf,Cacna1a,Ddr1,Camk2a,Cdk5,Dclk1,Emb,Epb41l3,Ephb2,Ephb3,Lama5,Matn2,Map6,Nog,Notch3,Robo1,Sema3c,Sema4d,Sema6b,Ugt8a,Tet1,B4galt6,Lpar3,Ssna1,Nexn,Draxin,Plppr4,Clstn3,Gpm6a,Prtg,Nyap2,Ephb1,Nrcam,Kalrn,Tctn1,Tnik
6_Member	GO Biological Processes	GO:0048858	cell projection morphogenesis	-6.03557	-3.12989	Alcam,Ank3,App,Arx,Bdnf,Cacna1a,Ddr1,Camk2a,Cdk5,Dclk1,Emb,Epb41l3,Ephb2,Ephb3,Lama5,Matn2,Map6,Nog,Notch3,Robo1,Sema3c,Sema4d,Sema6b,Ugt8a,Tet1,B4galt6,Lpar3,Ssna1,Nexn,Draxin,Plppr4,Clstn3,Gpm6a,Prtg,Nyap2,Ephb1,Nrcam,Kalrn,Tctn1,Tnik
6_Member	GO Biological Processes	GO:0032989	cellular component morphogenesis	-5.94926	-3.0798	Acta1,Alcam,Ank3,App,Arx,Bdnf,Cacna1a,Ddr1,Camk2a,Casq1,Cdk5,Dclk1,Emb,Epb41l3,Ephb2,Ephb3,Lama5,Matn2,Map6,Nog,Notch3,Pdgfrb,Robo1,Sema3c,Sema4d,Sema6b,Ugt8a,Tet1,B4galt6,Lpar3,Ssna1,Nexn,Draxin,Fhod3,Plppr4,Clstn3,Gpm6a,Prtg,Nyap2,Ephb1,Nrcam,Opa3,Neurl2,Kalrn,Tctn1,Tnik
6_Member	GO Biological Processes	GO:0032990	cell part morphogenesis	-5.88997	-3.03754	Alcam,Ank3,App,Arx,Bdnf,Cacna1a,Ddr1,Camk2a,Cdk5,Dclk1,Emb,Epb41l3,Ephb2,Ephb3,Lama5,Matn2,Map6,Nog,Notch3,Robo1,Sema3c,Sema4d,Sema6b,Ugt8a,Tet1,B4galt6,Lpar3,Ssna1,Nexn,Draxin,Plppr4,Clstn3,Gpm6a,Prtg,Nyap2,Ephb1,Nrcam,Opa3,Kalrn,Tctn1,Tnik
6_Member	GO Biological Processes	GO:0000902	cell morphogenesis	-5.5838	-2.84787	Adam8,Alcam,Ank3,App,Arx,Bdnf,Cacna1a,Ddr1,Camk2a,Cdk5,Dclk1,Emb,Epb41l3,Ephb2,Ephb3,Itgb6,Lama5,Matn2,Map6,Map7,Nog,Notch3,P2rx7,St14,Robo1,Sema3c,Sema4d,Sema6b,Spint2,Ugt8a,Tet1,B4galt6,Lpar3,Ccdc88c,Ssna1,Nexn,Draxin,Palld,Actn1,Plppr4,Clstn3,Gpm6a,Prtg,Nyap2,Ephb1,Nrcam,Kalrn,Tctn1,Tnik
6_Member	GO Biological Processes	GO:0006935	chemotaxis	-5.50961	-2.81483	Adam8,Alcam,Ank3,App,Arx,Bdnf,Cdk5,Cxadr,Emb,Ephb2,Ephb3,Nr4a1,Ccn1,Lama5,Lbp,Matn2,Nog,Notch3,Pdgfa,Pdgfrb,Prkcq,Ptprj,Robo1,Sema3c,Sema4d,Sema6b,Slc12a2,Vav3,Trpm4,Nexn,Draxin,Cklf,Arrb2,Prtg,Ephb1,Nrcam,Kalrn
6_Member	GO Biological Processes	GO:0007411	axon guidance	-5.49447	-2.81483	Alcam,Ank3,App,Arx,Bdnf,Cdk5,Emb,Ephb2,Ephb3,Lama5,Matn2,Nog,Notch3,Robo1,Sema3c,Sema4d,Sema6b,Nexn,Draxin,Prtg,Ephb1,Nrcam,Kalrn
6_Member	GO Biological Processes	GO:0097485	neuron projection guidance	-5.49447	-2.81483	Alcam,Ank3,App,Arx,Bdnf,Cdk5,Emb,Ephb2,Ephb3,Lama5,Matn2,Nog,Notch3,Robo1,Sema3c,Sema4d,Sema6b,Nexn,Draxin,Prtg,Ephb1,Nrcam,Kalrn
6_Member	GO Biological Processes	GO:0042330	taxis	-5.47039	-2.80505	Adam8,Alcam,Ank3,App,Arx,Bdnf,Cdk5,Cxadr,Emb,Ephb2,Ephb3,Nr4a1,Ccn1,Lama5,Lbp,Matn2,Nog,Notch3,Pdgfa,Pdgfrb,Prkcq,Ptprj,Robo1,Sema3c,Sema4d,Sema6b,Slc12a2,Vav3,Trpm4,Nexn,Draxin,Cklf,Arrb2,Prtg,Ephb1,Nrcam,Kalrn
6_Member	GO Biological Processes	GO:0031175	neuron projection development	-5.42733	-2.793	Alcam,Ank3,App,Arx,Bdnf,Cacna1a,Ddr1,Camk2a,Cdk5,Dclk1,Emb,Epb41l3,Ephb2,Ephb3,Atcay,Lama5,Matn2,Map6,Nog,Notch3,Ptprk,Robo1,Stmn3,Sema3c,Sema4d,Sema6b,Ugt8a,Tet1,B4galt6,Lpar3,Ssna1,Nexn,Draxin,Crtac1,Bicdl1,Alkbh1,Plppr4,Micall2,Clstn3,Gpm6a,Prtg,Nyap2,Gprin3,Cntn4,Ephb1,Nrcam,Kalrn,Tctn1,Tnik
6_Member	GO Biological Processes	GO:0040011	locomotion	-5.4072	-2.793	Adam8,Alcam,Ank3,App,Arx,Bdnf,Cdk5,Cxadr,Emb,Ephb2,Ephb3,Nr4a1,Ccn1,Lama5,Lbp,Matn2,Nog,Notch3,Pdgfa,Pdgfrb,Prkcq,Ptprj,Robo1,Sema3c,Sema4d,Sema6b,Slc12a2,Rcan2,Vav3,Trpm4,Nexn,Draxin,Cklf,Arrb2,Prtg,Ephb1,Nrcam,Kalrn
6_Member	GO Biological Processes	GO:0061564	axon development	-4.82701	-2.35895	Alcam,Ank3,App,Arx,Bdnf,Ddr1,Cdk5,Dclk1,Emb,Epb41l3,Ephb2,Ephb3,Lama5,Matn2,Nog,Notch3,Robo1,Sema3c,Sema4d,Sema6b,B4galt6,Lpar3,Ssna1,Nexn,Draxin,Crtac1,Plppr4,Prtg,Ephb1,Nrcam,Kalrn,Tctn1
6_Member	GO Biological Processes	GO:0000904	cell morphogenesis involved in differentiation	-4.66497	-2.23641	Alcam,Ank3,App,Arx,Bdnf,Cacna1a,Camk2a,Cdk5,Dclk1,Emb,Ephb2,Ephb3,Lama5,Matn2,Map6,Nog,Notch3,St14,Robo1,Sema3c,Sema4d,Sema6b,Spint2,Tet1,B4galt6,Lpar3,Ccdc88c,Ssna1,Nexn,Draxin,Palld,Actn1,Plppr4,Prtg,Ephb1,Nrcam,Kalrn,Tctn1
6_Member	GO Biological Processes	GO:0007409	axonogenesis	-4.62232	-2.20001	Alcam,Ank3,App,Arx,Bdnf,Cdk5,Dclk1,Emb,Ephb2,Ephb3,Lama5,Matn2,Nog,Notch3,Robo1,Sema3c,Sema4d,Sema6b,B4galt6,Lpar3,Ssna1,Nexn,Draxin,Plppr4,Prtg,Ephb1,Nrcam,Kalrn,Tctn1
6_Member	GO Biological Processes	GO:0048667	cell morphogenesis involved in neuron differentiation	-4.32975	-1.95607	Alcam,Ank3,App,Arx,Bdnf,Cacna1a,Camk2a,Cdk5,Dclk1,Emb,Ephb2,Ephb3,Lama5,Matn2,Map6,Nog,Notch3,Robo1,Sema3c,Sema4d,Sema6b,Tet1,B4galt6,Lpar3,Ssna1,Nexn,Draxin,Plppr4,Prtg,Ephb1,Nrcam,Kalrn,Tctn1
6_Member	GO Biological Processes	GO:0051961	negative regulation of nervous system development	-3.18	-1.08578	Bdnf,Cdk5,Cdkn2b,Ephb2,Fgf13,Ldlr,Nog,Sema3c,Sema4d,Sema6b,Sorl1,Brinp1,Draxin,Clstn3,Prtg
6_Member	GO Biological Processes	GO:0050768	negative regulation of neurogenesis	-2.85909	-0.87272	Bdnf,Cdk5,Cdkn2b,Ephb2,Fgf13,Ldlr,Nog,Sema3c,Sema4d,Sema6b,Sorl1,Brinp1,Draxin,Prtg
6_Member	GO Biological Processes	GO:0050770	regulation of axonogenesis	-2.56713	-0.697663	Bdnf,Cacna1a,Cdk5,Ephb2,Ephb3,Fgf13,Map6,Ret,Robo1,Sema3c,Sema4d,Sema6b,Lpar3,Draxin
6_Member	GO Biological Processes	GO:0045596	negative regulation of cell differentiation	-2.44389	-0.628272	Abcg1,App,Bdnf,Noct,Cdk5,Cdkn2b,Col5a1,Ephb2,Fgf13,Fgf9,G6pdx,Id3,Ldlr,Smad7,Nog,Notch3,Ptger3,Rara,Sema3c,Sema4d,Sema6b,Sorl1,Vegfc,Brinp1,Trpm4,Draxin,Lbh,Spred3,Bmyc,Pawr,Mbnl3,Mark1,Glis1,Inpp4b,Prtg,Cntn4,Ephb1,Tmem182
6_Member	GO Biological Processes	GO:0050771	negative regulation of axonogenesis	-2.16991	-0.442833	Cdk5,Ephb2,Fgf13,Sema3c,Sema4d,Sema6b,Draxin
6_Member	GO Biological Processes	GO:0048640	negative regulation of developmental growth	-2.084	-0.391781	Cdk5,Cxadr,Fgf13,G6pdx,Nog,Sema3c,Sema4d,Sema6b,Draxin,Nkd1
7_Summary	GO Biological Processes	GO:0098609	cell-cell adhesion	-6.24899	-3.23685	Adam8,Alcam,Comp,Cxadr,Emb,Ccn1,Il1rap,Itga7,Itgax,Lama5,Pkp1,Ret,Robo1,Sema4d,Stk10,Astn2,Cdon,Svep1,Nexn,Palld,Vmp1,Olr1,Lrrc4,Cd200l1,Ctnna3,Igsf21,Clstn3,Plekha7,Prtg,Sdk2,Cadm4,Nrcam,Podxl2,Il1rapl1,Itgad,Hmcn2,App,Bdnf,Ephb2,Ephb3,Crtac1,Frey1,Dock8,Ephb1
7_Member	GO Biological Processes	GO:0098609	cell-cell adhesion	-6.24899	-3.23685	Adam8,Alcam,Comp,Cxadr,Emb,Ccn1,Il1rap,Itga7,Itgax,Lama5,Pkp1,Ret,Robo1,Sema4d,Stk10,Astn2,Cdon,Svep1,Nexn,Palld,Vmp1,Olr1,Lrrc4,Cd200l1,Ctnna3,Igsf21,Clstn3,Plekha7,Prtg,Sdk2,Cadm4,Nrcam,Podxl2,Il1rapl1,Itgad,Hmcn2
7_Member	GO Biological Processes	GO:0008038	neuron recognition	-5.66231	-2.90006	App,Bdnf,Emb,Ephb2,Ephb3,Robo1,Nexn,Crtac1,Prtg,Nrcam
7_Member	GO Biological Processes	GO:0098742	cell-cell adhesion via plasma-membrane adhesion molecules	-3.86858	-1.60549	Alcam,Cxadr,Emb,Il1rap,Ret,Robo1,Nexn,Palld,Lrrc4,Igsf21,Clstn3,Prtg,Sdk2,Cadm4,Nrcam,Il1rapl1,Hmcn2
7_Member	GO Biological Processes	GO:0007156	homophilic cell adhesion via plasma membrane adhesion molecules	-3.85469	-1.59589	Emb,Ret,Robo1,Nexn,Palld,Igsf21,Clstn3,Prtg,Sdk2,Cadm4,Nrcam,Hmcn2
7_Member	GO Biological Processes	GO:0070593	dendrite self-avoidance	-3.38757	-1.24074	Emb,Nexn,Prtg,Nrcam
7_Member	GO Biological Processes	GO:0008037	cell recognition	-3.15196	-1.07059	App,Bdnf,Emb,Ephb2,Ephb3,Robo1,Nexn,Crtac1,Frey1,Dock8,Prtg,Ephb1,Nrcam
8_Summary	WikiPathways	WP553	Calcium regulation in cardiac cells	-6.11285	-3.16767	Cacna1a,Cacna1d,Cacna1e,Camk2a,Casq1,Chrm3,Gnao1,Gnb5,Prkch,Prkcq,Pkia,Ryr2,Slc8a1,Atp1a4,Rgs6,Atp2a3,Slc8a3,Arrb2,Dmpk,Trdn,Kcnh2,Kcnip1,Acta1,Fos,Oxtr,Rxfp1,Acta2,Myh3,Cacnb4,Itga7,Itgb6,Tgfb3,Prkag3,Ctnna3,Slc24a5,P2rx7
8_Member	WikiPathways	WP553	Calcium regulation in cardiac cells	-6.11285	-3.16767	Cacna1a,Cacna1d,Cacna1e,Camk2a,Casq1,Chrm3,Gnao1,Gnb5,Prkch,Prkcq,Pkia,Ryr2,Slc8a1,Atp1a4,Rgs6,Atp2a3,Slc8a3,Arrb2
8_Member	Reactome Gene Sets	R-MMU-5578775	Ion homeostasis	-4.46602	-2.06194	Camk2a,Casq1,Dmpk,Ryr2,Slc8a1,Atp1a4,Atp2a3,Trdn,Slc8a3
8_Member	Reactome Gene Sets	R-MMU-5576891	Cardiac conduction	-3.54804	-1.34134	Camk2a,Casq1,Dmpk,Kcnh2,Ryr2,Slc8a1,Atp1a4,Atp2a3,Kcnip1,Trdn,Slc8a3
8_Member	WikiPathways	WP385	Myometrial relaxation and contraction pathways	-3.52838	-1.32916	Acta1,Camk2a,Fos,Gnb5,Oxtr,Prkch,Prkcq,Pkia,Ryr2,Slc8a1,Rgs6,Atp2a3,Arrb2,Rxfp1
8_Member	Reactome Gene Sets	R-MMU-397014	Muscle contraction	-3.4103	-1.2501	Acta1,Acta2,Camk2a,Casq1,Dmpk,Kcnh2,Myh3,Ryr2,Slc8a1,Atp1a4,Atp2a3,Kcnip1,Trdn,Slc8a3
8_Member	KEGG Pathway	mmu05410	Hypertrophic cardiomyopathy - Mus musculus (house mouse)	-3.20226	-1.10217	Cacna1d,Cacnb4,Itga7,Itgb6,Ryr2,Slc8a1,Tgfb3,Atp2a3,Slc8a3,Prkag3
8_Member	KEGG Pathway	mmu05412	Arrhythmogenic right ventricular cardiomyopathy - Mus musculus (house mouse)	-3.13023	-1.05522	Cacna1d,Cacnb4,Itga7,Itgb6,Ryr2,Slc8a1,Atp2a3,Slc8a3,Ctnna3
8_Member	KEGG Pathway	mmu05414	Dilated cardiomyopathy - Mus musculus (house mouse)	-2.51772	-0.667118	Cacna1d,Cacnb4,Itga7,Itgb6,Ryr2,Slc8a1,Tgfb3,Atp2a3,Slc8a3
8_Member	Reactome Gene Sets	R-MMU-425561	Sodium/Calcium exchangers	-2.24509	-0.50013	Slc8a1,Slc8a3,Slc24a5
8_Member	KEGG Pathway	mmu04260	Cardiac muscle contraction - Mus musculus (house mouse)	-2.1889	-0.452972	Cacna1d,Cacnb4,Ryr2,Slc8a1,Atp1a4,Atp2a3,Trdn,Slc8a3
8_Member	GO Biological Processes	GO:0060402	calcium ion transport into cytosol	-2.14144	-0.427913	Ryr2,Slc8a1,Slc8a3
8_Member	Reactome Gene Sets	R-MMU-418360	Platelet calcium homeostasis	-2.06086	-0.384869	P2rx7,Slc8a1,Atp2a3,Slc8a3
8_Member	Reactome Gene Sets	R-MMU-418359	Reduction of cytosolic Ca++ levels	-2.04697	-0.384869	Slc8a1,Atp2a3,Slc8a3
9_Summary	GO Biological Processes	GO:0019722	calcium-mediated signaling	-6.08597	-3.16099	App,Cacna1d,Casq1,Cd4,Chrm3,Dmpk,Grm1,Ptprj,Ryr2,Slc8a1,Tmem38b,Ncald,Rcan2,Trpm4,Tpcn2,Tspan18,Ksr2,Rasd1,Kcnc2
9_Member	GO Biological Processes	GO:0019722	calcium-mediated signaling	-6.08597	-3.16099	App,Cacna1d,Casq1,Cd4,Chrm3,Dmpk,Grm1,Ptprj,Ryr2,Slc8a1,Tmem38b,Ncald,Rcan2,Trpm4,Tpcn2,Tspan18,Ksr2
9_Member	GO Biological Processes	GO:0019932	second-messenger-mediated signaling	-4.73571	-2.28689	App,Cacna1d,Casq1,Cd4,Chrm3,Dmpk,Grm1,Ptprj,Rasd1,Ryr2,Slc8a1,Tmem38b,Ncald,Rcan2,Trpm4,Tpcn2,Tspan18,Kcnc2,Ksr2
10_Summary	GO Biological Processes	GO:0043408	regulation of MAPK cascade	-5.84237	-3.00632	Acta2,Adam8,App,Cd4,Gadd45a,Ephb2,Fgf1,Fgf9,Fzd5,Gcnt2,Grm1,Ccn1,Itgb1bp1,Lif,Mid1,P2rx7,Pdgfa,Pdgfrb,Ptprj,Rara,Ret,Robo1,Sfrp4,Sla,Sorl1,Tgfb3,Gadd45g,Spry4,C1qtnf1,Cdon,Lpar3,Fam83d,Dusp9,Lbh,Tnfrsf23,Spred3,Ankrd6,Trim30d,Arrb2,Pkhd1,Eda2r,Dusp15,Ephb1,Dusp4,Ksr2,Nlrp12,Cracr2a,Tnik,Prdm11
10_Member	GO Biological Processes	GO:0043408	regulation of MAPK cascade	-5.84237	-3.00632	Acta2,Adam8,App,Cd4,Gadd45a,Ephb2,Fgf1,Fgf9,Fzd5,Gcnt2,Grm1,Ccn1,Itgb1bp1,Lif,Mid1,P2rx7,Pdgfa,Pdgfrb,Ptprj,Rara,Ret,Robo1,Sfrp4,Sla,Sorl1,Tgfb3,Gadd45g,Spry4,C1qtnf1,Cdon,Lpar3,Fam83d,Dusp9,Lbh,Tnfrsf23,Spred3,Ankrd6,Trim30d,Arrb2,Pkhd1,Eda2r,Dusp15,Ephb1,Dusp4,Ksr2,Nlrp12,Cracr2a,Tnik,Prdm11
10_Member	GO Biological Processes	GO:0043410	positive regulation of MAPK cascade	-3.26277	-1.14765	Acta2,Adam8,App,Cd4,Gadd45a,Fgf1,Fgf9,Fzd5,Gcnt2,Grm1,Lif,Mid1,P2rx7,Pdgfa,Pdgfrb,Ptprj,Rara,Ret,Robo1,Tgfb3,Gadd45g,C1qtnf1,Cdon,Lpar3,Ankrd6,Trim30d,Arrb2,Eda2r,Dusp15,Ksr2,Cracr2a,Tnik
10_Member	GO Biological Processes	GO:0070372	regulation of ERK1 and ERK2 cascade	-2.27183	-0.51764	Acta2,App,Cd4,Ephb2,Fgf1,Gcnt2,Ccn1,Itgb1bp1,Lif,Pdgfa,Pdgfrb,Rara,Fam83d,Spred3,Arrb2,Pkhd1,Dusp15,Ephb1,Dusp4,Nlrp12
11_Summary	GO Biological Processes	GO:0006937	regulation of muscle contraction	-5.74713	-2.95685	Casq1,Chrm3,Dmpk,Fgf13,Nr4a1,Smad7,Oxtr,Ptger3,Ryr2,Slc8a1,Tmem38b,Ehd3,Trpm4,Slc8a3,Pawr,Ctnna3,Akap6,Abat,Spx,G6pdx,Mlip,Cmya5,Prkag3,Asic2,App,Cacna1d,Cacna1e,Cxadr,Gnao1,Kcnh2,Nos1ap,Acta2
11_Member	GO Biological Processes	GO:0006937	regulation of muscle contraction	-5.74713	-2.95685	Casq1,Chrm3,Dmpk,Fgf13,Nr4a1,Smad7,Oxtr,Ptger3,Ryr2,Slc8a1,Tmem38b,Ehd3,Trpm4,Slc8a3,Pawr,Ctnna3,Akap6,Abat,Spx
11_Member	GO Biological Processes	GO:0006942	regulation of striated muscle contraction	-5.44678	-2.793	Casq1,Dmpk,Fgf13,Nr4a1,Smad7,Ryr2,Slc8a1,Tmem38b,Ehd3,Trpm4,Slc8a3,Ctnna3,Akap6
11_Member	GO Biological Processes	GO:0090257	regulation of muscle system process	-4.94964	-2.43811	Casq1,Chrm3,Dmpk,Fgf13,G6pdx,Nr4a1,Smad7,Oxtr,Ptger3,Ryr2,Slc8a1,Tmem38b,Ehd3,Trpm4,Mlip,Cmya5,Slc8a3,Pawr,Ctnna3,Akap6,Prkag3,Abat,Spx
11_Member	GO Biological Processes	GO:1903522	regulation of blood circulation	-4.315	-1.95607	Asic2,App,Cacna1d,Cacna1e,Chrm3,Cxadr,Dmpk,Fgf13,Gnao1,Kcnh2,Smad7,Oxtr,Ptger3,Ryr2,Slc8a1,Tmem38b,Ehd3,Trpm4,Nos1ap,Ctnna3,Akap6,Spx
11_Member	GO Biological Processes	GO:0008016	regulation of heart contraction	-4.2085	-1.85491	Cacna1d,Cacna1e,Chrm3,Cxadr,Dmpk,Fgf13,Gnao1,Kcnh2,Smad7,Ryr2,Slc8a1,Tmem38b,Ehd3,Trpm4,Nos1ap,Ctnna3,Akap6,Spx
11_Member	GO Biological Processes	GO:0055117	regulation of cardiac muscle contraction	-3.39268	-1.24255	Fgf13,Smad7,Ryr2,Slc8a1,Tmem38b,Ehd3,Trpm4,Ctnna3,Akap6
11_Member	GO Biological Processes	GO:0086065	cell communication involved in cardiac conduction	-3.34398	-1.21012	Cacna1d,Cxadr,Ryr2,Slc8a1,Trpm4,Ctnna3
11_Member	GO Biological Processes	GO:1903115	regulation of actin filament-based movement	-3.12122	-1.05522	Acta2,Fgf13,Ptger3,Ryr2,Trpm4,Ctnna3,Akap6
11_Member	GO Biological Processes	GO:0098901	regulation of cardiac muscle cell action potential	-2.69427	-0.759304	Cxadr,Fgf13,Ryr2,Trpm4,Ctnna3
11_Member	GO Biological Processes	GO:0061337	cardiac conduction	-2.67294	-0.741992	Cacna1d,Cxadr,Kcnh2,Ryr2,Slc8a1,Trpm4,Ctnna3
11_Member	GO Biological Processes	GO:0002027	regulation of heart rate	-2.48693	-0.664555	Cacna1d,Cacna1e,Chrm3,Kcnh2,Ryr2,Slc8a1,Trpm4,Nos1ap,Ctnna3,Spx
11_Member	GO Biological Processes	GO:0098911	regulation of ventricular cardiac muscle cell action potential	-2.24509	-0.50013	Ryr2,Trpm4,Ctnna3
11_Member	GO Biological Processes	GO:1903779	regulation of cardiac conduction	-2.24509	-0.50013	Ryr2,Ehd3,Trpm4
11_Member	GO Biological Processes	GO:0086004	regulation of cardiac muscle cell contraction	-2.12185	-0.41674	Fgf13,Ryr2,Trpm4,Ctnna3,Akap6
12_Summary	GO Biological Processes	GO:0015812	gamma-aminobutyric acid transport	-5.61147	-2.86257	Cacna1a,Cacnb4,Slc6a13,P2rx7,Slc6a6,Trpc4,Cckbr,Abcb4,Bdnf,Gabrb3,Slc12a2,Camk2a,Epb41l3,Fgf13,Maoa
12_Member	GO Biological Processes	GO:0015812	gamma-aminobutyric acid transport	-5.61147	-2.86257	Cacna1a,Cacnb4,Slc6a13,P2rx7,Slc6a6,Trpc4
12_Member	GO Biological Processes	GO:0014051	gamma-aminobutyric acid secretion	-4.19282	-1.84818	Cacna1a,Cacnb4,P2rx7,Trpc4
12_Member	GO Biological Processes	GO:0046717	acid secretion	-3.26855	-1.15036	Cacna1a,Cacnb4,Cckbr,P2rx7,Abcb4,Trpc4
12_Member	GO Biological Processes	GO:0007214	gamma-aminobutyric acid signaling pathway	-2.62645	-0.736152	Bdnf,Cacna1a,Cacnb4,Gabrb3,Slc12a2
12_Member	WikiPathways	WP5298	Dravet syndrome: Scn1a-A1783V point mutation model	-2.10392	-0.40888	Cacna1a,Cacnb4,Camk2a,Epb41l3,Fgf13,Gabrb3,Maoa
13_Summary	GO Biological Processes	GO:0003254	regulation of membrane depolarization	-5.40883	-2.793	Ank3,Cacna1d,Fgf12,Fhl1,Gclm,Smad7,P2rx7,Bok,Trpm4,Nedd4l,Cacnb4,Glra1,Kcnh2,Ryr2,Scn8a,Kcnc2,Nrcam,Cacna1a,Cacna1e
13_Member	GO Biological Processes	GO:0003254	regulation of membrane depolarization	-5.40883	-2.793	Ank3,Cacna1d,Fgf12,Fhl1,Gclm,Smad7,P2rx7,Bok,Trpm4,Nedd4l
13_Member	GO Biological Processes	GO:0001508	action potential	-3.97528	-1.6856	Ank3,Cacna1d,Cacnb4,Glra1,Kcnh2,P2rx7,Ryr2,Scn8a,Trpm4,Nedd4l,Kcnc2,Nrcam
13_Member	GO Biological Processes	GO:1904181	positive regulation of membrane depolarization	-2.98011	-0.963121	Ank3,Cacna1d,P2rx7,Trpm4
13_Member	GO Biological Processes	GO:0019226	transmission of nerve impulse	-2.37653	-0.584791	Ank3,Cacna1a,Cacna1e,Cacnb4,Glra1,P2rx7,Scn8a,Nrcam
13_Member	GO Biological Processes	GO:0086001	cardiac muscle cell action potential	-2.22016	-0.477795	Cacna1d,Kcnh2,Ryr2,Trpm4,Nedd4l
13_Member	GO Biological Processes	GO:0086010	membrane depolarization during action potential	-2.12254	-0.41674	Cacna1d,Kcnh2,Scn8a,Trpm4
13_Member	GO Biological Processes	GO:0051899	membrane depolarization	-2.06884	-0.384869	Cacna1a,Cacna1d,Kcnh2,P2rx7,Scn8a,Trpm4
14_Summary	Reactome Gene Sets	R-MMU-1474244	Extracellular matrix organization	-5.2971	-2.71093	Adam12,Adam8,App,Ddr1,Capn1,Col12a1,Col15a1,Col4a5,Col5a1,Comp,Ncan,P3h3,Itgax,Itgb6,Mmp12,Adamts5,Col5a3,P3h1,Capn9,Col16a1,Optc,Adamts3,Adamts1,Ccn1,Matn2,Spint2,Tmem38b,Adamtsl1,Adamtsl2,Sh3pxd2b,Rxfp1,Colq,Slc7a7,Slc8a1,Atp1a4,Slc7a8,Slc8a3,Cpa2
14_Member	Reactome Gene Sets	R-MMU-1474244	Extracellular matrix organization	-5.2971	-2.71093	Adam12,Adam8,App,Ddr1,Capn1,Col12a1,Col15a1,Col4a5,Col5a1,Comp,Ncan,P3h3,Itgax,Itgb6,Mmp12,Adamts5,Col5a3,P3h1,Capn9,Col16a1,Optc,Adamts3
14_Member	GO Biological Processes	GO:0030198	extracellular matrix organization	-4.1011	-1.77321	Adamts1,App,Col15a1,Col4a5,Col5a1,Comp,Ccn1,Matn2,Mmp12,Spint2,Adamts5,Tmem38b,Col5a3,P3h1,Adamtsl1,Adamtsl2,Col16a1,Sh3pxd2b,Optc,Adamts3,Rxfp1,Colq
14_Member	GO Biological Processes	GO:0043062	extracellular structure organization	-4.05507	-1.74671	Adamts1,App,Col15a1,Col4a5,Col5a1,Comp,Ccn1,Matn2,Mmp12,Spint2,Adamts5,Tmem38b,Col5a3,P3h1,Adamtsl1,Adamtsl2,Col16a1,Sh3pxd2b,Optc,Adamts3,Rxfp1,Colq
14_Member	GO Biological Processes	GO:0045229	external encapsulating structure organization	-4.05507	-1.74671	Adamts1,App,Col15a1,Col4a5,Col5a1,Comp,Ccn1,Matn2,Mmp12,Spint2,Adamts5,Tmem38b,Col5a3,P3h1,Adamtsl1,Adamtsl2,Col16a1,Sh3pxd2b,Optc,Adamts3,Rxfp1,Colq
14_Member	Reactome Gene Sets	R-MMU-1650814	Collagen biosynthesis and modifying enzymes	-3.96025	-1.67511	Col12a1,Col15a1,Col4a5,Col5a1,P3h3,Col5a3,P3h1,Col16a1,Adamts3
14_Member	KEGG Pathway	mmu04974	Protein digestion and absorption - Mus musculus (house mouse)	-3.7769	-1.5348	Col12a1,Col15a1,Col4a5,Col5a1,Slc7a7,Slc8a1,Atp1a4,Slc7a8,Col5a3,Col16a1,Slc8a3,Cpa2
14_Member	Reactome Gene Sets	R-MMU-3000178	ECM proteoglycans	-3.48571	-1.30109	App,Col5a1,Comp,Ncan,Itgax,Itgb6,Col5a3
14_Member	Reactome Gene Sets	R-MMU-1474290	Collagen formation	-3.30198	-1.17129	Col12a1,Col15a1,Col4a5,Col5a1,P3h3,Col5a3,P3h1,Col16a1,Adamts3
14_Member	Reactome Gene Sets	R-MMU-1474228	Degradation of the extracellular matrix	-3.21792	-1.11165	Adam8,Capn1,Col12a1,Col15a1,Col4a5,Col5a1,Mmp12,Adamts5,Col5a3,Capn9,Optc
14_Member	Reactome Gene Sets	R-MMU-8948216	Collagen chain trimerization	-2.32555	-0.559208	Col12a1,Col15a1,Col5a1,Col5a3,Col16a1
14_Member	Reactome Gene Sets	R-MMU-216083	Integrin cell surface interactions	-2.31013	-0.54714	Col4a5,Col5a1,Comp,Itgax,Itgb6,Col5a3,Col16a1
14_Member	Reactome Gene Sets	R-MMU-1442490	Collagen degradation	-2.10653	-0.40888	Col12a1,Col15a1,Col4a5,Col5a1,Mmp12,Col5a3
15_Summary	GO Biological Processes	GO:0050807	regulation of synapse organization	-5.25244	-2.67523	Asic2,App,Bdnf,Cdk5,Ncan,Cux2,Dmpk,Ephb2,Ephb3,Grid1,Il1rap,Nedd9,Oxtr,Sema4d,Cttnbp2,Magi2,Etv5,Lrrtm3,Arhgap44,Clstn3,Gpm6a,Ephb1,Nrcam,Il1rapl1,Colq,Kalrn,Itgb1bp1,Ptprj,Col16a1,Fzd5,Prkch,Limch1,Nedd4l,Cdkn2b,Fgf13,Itgax,Ldlr,Lif,Map6,Nog,Rara,Robo1,Sema3c,Sema6b,Sorl1,Vegfc,Brinp1,Cdon,Lpar3,Draxin,Slc25a12,Prtg,Tnik,Adamts1,Cacna1a,Ddr1,Myo10,P2rx7,Prkcq,Ret,Rp1,Spock1,Tgfb3,P3h1,Gprc5b,Mar…
15_Member	GO Biological Processes	GO:0050807	regulation of synapse organization	-5.25244	-2.67523	Asic2,App,Bdnf,Cdk5,Ncan,Cux2,Dmpk,Ephb2,Ephb3,Grid1,Il1rap,Nedd9,Oxtr,Sema4d,Cttnbp2,Magi2,Etv5,Lrrtm3,Arhgap44,Clstn3,Gpm6a,Ephb1,Nrcam,Il1rapl1,Colq,Kalrn
15_Member	GO Biological Processes	GO:0051965	positive regulation of synapse assembly	-5.09117	-2.53134	Asic2,Bdnf,Cux2,Ephb2,Ephb3,Il1rap,Oxtr,Sema4d,Lrrtm3,Clstn3,Ephb1,Il1rapl1
15_Member	GO Biological Processes	GO:0050803	regulation of synapse structure or activity	-5.05112	-2.49971	Asic2,App,Bdnf,Cdk5,Ncan,Cux2,Dmpk,Ephb2,Ephb3,Grid1,Il1rap,Nedd9,Oxtr,Sema4d,Cttnbp2,Magi2,Etv5,Lrrtm3,Arhgap44,Clstn3,Gpm6a,Ephb1,Nrcam,Il1rapl1,Colq,Kalrn
15_Member	GO Biological Processes	GO:1901890	positive regulation of cell junction assembly	-4.89385	-2.41399	Asic2,Bdnf,Cux2,Ephb2,Ephb3,Il1rap,Itgb1bp1,Oxtr,Ptprj,Sema4d,Col16a1,Lrrtm3,Clstn3,Ephb1,Il1rapl1
15_Member	GO Biological Processes	GO:1901888	regulation of cell junction assembly	-4.47348	-2.06341	Asic2,App,Bdnf,Cux2,Ephb2,Ephb3,Fzd5,Il1rap,Itgb1bp1,Oxtr,Prkch,Ptprj,Sema4d,Limch1,Nedd4l,Col16a1,Lrrtm3,Clstn3,Ephb1,Il1rapl1,Colq
15_Member	GO Biological Processes	GO:0051960	regulation of nervous system development	-4.08244	-1.76407	Asic2,Bdnf,Cdk5,Cdkn2b,Ncan,Cux2,Ephb2,Ephb3,Fgf13,Il1rap,Itgax,Ldlr,Lif,Map6,Nog,Oxtr,Prkch,Rara,Robo1,Sema3c,Sema4d,Sema6b,Sorl1,Vegfc,Brinp1,Cdon,Lpar3,Draxin,Slc25a12,Etv5,Lrrtm3,Clstn3,Prtg,Ephb1,Il1rapl1,Kalrn,Tnik
15_Member	GO Biological Processes	GO:0051963	regulation of synapse assembly	-3.81193	-1.56571	Asic2,App,Bdnf,Cux2,Ephb2,Ephb3,Il1rap,Oxtr,Sema4d,Lrrtm3,Clstn3,Ephb1,Il1rapl1,Colq
15_Member	GO Biological Processes	GO:0051962	positive regulation of nervous system development	-2.78562	-0.831316	Asic2,Bdnf,Ncan,Cux2,Ephb2,Ephb3,Il1rap,Lif,Map6,Nog,Oxtr,Prkch,Robo1,Sema4d,Vegfc,Cdon,Lpar3,Etv5,Lrrtm3,Clstn3,Ephb1,Il1rapl1,Kalrn,Tnik
15_Member	GO Biological Processes	GO:0099175	regulation of postsynapse organization	-2.78486	-0.831316	App,Cdk5,Ncan,Cux2,Ephb2,Grid1,Il1rap,Nedd9,Arhgap44,Nrcam,Il1rapl1,Kalrn
15_Member	GO Biological Processes	GO:0050767	regulation of neurogenesis	-2.3485	-0.575244	Bdnf,Cdk5,Cdkn2b,Ncan,Cux2,Ephb2,Fgf13,Ldlr,Lif,Map6,Nog,Prkch,Robo1,Sema3c,Sema4d,Sema6b,Sorl1,Vegfc,Brinp1,Cdon,Lpar3,Draxin,Etv5,Prtg,Il1rapl1,Kalrn,Tnik
15_Member	GO Biological Processes	GO:0120035	regulation of plasma membrane bounded cell projection organization	-2.2326	-0.488937	Adamts1,App,Bdnf,Cacna1a,Ddr1,Cdk5,Cux2,Ephb2,Ephb3,Fgf13,Lif,Map6,Myo10,Nedd9,P2rx7,Prkcq,Ret,Robo1,Rp1,Sema3c,Sema4d,Sema6b,Spock1,Tgfb3,Magi2,P3h1,Gprc5b,Lpar3,Draxin,Nedd4l,Arhgap44,Mark1,Gpm6a,Prag1,Nrcam,Il1rapl1,Kalrn,Tnik
15_Member	GO Biological Processes	GO:0010975	regulation of neuron projection development	-2.17545	-0.443339	Adamts1,Bdnf,Cacna1a,Ddr1,Cdk5,Cux2,Ephb2,Ephb3,Fgf13,Lif,Map6,Ret,Robo1,Sema3c,Sema4d,Sema6b,Spock1,Magi2,P3h1,Gprc5b,Lpar3,Draxin,Nedd4l,Arhgap44,Mark1,Prag1,Nrcam,Il1rapl1,Kalrn,Tnik
15_Member	GO Biological Processes	GO:0031344	regulation of cell projection organization	-2.11135	-0.40888	Adamts1,App,Bdnf,Cacna1a,Ddr1,Cdk5,Cux2,Ephb2,Ephb3,Fgf13,Lif,Map6,Myo10,Nedd9,P2rx7,Prkcq,Ret,Robo1,Rp1,Sema3c,Sema4d,Sema6b,Spock1,Tgfb3,Magi2,P3h1,Gprc5b,Lpar3,Draxin,Nedd4l,Arhgap44,Mark1,Gpm6a,Prag1,Nrcam,Il1rapl1,Kalrn,Tnik
16_Summary	GO Biological Processes	GO:0006468	protein phosphorylation	-4.89695	-2.41399	Speg,App,Bdnf,Ddr1,Camk2a,Cd4,Cdk5,Csf2ra,Dapk2,Dclk1,Dmpk,Ephb2,Ephb3,Brd2,Hck,Lif,Smad7,P2rx7,Pdgfrb,Prkch,Prkcq,Rara,Ret,Rps6ka1,Stk10,Plk4,Tec,Cdon,Gprc5b,Dclk2,Nuak2,Fam20c,Mylk,Alpk2,Mapk4,Mark1,Glyctk,Prkag3,Prag1,Dclk3,Ephb1,Mast4,Ksr2,Cdkl4,Kalrn,Tnik
16_Member	GO Biological Processes	GO:0006468	protein phosphorylation	-4.89695	-2.41399	Speg,App,Bdnf,Ddr1,Camk2a,Cd4,Cdk5,Csf2ra,Dapk2,Dclk1,Dmpk,Ephb2,Ephb3,Brd2,Hck,Lif,Smad7,P2rx7,Pdgfrb,Prkch,Prkcq,Rara,Ret,Rps6ka1,Stk10,Plk4,Tec,Cdon,Gprc5b,Dclk2,Nuak2,Fam20c,Mylk,Alpk2,Mapk4,Mark1,Glyctk,Prkag3,Prag1,Dclk3,Ephb1,Mast4,Ksr2,Cdkl4,Kalrn,Tnik
17_Summary	Reactome Gene Sets	R-MMU-112316	Neuronal System	-4.81064	-2.34942	Cacna1a,Cacnb4,Camk2a,Epb41l3,Gabrb3,Slc6a13,Glra1,Gnb5,Grm1,Il1rap,Kcnab1,Kcnab2,Kcnh2,Kcnj16,Maoa,Rps6ka1,Syn1,Ncald,Slc5a7,Grik4,Lrrtm3,Grip2,Dlgap2,Kcnc2,Abat,Tomt,Naalad2,Colq,Cacna1e,Nr4a1,P2rx7,Slc18a1,Syt12,Mctp2,Dgki
17_Member	Reactome Gene Sets	R-MMU-112316	Neuronal System	-4.81064	-2.34942	Cacna1a,Cacnb4,Camk2a,Epb41l3,Gabrb3,Slc6a13,Glra1,Gnb5,Grm1,Il1rap,Kcnab1,Kcnab2,Kcnh2,Kcnj16,Maoa,Rps6ka1,Syn1,Ncald,Slc5a7,Grik4,Lrrtm3,Grip2,Dlgap2,Kcnc2,Abat,Tomt
17_Member	GO Biological Processes	GO:0042135	neurotransmitter catabolic process	-4.67559	-2.24069	Maoa,Naalad2,Abat,Colq,Tomt
17_Member	GO Biological Processes	GO:0042133	neurotransmitter metabolic process	-3.86857	-1.60549	Maoa,Slc5a7,Naalad2,Abat,Colq,Tomt
17_Member	Reactome Gene Sets	R-MMU-112315	Transmission across Chemical Synapses	-3.60277	-1.38458	Cacna1a,Cacnb4,Camk2a,Gabrb3,Slc6a13,Glra1,Gnb5,Kcnj16,Maoa,Rps6ka1,Syn1,Ncald,Slc5a7,Grik4,Grip2,Abat,Tomt
17_Member	GO Biological Processes	GO:0001505	regulation of neurotransmitter levels	-2.77656	-0.827212	Cacna1a,Cacna1e,Cacnb4,Camk2a,Nr4a1,Maoa,P2rx7,Syn1,Slc5a7,Naalad2,Slc18a1,Syt12,Mctp2,Abat,Dgki,Colq,Tomt
18_Summary	GO Biological Processes	GO:0098900	regulation of action potential	-4.73475	-2.28689	Ank3,Cxadr,Fgf12,Fgf13,Kcnab2,Ryr2,Trpc4,Trpm4,Kcnip1,Pawr,Ctnna3
18_Member	GO Biological Processes	GO:0098900	regulation of action potential	-4.73475	-2.28689	Ank3,Cxadr,Fgf12,Fgf13,Kcnab2,Ryr2,Trpc4,Trpm4,Kcnip1,Pawr,Ctnna3
18_Member	GO Biological Processes	GO:0045760	positive regulation of action potential	-2.86617	-0.875641	Ank3,Trpm4,Kcnip1,Pawr
19_Summary	GO Biological Processes	GO:0006814	sodium ion transport	-4.56965	-2.1535	Asic2,Fgf13,Slc6a13,Scn8a,Scnn1a,Slc12a2,Slc20a1,Slc8a1,Slc6a6,Atp1a4,Slc5a7,Trpm4,Slc10a6,Nedd4l,Slc8a3,Slc4a7,Tpcn2,Slc24a5,Abcg1,Atp10a,Camk2a,Casq1,Emb,Gnb5,Ldlr,Abcb4,Ryr2,Slc7a7,Trpc4,Tfr2,Slc7a8,Atp2a3,Slc1a4,Mcoln2,Nipal3,Trdn,Slco3a1,Slc18a1,Atp6v0a4,Slc2a10,Unc79,Slc41a2,Angptl8
19_Member	GO Biological Processes	GO:0006814	sodium ion transport	-4.56965	-2.1535	Asic2,Fgf13,Slc6a13,Scn8a,Scnn1a,Slc12a2,Slc20a1,Slc8a1,Slc6a6,Atp1a4,Slc5a7,Trpm4,Slc10a6,Nedd4l,Slc8a3,Slc4a7,Tpcn2,Slc24a5
19_Member	Reactome Gene Sets	R-MMU-382551	Transport of small molecules	-3.99681	-1.70253	Abcg1,Asic2,Atp10a,Camk2a,Casq1,Emb,Slc6a13,Gnb5,Ldlr,Abcb4,Ryr2,Scnn1a,Slc12a2,Slc20a1,Slc7a7,Slc8a1,Slc6a6,Trpc4,Atp1a4,Tfr2,Slc7a8,Atp2a3,Slc1a4,Slc5a7,Mcoln2,Trpm4,Nipal3,Slc10a6,Trdn,Slco3a1,Slc18a1,Slc8a3,Atp6v0a4,Slc2a10,Unc79,Tpcn2,Slc24a5,Slc41a2,Angptl8
19_Member	GO Biological Processes	GO:0035725	sodium ion transmembrane transport	-3.70108	-1.4671	Asic2,Slc6a13,Scn8a,Scnn1a,Slc12a2,Slc8a1,Slc6a6,Atp1a4,Trpm4,Slc8a3,Tpcn2,Slc24a5
19_Member	Reactome Gene Sets	R-MMU-425407	SLC-mediated transmembrane transport	-3.21769	-1.11165	Emb,Slc6a13,Slc12a2,Slc20a1,Slc7a7,Slc8a1,Slc6a6,Slc7a8,Slc1a4,Slc5a7,Slc10a6,Slco3a1,Slc18a1,Slc8a3,Slc2a10,Slc24a5,Slc41a2
19_Member	Reactome Gene Sets	R-MMU-425393	Transport of inorganic cations/anions and amino acids/oligopeptides	-2.36672	-0.580871	Slc12a2,Slc20a1,Slc7a7,Slc8a1,Slc6a6,Slc7a8,Slc1a4,Slc8a3,Slc24a5
19_Member	GO Biological Processes	GO:0098719	sodium ion import across plasma membrane	-2.32774	-0.559208	Scnn1a,Slc12a2,Slc8a1,Trpm4
19_Member	GO Biological Processes	GO:0006883	intracellular sodium ion homeostasis	-2.00208	-0.354808	Scnn1a,Slc12a2,Slc8a1,Atp1a4
20_Summary	GO Biological Processes	GO:0061061	muscle structure development	-4.44303	-2.04485	Acta1,Speg,Smyd1,Cacnb4,Casq1,Cdk5,Comp,Cxadr,Fhl1,Fos,Nr4a1,Id3,Lama5,Lif,Smad7,Nog,Pdgfrb,Rara,Ryr2,Scn8a,Slc8a1,Adamts5,Dysf,Sirt6,Pdlim1,Fzd2,Jph1,Cdon,Pdlim7,Mylk,Actn1,Fhod3,Alpk2,Sorbs2,Tmem182,Neurl2,Eya1,Eya2,Fgf1,Fgf9,Sema3c,Schip1,Adamts1,Col5a1,Ccn1,Ptprj,Robo1,Tmem100,Rbm20,Hdac9,Adap2,Sh3pxd2b,Arx,Map7,Tmem38b
20_Member	GO Biological Processes	GO:0061061	muscle structure development	-4.44303	-2.04485	Acta1,Speg,Smyd1,Cacnb4,Casq1,Cdk5,Comp,Cxadr,Fhl1,Fos,Nr4a1,Id3,Lama5,Lif,Smad7,Nog,Pdgfrb,Rara,Ryr2,Scn8a,Slc8a1,Adamts5,Dysf,Sirt6,Pdlim1,Fzd2,Jph1,Cdon,Pdlim7,Mylk,Actn1,Fhod3,Alpk2,Sorbs2,Tmem182,Neurl2
20_Member	GO Biological Processes	GO:0060537	muscle tissue development	-3.52016	-1.32463	Acta1,Speg,Smyd1,Cdk5,Cxadr,Eya1,Eya2,Fgf1,Fgf9,Fos,Nr4a1,Smad7,Nog,Pdgfrb,Rara,Ryr2,Sema3c,Slc8a1,Dysf,Schip1,Sirt6,Cdon,Mylk,Fhod3,Alpk2,Sorbs2
20_Member	GO Biological Processes	GO:0014706	striated muscle tissue development	-3.15047	-1.07059	Speg,Cxadr,Eya1,Eya2,Fgf1,Fgf9,Smad7,Nog,Pdgfrb,Rara,Ryr2,Sema3c,Slc8a1,Sirt6,Fhod3,Alpk2,Sorbs2
20_Member	GO Biological Processes	GO:0055001	muscle cell development	-2.89407	-0.896173	Acta1,Speg,Cacnb4,Casq1,Comp,Cxadr,Pdgfrb,Slc8a1,Dysf,Actn1,Fhod3,Alpk2,Sorbs2,Tmem182,Neurl2
20_Member	GO Biological Processes	GO:0007517	muscle organ development	-2.55473	-0.692161	Acta1,Smyd1,Cdk5,Fhl1,Fos,Nr4a1,Id3,Lama5,Lif,Smad7,Nog,Ryr2,Scn8a,Dysf,Sirt6,Fzd2,Jph1,Cdon,Mylk,Tmem182
20_Member	GO Biological Processes	GO:0007507	heart development	-2.40585	-0.604684	Adamts1,Speg,Smyd1,Col5a1,Cxadr,Eya1,Fgf1,Fgf9,Id3,Ccn1,Smad7,Nog,Pdgfrb,Ptprj,Rara,Robo1,Ryr2,Sema3c,Slc8a1,Adamts5,Sirt6,Pdlim1,Fzd2,Pdlim7,Tmem100,Rbm20,Hdac9,Adap2,Fhod3,Alpk2,Sorbs2,Sh3pxd2b
20_Member	GO Biological Processes	GO:0035265	organ growth	-2.40374	-0.604684	Arx,Comp,Cxadr,Fgf1,Fgf9,Map7,Pdgfrb,Rara,Sirt6,Tmem38b,Sorbs2
20_Member	GO Biological Processes	GO:0051146	striated muscle cell differentiation	-2.30029	-0.539385	Acta1,Speg,Casq1,Cxadr,Pdgfrb,Rara,Slc8a1,Adamts5,Dysf,Sirt6,Cdon,Fhod3,Alpk2,Sorbs2,Tmem182,Neurl2
20_Member	GO Biological Processes	GO:0042692	muscle cell differentiation	-2.10608	-0.40888	Acta1,Speg,Cacnb4,Casq1,Comp,Cxadr,Pdgfrb,Rara,Slc8a1,Adamts5,Dysf,Sirt6,Cdon,Actn1,Fhod3,Alpk2,Sorbs2,Tmem182,Neurl2
20_Member	GO Biological Processes	GO:0048738	cardiac muscle tissue development	-2.05571	-0.384869	Speg,Cxadr,Fgf1,Fgf9,Smad7,Nog,Pdgfrb,Rara,Ryr2,Slc8a1,Sirt6,Fhod3,Alpk2,Sorbs2

## Sheet: Cluster 2
GroupID	Category	Term	Description	LogP	Log(q-value)	Symbols
1_Summary	Reactome Gene Sets	R-MMU-72766	Translation	-76.5978	-72.3303	Rplp0,Eef1a1,Eef2,Eif4a1,Eif4ebp1,Mrps33,Rpsa,Rps2,Rpl18,Rpl19,Rpl21,Rpl22,Mrpl23,Rpl26,Rpl27,Rpl28,Rpl29,Rpl30,Rpl32,Rpl37a,Rpl36a,Rpl6,Rpl7,Rpl9,Rps12,Rps14,Rps15,Rps16,Rps17,Rps18,Rps19,Rps24,Rps29,Rps3a1,Rps4x,Rps5,Rps6,Rps7,Rps8,Srp14,Rpl13a,Uba52,Ubb,Mrps12,Rpl27a,Rpl8,Rps3,Srp9,Rps11,Rpl3,Rps26,Mrpl17,Mrps7,Eif3g,Rps28,Eif3i,Eef1b2,Rplp1,Mrpl12,Mrpl19,Eif3c,Rps27,Rpl35a,Mrps23,Mrps14,Mrps2…
1_Member	Reactome Gene Sets	R-MMU-72766	Translation	-76.5978	-72.3303	Rplp0,Eef1a1,Eef2,Eif4a1,Eif4ebp1,Mrps33,Rpsa,Rps2,Rpl18,Rpl19,Rpl21,Rpl22,Mrpl23,Rpl26,Rpl27,Rpl28,Rpl29,Rpl30,Rpl32,Rpl37a,Rpl36a,Rpl6,Rpl7,Rpl9,Rps12,Rps14,Rps15,Rps16,Rps17,Rps18,Rps19,Rps24,Rps29,Rps3a1,Rps4x,Rps5,Rps6,Rps7,Rps8,Srp14,Rpl13a,Uba52,Ubb,Mrps12,Rpl27a,Rpl8,Rps3,Srp9,Rps11,Rpl3,Rps26,Mrpl17,Mrps7,Eif3g,Rps28,Eif3i,Eef1b2,Rplp1,Mrpl12,Mrpl19,Eif3c,Rps27,Rpl35a,Mrps23,Mrps14,Mrps2…
1_Member	Reactome Gene Sets	R-MMU-1799339	SRP-dependent cotranslational protein targeting to membrane	-69.0131	-65.1847	Rplp0,Rpsa,Rps2,Rpl18,Rpl19,Rpl21,Rpl22,Rpl26,Rpl27,Rpl28,Rpl29,Rpl30,Rpl32,Rpl37a,Rpl36a,Rpl6,Rpl7,Rpl9,Rps12,Rps14,Rps15,Rps16,Rps17,Rps18,Rps19,Rps24,Rps29,Rps3a1,Rps4x,Rps5,Rps6,Rps7,Rps8,Srp14,Rpl13a,Uba52,Ubb,Rpl27a,Rpl8,Rps3,Srp9,Rps11,Rpl3,Rps26,Rps28,Rplp1,Rps27,Rpl35a,Rpl23,Rps23,Rpl15,Rps21,Rpl36al,Rpl35,Rpl11,Rps10,Rpl14,Rplp2,Rpl39,Rpl37,Rps20,Rpl38,Rpl4,Rps27l,Rpl22l1,Rps13,Rpl39l,R…
1_Member	Reactome Gene Sets	R-MMU-72689	Formation of a pool of free 40S subunits	-68.975	-65.1847	Rplp0,Rpsa,Rps2,Rpl18,Rpl19,Rpl21,Rpl22,Rpl26,Rpl27,Rpl28,Rpl29,Rpl30,Rpl32,Rpl37a,Rpl36a,Rpl6,Rpl7,Rpl9,Rps12,Rps14,Rps15,Rps16,Rps17,Rps18,Rps19,Rps24,Rps29,Rps3a1,Rps4x,Rps5,Rps6,Rps7,Rps8,Rpl13a,Uba52,Ubb,Rpl27a,Rpl8,Rps3,Rps11,Rpl3,Rps26,Eif3g,Rps28,Eif3i,Rplp1,Eif3c,Rps27,Rpl35a,Rpl23,Eif3f,Eif1ax,Rps23,Rpl15,Rps21,Rpl36al,Rpl35,Rpl11,Rps10,Rpl14,Rplp2,Rpl39,Rpl37,Rps20,Rpl38,Rpl4,Rps27l,Rp…
1_Member	WikiPathways	WP163	Cytoplasmic ribosomal proteins	-65.7172	-62.0518	Rplp0,Fau,Rpsa,Rps2,Rpl10a,Rpl18,Rpl19,Rpl21,Rpl22,Rpl26,Rpl27,Rpl28,Rpl29,Rpl30,Rpl32,Rpl37a,Rpl36a,Rpl6,Rpl7,Rpl9,Rps12,Rps14,Rps15,Rps16,Rps17,Rps18,Rps19,Rps24,Rps29,Rps3a1,Rps4x,Rps5,Rps6,Rps7,Rps8,Rpl13a,Rpl27a,Rpl8,Rps3,Rpl7a,Rps11,Rpl3,Rps26,Rps28,Rpl36,Rplp1,Rps27,Rpl35a,Rps23,Rpl15,Rps21,Rpl35,Rpl11,Rps10,Rpl39,Rpl37,Rps20,Rpl38,Rpl4,Rpl41,Rps13,Rpl24,Rpl34,Rps25,Rpl18a,Rps27a,Rpl10,Rpl…
1_Member	Reactome Gene Sets	R-MMU-156827	L13a-mediated translational silencing of Ceruloplasmin expression	-65.5307	-61.9623	Rplp0,Eif4a1,Rpsa,Rps2,Rpl18,Rpl19,Rpl21,Rpl22,Rpl26,Rpl27,Rpl28,Rpl29,Rpl30,Rpl32,Rpl37a,Rpl36a,Rpl6,Rpl7,Rpl9,Rps12,Rps14,Rps15,Rps16,Rps17,Rps18,Rps19,Rps24,Rps29,Rps3a1,Rps4x,Rps5,Rps6,Rps7,Rps8,Rpl13a,Uba52,Ubb,Rpl27a,Rpl8,Rps3,Rps11,Rpl3,Rps26,Eif3g,Rps28,Eif3i,Rplp1,Eif3c,Rps27,Rpl35a,Rpl23,Eif3f,Eif1ax,Rps23,Rpl15,Rps21,Rpl36al,Rpl35,Rpl11,Rps10,Rpl14,Rplp2,Eif2s2,Rpl39,Rpl37,Rps20,Rpl38,…
1_Member	Reactome Gene Sets	R-MMU-72706	GTP hydrolysis and joining of the 60S ribosomal subunit	-64.9274	-61.4381	Rplp0,Eif4a1,Rpsa,Rps2,Rpl18,Rpl19,Rpl21,Rpl22,Rpl26,Rpl27,Rpl28,Rpl29,Rpl30,Rpl32,Rpl37a,Rpl36a,Rpl6,Rpl7,Rpl9,Rps12,Rps14,Rps15,Rps16,Rps17,Rps18,Rps19,Rps24,Rps29,Rps3a1,Rps4x,Rps5,Rps6,Rps7,Rps8,Rpl13a,Uba52,Ubb,Rpl27a,Rpl8,Rps3,Rps11,Rpl3,Rps26,Eif3g,Rps28,Eif3i,Rplp1,Eif3c,Rps27,Rpl35a,Rpl23,Eif3f,Eif1ax,Rps23,Rpl15,Rps21,Rpl36al,Rpl35,Rpl11,Rps10,Rpl14,Rplp2,Eif2s2,Rpl39,Rpl37,Rps20,Rpl38,…
1_Member	Reactome Gene Sets	R-MMU-975956	Nonsense Mediated Decay (NMD) independent of the Exon Junction Complex (EJC)	-63.8801	-60.4578	Rplp0,Rpsa,Rps2,Rpl18,Rpl19,Rpl21,Rpl22,Rpl26,Rpl27,Rpl28,Rpl29,Rpl30,Rpl32,Rpl37a,Rpl36a,Rpl6,Rpl7,Rpl9,Rps12,Rps14,Rps15,Rps16,Rps17,Rps18,Rps19,Rps24,Rps29,Rps3a1,Rps4x,Rps5,Rps6,Rps7,Rps8,Rpl13a,Uba52,Ubb,Rpl27a,Rpl8,Rps3,Rps11,Rpl3,Rps26,Rps28,Rplp1,Rps27,Rpl35a,Rpl23,Rps23,Rpl15,Rps21,Rpl36al,Rpl35,Rpl11,Rps10,Rpl14,Rplp2,Rpl39,Rpl37,Rps20,Rpl38,Rpl4,Rps27l,Rpl22l1,Rps13,Rpl39l,Rpl24,Rpl34,…
1_Member	Reactome Gene Sets	R-MMU-72613	Eukaryotic Translation Initiation	-62.4784	-59.1653	Rplp0,Eif4a1,Eif4ebp1,Rpsa,Rps2,Rpl18,Rpl19,Rpl21,Rpl22,Rpl26,Rpl27,Rpl28,Rpl29,Rpl30,Rpl32,Rpl37a,Rpl36a,Rpl6,Rpl7,Rpl9,Rps12,Rps14,Rps15,Rps16,Rps17,Rps18,Rps19,Rps24,Rps29,Rps3a1,Rps4x,Rps5,Rps6,Rps7,Rps8,Rpl13a,Uba52,Ubb,Rpl27a,Rpl8,Rps3,Rps11,Rpl3,Rps26,Eif3g,Rps28,Eif3i,Rplp1,Eif3c,Rps27,Rpl35a,Rpl23,Eif3f,Eif1ax,Rps23,Rpl15,Rps21,Rpl36al,Rpl35,Rpl11,Rps10,Rpl14,Rplp2,Eif2s2,Rpl39,Rpl37,Rps…
1_Member	Reactome Gene Sets	R-MMU-72737	Cap-dependent Translation Initiation	-62.4784	-59.1653	Rplp0,Eif4a1,Eif4ebp1,Rpsa,Rps2,Rpl18,Rpl19,Rpl21,Rpl22,Rpl26,Rpl27,Rpl28,Rpl29,Rpl30,Rpl32,Rpl37a,Rpl36a,Rpl6,Rpl7,Rpl9,Rps12,Rps14,Rps15,Rps16,Rps17,Rps18,Rps19,Rps24,Rps29,Rps3a1,Rps4x,Rps5,Rps6,Rps7,Rps8,Rpl13a,Uba52,Ubb,Rpl27a,Rpl8,Rps3,Rps11,Rpl3,Rps26,Eif3g,Rps28,Eif3i,Rplp1,Eif3c,Rps27,Rpl35a,Rpl23,Eif3f,Eif1ax,Rps23,Rpl15,Rps21,Rpl36al,Rpl35,Rpl11,Rps10,Rpl14,Rplp2,Eif2s2,Rpl39,Rpl37,Rps…
1_Member	KEGG Pathway	mmu03010	Ribosome - Mus musculus (house mouse)	-60.8417	-57.5742	Rplp0,Fau,Rpsa,Rps2,Rpl10a,Rpl18,Rpl19,Rpl21,Rpl22,Mrpl23,Rpl26,Rpl27,Rpl28,Rpl29,Rpl30,Rpl32,Rpl37a,Rpl36a,Rpl6,Rpl7,Rpl9,Rps12,Rps14,Rps15,Rps16,Rps17,Rps18,Rps19,Rps24,Rps29,Rps3a1,Rps4x,Rps5,Rps6,Rps7,Rps8,Rpl13a,Uba52,Mrps12,Rpl27a,Rpl8,Rps3,Rpl7a,Rps11,Rpl3,Rps26,Mrpl17,Mrps7,Rps28,Rpl36,Rplp1,Mrpl12,Mrpl19,Rps27,Rpl35a,Mrps14,Rpl23,Mrpl4,Mrps17,Mrps21,Mrpl20,Rps23,Rpl15,Rps21,Rpl36al,Rpl35…
1_Member	GO Biological Processes	GO:0002181	cytoplasmic translation	-58.3129	-55.0869	Rplp0,Eif4a1,Eif4ebp1,Fau,Rpsa,Rps2,Rpl10a,Rpl18,Rpl19,Rpl21,Rpl22,Rpl26,Rpl27,Rpl28,Rpl29,Rpl30,Rpl32,Rpl37a,Rpl36a,Rpl6,Rpl7,Rpl9,Rps12,Rps14,Rps15,Rps16,Rps17,Rps18,Rps19,Rps24,Rps29,Rps3a1,Rps4x,Rps5,Rps6,Rps7,Rps8,Rpl13a,Uba52,Rpl27a,Rpl8,Rps3,Rpl7a,Rps11,Rpl3,Rps26,Rps28,Rpl36,Eif3i,Rplp1,Rpl35a,Rpl23,Rps23,Rpl15,Rps21,Rwdd1,Rpl11,Rps10,Rpl14,Rplp2,Eif2s2,Rpl39,Rps20,Rpl38,Rpl4,Rpl41,Rpl22l…
1_Member	Reactome Gene Sets	R-MMU-927802	Nonsense-Mediated Decay (NMD)	-53.7367	-50.5832	Rplp0,Rpsa,Rps2,Rpl18,Rpl19,Rpl21,Rpl22,Rpl26,Rpl27,Rpl28,Rpl29,Rpl30,Rpl32,Rpl37a,Rpl36a,Rpl6,Rpl7,Rpl9,Rps12,Rps14,Rps15,Rps16,Rps17,Rps18,Rps19,Rps24,Rps29,Rps3a1,Rps4x,Rps5,Rps6,Rps7,Rps8,Rpl13a,Uba52,Ubb,Rpl27a,Rpl8,Rps3,Rps11,Rpl3,Rps26,Pnrc2,Rps28,Rplp1,Rps27,Rpl35a,Rpl23,Rps23,Rpl15,Rps21,Rpl36al,Rpl35,Rpl11,Rps10,Rpl14,Rplp2,Rpl39,Rpl37,Rps20,Rpl38,Rpl4,Rps27l,Rpl22l1,Rps13,Rpl39l,Rpl24,…
1_Member	Reactome Gene Sets	R-MMU-975957	Nonsense Mediated Decay (NMD) enhanced by the Exon Junction Complex (EJC)	-53.7367	-50.5832	Rplp0,Rpsa,Rps2,Rpl18,Rpl19,Rpl21,Rpl22,Rpl26,Rpl27,Rpl28,Rpl29,Rpl30,Rpl32,Rpl37a,Rpl36a,Rpl6,Rpl7,Rpl9,Rps12,Rps14,Rps15,Rps16,Rps17,Rps18,Rps19,Rps24,Rps29,Rps3a1,Rps4x,Rps5,Rps6,Rps7,Rps8,Rpl13a,Uba52,Ubb,Rpl27a,Rpl8,Rps3,Rps11,Rpl3,Rps26,Pnrc2,Rps28,Rplp1,Rps27,Rpl35a,Rpl23,Rps23,Rpl15,Rps21,Rpl36al,Rpl35,Rpl11,Rps10,Rpl14,Rplp2,Rpl39,Rpl37,Rps20,Rpl38,Rpl4,Rps27l,Rpl22l1,Rps13,Rpl39l,Rpl24,…
1_Member	GO Biological Processes	GO:0140241	translation at synapse	-49.7846	-46.6933	Eef2,Rpl10a,Rpl22,Rpl26,Rpl27,Rpl28,Rpl29,Rpl32,Rpl37a,Rpl36a,Rpl6,Rpl7,Rpl9,Rps12,Rps14,Rps16,Rps24,Rps5,Rpl13a,Uba52,Rpl27a,Rpl8,Rpl7a,Rps11,Rps26,Rps28,Rpl36,Rps27,Rpl35a,Rpl23,Rpl15,Rpl35,Rps10,Rpl14,Rplp2,Rpl37,Rpl38,Rpl4,Rpl24,Rpl34,Rps27a,Rpl10,Rps15a,Rpl23a,Rpl12,Rpl13,Rpl17,Rpl5
1_Member	GO Biological Processes	GO:0140242	translation at postsynapse	-49.7846	-46.6933	Eef2,Rpl10a,Rpl22,Rpl26,Rpl27,Rpl28,Rpl29,Rpl32,Rpl37a,Rpl36a,Rpl6,Rpl7,Rpl9,Rps12,Rps14,Rps16,Rps24,Rps5,Rpl13a,Uba52,Rpl27a,Rpl8,Rpl7a,Rps11,Rps26,Rps28,Rpl36,Rps27,Rpl35a,Rpl23,Rpl15,Rpl35,Rps10,Rpl14,Rplp2,Rpl37,Rpl38,Rpl4,Rpl24,Rpl34,Rps27a,Rpl10,Rps15a,Rpl23a,Rpl12,Rpl13,Rpl17,Rpl5
1_Member	GO Biological Processes	GO:0140236	translation at presynapse	-48.7426	-45.6793	Rpl10a,Rpl22,Rpl26,Rpl27,Rpl28,Rpl29,Rpl32,Rpl37a,Rpl36a,Rpl6,Rpl7,Rpl9,Rps12,Rps14,Rps16,Rps24,Rps5,Rpl13a,Uba52,Rpl27a,Rpl8,Rpl7a,Rps11,Rps26,Rps28,Rpl36,Rps27,Rpl35a,Rpl23,Rpl15,Rpl35,Rps10,Rpl14,Rplp2,Rpl37,Rpl38,Rpl4,Rpl24,Rpl34,Rps27a,Rpl10,Rps15a,Rpl23a,Rpl12,Rpl13,Rpl17,Rpl5
1_Member	KEGG Pathway	mmu05171	Coronavirus disease - COVID-19 - Mus musculus (house mouse)	-47.6118	-44.5748	Ace,Agtr1a,Rplp0,C1qa,C1qb,C1qc,C3,C3ar1,C4b,C5ar1,Cybb,Fau,Fcgr3,Cfb,Hbegf,Ifnar2,Rpsa,Rps2,Myd88,Nfkbia,Pik3cd,Prkcb,Rpl10a,Rpl18,Rpl19,Rpl21,Rpl22,Rpl26,Rpl27,Rpl28,Rpl29,Rpl30,Rpl32,Rpl37a,Rpl36a,Rpl6,Rpl7,Rpl9,Rps12,Rps14,Rps15,Rps16,Rps17,Rps18,Rps19,Rps24,Rps29,Rps3a1,Rps4x,Rps5,Rps6,Rps7,Rps8,Ccl2,Syk,Tnfrsf1a,Rpl13a,Uba52,Rpl27a,Rpl8,Rps3,Rpl7a,Rps11,Rpl3,Rps26,C1s1,C1ra,Rps28,Rpl36,Rplp…
1_Member	GO Biological Processes	GO:0006412	translation	-46.1712	-43.159	Rplp0,Eef1a1,Eef2,Eif4a1,Eif4ebp1,Eif4g2,Fau,Mrps33,Rack1,Rpsa,Rps2,Rpl10a,Rpl18,Rpl19,Rpl21,Rpl22,Mrpl23,Rpl26,Rpl27,Rpl28,Rpl29,Rpl30,Rpl32,Rpl37a,Rpl36a,Rpl6,Rpl7,Rpl9,Rps12,Rps14,Rps15,Rps16,Rps17,Rps18,Rps19,Rps24,Rps29,Rps3a1,Rps4x,Rps5,Rps6,Rps7,Rps8,Eif1,Rpl13a,Uba52,Mrps12,Rpl27a,Rpl8,Rps3,Rpl7a,Rps11,Rpl3,Rps26,Mrpl17,Mrps7,Eif3g,Rps28,Rpl36,Eif3i,Eef1b2,Rplp1,Mrpl12,Mrpl19,Eif3c,Rps27,…
1_Member	GO Biological Processes	GO:0006518	peptide metabolic process	-43.5595	-40.5794	Ace,Aebp1,Rplp0,Tpp1,Cpe,Ctsh,Dpep1,Eef1a1,Eef2,Eif4a1,Eif4ebp1,Eif4g2,Fau,Mrps33,Rack1,Rpsa,Rps2,P4hb,Rpl10a,Rpl18,Rpl19,Rpl21,Rpl22,Mrpl23,Rpl26,Rpl27,Rpl28,Rpl29,Rpl30,Rpl32,Rpl37a,Rpl36a,Rpl6,Rpl7,Rpl9,Rps12,Rps14,Rps15,Rps16,Rps17,Rps18,Rps19,Rps24,Rps29,Rps3a1,Rps4x,Rps5,Rps6,Rps7,Rps8,Eif1,Tapbp,Hsp90b1,Rpl13a,Uba52,Ggt5,Mrps12,Rpl27a,Rpl8,Rps3,Rpl7a,Rps11,Rpl3,Rps26,Mrpl17,Abca7,Mrps7,Eif…
1_Member	GO Biological Processes	GO:0043043	peptide biosynthetic process	-43.5458	-40.5794	Rplp0,Eef1a1,Eef2,Eif4a1,Eif4ebp1,Eif4g2,Fau,Mrps33,Rack1,Rpsa,Rps2,Rpl10a,Rpl18,Rpl19,Rpl21,Rpl22,Mrpl23,Rpl26,Rpl27,Rpl28,Rpl29,Rpl30,Rpl32,Rpl37a,Rpl36a,Rpl6,Rpl7,Rpl9,Rps12,Rps14,Rps15,Rps16,Rps17,Rps18,Rps19,Rps24,Rps29,Rps3a1,Rps4x,Rps5,Rps6,Rps7,Rps8,Eif1,Rpl13a,Uba52,Ggt5,Mrps12,Rpl27a,Rpl8,Rps3,Rpl7a,Rps11,Rpl3,Rps26,Mrpl17,Mrps7,Eif3g,Rps28,Rpl36,Eif3i,Eef1b2,Rplp1,Mrpl12,Mrpl19,Eif3c,R…
1_Member	GO Biological Processes	GO:0043604	amide biosynthetic process	-38.0949	-35.1892	Rplp0,Cebpa,Degs1,Eef1a1,Eef2,Eif4a1,Eif4ebp1,Eif4g2,Fau,Mrps33,Rack1,Rpsa,Rps2,Rpl10a,Rpl18,Rpl19,Rpl21,Rpl22,Mrpl23,Rpl26,Rpl27,Rpl28,Rpl29,Rpl30,Rpl32,Rpl37a,Rpl36a,Rpl6,Rpl7,Rpl9,Rps12,Rps14,Rps15,Rps16,Rps17,Rps18,Rps19,Rps24,Rps29,Rps3a1,Rps4x,Rps5,Rps6,Rps7,Rps8,St6galnac3,St8sia4,Smpd1,Eif1,Rpl13a,Uba52,Ggt5,Mrps12,Rpl27a,Rpl8,Rps3,Rpl7a,Rps11,Rpl3,Rps26,Mrpl17,Mrps7,St6galnac6,Eif3g,Rps2…
1_Member	Reactome Gene Sets	R-MMU-6791226	Major pathway of rRNA processing in the nucleolus and cytosol	-37.9955	-35.1431	Rplp0,Rpsa,Rps2,Rpl18,Rpl19,Rpl21,Rpl22,Rpl26,Rpl27,Rpl28,Rpl29,Rpl30,Rpl32,Rpl37a,Rpl36a,Rpl6,Rpl7,Rpl9,Rps12,Rps14,Rps15,Rps16,Rps17,Rps18,Rps19,Rps24,Rps29,Rps3a1,Rps4x,Rps5,Rps6,Rps7,Rps8,Snu13,Rpl13a,Uba52,Ubb,Rpl27a,Rpl8,Rps3,Rps11,Rpl3,Rps26,Rps28,Rplp1,Ftsj3,Rps27,C1d,Rpl35a,Rpl23,Rps23,Rpl15,Rps21,Rpl36al,Rpl35,Rpl11,Rps10,Rpl14,Rplp2,Rpl39,Rpl37,Rps20,Rpl38,Rpl4,Rps27l,Rpl22l1,Rps13,Rpl…
1_Member	Reactome Gene Sets	R-MMU-72312	rRNA processing	-37.9955	-35.1431	Rplp0,Rpsa,Rps2,Rpl18,Rpl19,Rpl21,Rpl22,Rpl26,Rpl27,Rpl28,Rpl29,Rpl30,Rpl32,Rpl37a,Rpl36a,Rpl6,Rpl7,Rpl9,Rps12,Rps14,Rps15,Rps16,Rps17,Rps18,Rps19,Rps24,Rps29,Rps3a1,Rps4x,Rps5,Rps6,Rps7,Rps8,Snu13,Rpl13a,Uba52,Ubb,Rpl27a,Rpl8,Rps3,Rps11,Rpl3,Rps26,Rps28,Rplp1,Ftsj3,Rps27,C1d,Rpl35a,Rpl23,Rps23,Rpl15,Rps21,Rpl36al,Rpl35,Rpl11,Rps10,Rpl14,Rplp2,Rpl39,Rpl37,Rps20,Rpl38,Rpl4,Rps27l,Rpl22l1,Rps13,Rpl…
1_Member	Reactome Gene Sets	R-MMU-8868773	rRNA processing in the nucleus and cytosol	-37.9955	-35.1431	Rplp0,Rpsa,Rps2,Rpl18,Rpl19,Rpl21,Rpl22,Rpl26,Rpl27,Rpl28,Rpl29,Rpl30,Rpl32,Rpl37a,Rpl36a,Rpl6,Rpl7,Rpl9,Rps12,Rps14,Rps15,Rps16,Rps17,Rps18,Rps19,Rps24,Rps29,Rps3a1,Rps4x,Rps5,Rps6,Rps7,Rps8,Snu13,Rpl13a,Uba52,Ubb,Rpl27a,Rpl8,Rps3,Rps11,Rpl3,Rps26,Rps28,Rplp1,Ftsj3,Rps27,C1d,Rpl35a,Rpl23,Rps23,Rpl15,Rps21,Rpl36al,Rpl35,Rpl11,Rps10,Rpl14,Rplp2,Rpl39,Rpl37,Rps20,Rpl38,Rpl4,Rps27l,Rpl22l1,Rps13,Rpl…
1_Member	GO Biological Processes	GO:0043603	amide metabolic process	-35.4192	-32.6289	Ace,Aebp1,Rplp0,Cebpa,Tpp1,Cpe,Ctsh,Degs1,Dpep1,Eef1a1,Eef2,Eif4a1,Eif4ebp1,Eif4g2,Fasn,Fau,Mrps33,Gm2a,Rack1,Hexb,Rpsa,Rps2,Nnmt,Oat,P4hb,Pnp,Psap,Rpl10a,Rpl18,Rpl19,Rpl21,Rpl22,Mrpl23,Rpl26,Rpl27,Rpl28,Rpl29,Rpl30,Rpl32,Rpl37a,Rpl36a,Rpl6,Rpl7,Rpl9,Rps12,Rps14,Rps15,Rps16,Rps17,Rps18,Rps19,Rps24,Rps29,Rps3a1,Rps4x,Rps5,Rps6,Rps7,Rps8,St6galnac3,St8sia4,Smpd1,Eif1,Tapbp,Hsp90b1,Rpl13a,Uba52,Ggt5…
1_Member	Reactome Gene Sets	R-MMU-72695	Formation of the ternary complex, and subsequently, the 43S complex	-29.1364	-26.4488	Rpsa,Rps2,Rps12,Rps14,Rps15,Rps16,Rps17,Rps18,Rps19,Rps24,Rps29,Rps3a1,Rps4x,Rps5,Rps6,Rps7,Rps8,Uba52,Rps3,Rps11,Rps26,Eif3g,Rps28,Eif3i,Eif3c,Rps27,Eif3f,Eif1ax,Rps23,Rps21,Rps10,Eif2s2,Rps20,Rps27l,Rps13,Eif3k,Rps25,Rps9,Rps15a
1_Member	Reactome Gene Sets	R-MMU-72662	Activation of the mRNA upon binding of the cap-binding complex and eIFs, and subsequent binding to 43S	-27.9521	-25.283	Eif4a1,Eif4ebp1,Rpsa,Rps2,Rps12,Rps14,Rps15,Rps16,Rps17,Rps18,Rps19,Rps24,Rps29,Rps3a1,Rps4x,Rps5,Rps6,Rps7,Rps8,Uba52,Rps3,Rps11,Rps26,Eif3g,Rps28,Eif3i,Eif3c,Rps27,Eif3f,Eif1ax,Rps23,Rps21,Rps10,Eif2s2,Rps20,Rps27l,Rps13,Eif3k,Rps25,Rps9,Rps15a
1_Member	Reactome Gene Sets	R-MMU-72649	Translation initiation complex formation	-27.0768	-24.4429	Eif4a1,Rpsa,Rps2,Rps12,Rps14,Rps15,Rps16,Rps17,Rps18,Rps19,Rps24,Rps29,Rps3a1,Rps4x,Rps5,Rps6,Rps7,Rps8,Uba52,Rps3,Rps11,Rps26,Eif3g,Rps28,Eif3i,Eif3c,Rps27,Eif3f,Eif1ax,Rps23,Rps21,Rps10,Eif2s2,Rps20,Rps27l,Rps13,Eif3k,Rps25,Rps9,Rps15a
1_Member	Reactome Gene Sets	R-MMU-72702	Ribosomal scanning and start codon recognition	-27.0768	-24.4429	Eif4a1,Rpsa,Rps2,Rps12,Rps14,Rps15,Rps16,Rps17,Rps18,Rps19,Rps24,Rps29,Rps3a1,Rps4x,Rps5,Rps6,Rps7,Rps8,Uba52,Rps3,Rps11,Rps26,Eif3g,Rps28,Eif3i,Eif3c,Rps27,Eif3f,Eif1ax,Rps23,Rps21,Rps10,Eif2s2,Rps20,Rps27l,Rps13,Eif3k,Rps25,Rps9,Rps15a
1_Member	Reactome Gene Sets	R-MMU-8953854	Metabolism of RNA	-21.9623	-19.4657	Apobec1,Rplp0,Zfp36l1,Eif4a1,Hspa8,Hspb1,Rpsa,Rps2,Psmb8,Polr2k,Psma2,Psmb10,Psmb4,Psmb5,Psmb6,Psmc2,Psmc3,Psme2,Rpl18,Rpl19,Rpl21,Rpl22,Rpl26,Rpl27,Rpl28,Rpl29,Rpl30,Rpl32,Rpl37a,Rpl36a,Rpl6,Rpl7,Rpl9,Rps12,Rps14,Rps15,Rps16,Rps17,Rps18,Rps19,Rps24,Rps29,Rps3a1,Rps4x,Rps5,Rps6,Rps7,Rps8,Sap18,Snrpe,Snu13,Alyref,Rpl13a,Uba52,Ubb,Ubc,Ybx1,Pcbp1,Psma5,Psma7,Psmb3,Rpl27a,Rpl8,Rps3,Rps11,Txnl4a,Rpl3,…
1_Member	GO Biological Processes	GO:0042274	ribosomal small subunit biogenesis	-8.58571	-6.76391	Fau,Rpsa,Npm1,Rps12,Rps14,Rps15,Rps16,Rps17,Rps19,Rps24,Rps3a1,Rps5,Rps6,Rps7,Rps8,Snu13,Rps11,Mrps7,Rps28,Rps27,Rps23,Rps21,Rpl38,Rps27l,Rps13,Nol7,Rps25,Rps9,Imp3,Pwp2,Rps15a
2_Summary	KEGG Pathway	mmu00190	Oxidative phosphorylation - Mus musculus (house mouse)	-39.1167	-36.1715	Atp5a1,Atp5b,Atp5g1,Atp5j,Atp5k,Atp6v1e1,Atp6v0e,Atp6v0c,Cox17,Cox4i1,Cox5a,Cox5b,Cox6a1,Cox6c,Cox7a1,Cox7a2,Cox7c,Cox8a,Cox8b,Cycs,Ndufa2,Ndufa4,Cox7a2l,Uqcrq,Atp5l,Atp5o,Ndufa1,Atp5j2,Atp5d,Ndufb5,Ndufa3,Cox7b,Atp6v1f,Uqcr10,Ndufb9,Atp6v1g1,Ndufc1,Ndufa12,Ndufa7,Cyc1,Ndufb3,Uqcrh,Uqcr11,Ndufb7,Atp5e,Ndufa6,Ndufa13,Ndufb8,Ndufa10,Uqcrb,Atp5g2,Ndufb4,Ndufc2,Ndufb2,Ndufa5,Ndufb10,Ndufa8,Ndufa11,Nd…
2_Member	KEGG Pathway	mmu00190	Oxidative phosphorylation - Mus musculus (house mouse)	-39.1167	-36.1715	Atp5a1,Atp5b,Atp5g1,Atp5j,Atp5k,Atp6v1e1,Atp6v0e,Atp6v0c,Cox17,Cox4i1,Cox5a,Cox5b,Cox6a1,Cox6c,Cox7a1,Cox7a2,Cox7c,Cox8a,Cox8b,Cycs,Ndufa2,Ndufa4,Cox7a2l,Uqcrq,Atp5l,Atp5o,Ndufa1,Atp5j2,Atp5d,Ndufb5,Ndufa3,Cox7b,Atp6v1f,Uqcr10,Ndufb9,Atp6v1g1,Ndufc1,Ndufa12,Ndufa7,Cyc1,Ndufb3,Uqcrh,Uqcr11,Ndufb7,Atp5e,Ndufa6,Ndufa13,Ndufb8,Ndufa10,Uqcrb,Atp5g2,Ndufb4,Ndufc2,Ndufb2,Ndufa5,Ndufb10,Ndufa8,Ndufa11,Nd…
2_Member	KEGG Pathway	mmu05012	Parkinson disease - Mus musculus (house mouse)	-37.6427	-34.8067	Slc25a4,Slc25a5,Atp5a1,Atp5b,Atp5g1,Atp5j,Bax,Calm1,Calm3,Cox4i1,Cox5a,Cox5b,Cox6a1,Cox6c,Cox7a1,Cox7a2,Cox7c,Cox8a,Cox8b,Cycs,Gnai2,Gnas,Hspa5,Ndufa2,Ndufa4,Psma2,Psmb4,Psmb5,Psmb6,Psmc2,Psmc3,Dusp1,Sem1,Cox7a2l,Tuba1a,Tuba1b,Tuba1c,Tubb2a,Tubb5,Txn1,Uba52,Ubb,Ubc,Uba1,Uqcrq,Psma5,Psma7,Psmb3,Atp5o,Slc39a1,Ndufa1,Psmd8,Park7,Atp5d,Ndufb5,Ndufa3,Cox7b,Uqcr10,Ndufb9,Ndufc1,Ndufa12,Ndufa7,Cyc1,Nduf…
2_Member	KEGG Pathway	mmu05020	Prion disease - Mus musculus (house mouse)	-36.9647	-34.1445	Slc25a4,Slc25a5,Atp5a1,Atp5b,Atp5g1,Atp5j,Bad,Bax,C1qa,C1qb,C1qc,Cav2,Cox4i1,Cox5a,Cox5b,Cox6a1,Cox6c,Cox7a1,Cox7a2,Cox7c,Cox8a,Cox8b,Creb3,Cyba,Cybb,Cycs,Egr1,Fyn,Hspa5,Hspa8,Ncf1,Ncf2,Ndufa2,Ndufa4,Pik3cd,Prnp,Psma2,Psmb4,Psmb5,Psmb6,Psmc2,Psmc3,Rac2,Ccl5,Sem1,Cox7a2l,Tuba1a,Tuba1b,Tuba1c,Tubb2a,Tubb5,Uqcrq,Creb3l1,Psma5,Psma7,Psmb3,Atp5o,Ndufa1,Psmd8,Atp5d,Ndufb5,Ndufa3,Cox7b,Uqcr10,Ndufb9,Ndu…
2_Member	KEGG Pathway	mmu05415	Diabetic cardiomyopathy - Mus musculus (house mouse)	-36.44	-33.6349	Ace,Agt,Agtr1a,Slc25a4,Slc25a5,Atp5a1,Atp5b,Atp5g1,Atp5j,Cd36,Col3a1,Col1a1,Col1a2,Cox4i1,Cox5a,Cox5b,Cox6a1,Cox6c,Cox7a1,Cox7a2,Cox7c,Cox8a,Cox8b,Ctsd,Cyba,Cybb,Gapdh,Gfpt2,Mmp2,Ncf1,Ncf2,Ndufa2,Ndufa4,Nos3,Pik3cd,Prkcb,Ppp1ca,Rac2,Cox7a2l,Tgfb1,Tgfb2,Uqcrq,Akt3,Pdk4,Atp5o,Ndufa1,Atp5d,Ndufb5,Ndufa3,Cox7b,Uqcr10,Ndufb9,Ndufc1,Ndufa12,Ndufa7,Cyc1,Ndufb3,Uqcrh,Uqcr11,Ndufb7,Atp5e,Ndufa6,Ndufa13,Nd…
2_Member	GO Biological Processes	GO:0006119	oxidative phosphorylation	-34.2759	-31.4998	Atp5a1,Atp5b,Atp5j,Atp5k,Coq7,Cox4i1,Cox5a,Cox5b,Cox6a1,Cox6c,Cox7a1,Cox7a2,Cox7c,Cox8a,Cox8b,Cycs,Ndufa2,Cox7a2l,Uqcrq,Atp5o,Ndufa1,Atp5j2,Atp5d,Ndufb5,Ndufa3,Cox7b,Uqcr10,Ndufb9,Ndufc1,Ndufa12,Ndufa7,Cyc1,Ndufb3,Uqcrh,Uqcr11,Ndufb7,Atp5e,Ndufa6,Ndufa13,Ndufb8,Ndufa10,Uqcrb,Coa6,Ndufb4,Ndufc2,Ndufb2,Ndufa5,Ndufb10,Ndufa8,Ndufa11,Ndufab1,Atp5h,Ndufv3,Cox4i2,Chchd10,Ndufb11,Uqcc3,Ndufs8,Ndufs2,Ndu…
2_Member	KEGG Pathway	mmu05016	Huntington disease - Mus musculus (house mouse)	-32.5095	-29.7473	Slc25a4,Slc25a5,Ap2m1,Atp5a1,Atp5b,Atp5g1,Atp5j,Bax,Clta,Cox4i1,Cox5a,Cox5b,Cox6a1,Cox6c,Cox7a1,Cox7a2,Cox7c,Cox8a,Cox8b,Creb3,Cycs,Gpx1,Gpx3,Polr2k,Ndufa2,Ndufa4,Psma2,Psmb4,Psmb5,Psmb6,Psmc2,Psmc3,Polr2j,Sem1,Cox7a2l,Sod2,Tgm2,Tuba1a,Tuba1b,Tuba1c,Tubb2a,Tubb5,Uqcrq,Creb3l1,Psma5,Psma7,Psmb3,Atp5o,Dctn3,Gria3,Ndufa1,Psmd8,Atp5d,Ndufb5,Ndufa3,Cox7b,Uqcr10,Ndufb9,Ndufc1,Ndufa12,Ndufa7,Polr2e,Cyc1…
2_Member	WikiPathways	WP295	Electron transport chain	-32.3789	-29.63	Slc25a4,Slc25a5,Atp5a1,Atp5b,Atp5j,Atpif1,Cox17,Cox4i1,Cox5a,Cox5b,Cox6a1,Cox6c,Cox7a1,Cox7a2,Cox8a,Ndufa2,Cox7a2l,Ucp2,Uqcrq,Atp5l,Atp5o,Ndufa1,Atp5j2,Atp5d,Ndufb5,Cox7b,Uqcr10,Ndufb9,Ndufc1,Ndufa12,Ndufa7,Ndufb3,Uqcrh,Uqcr11,Ndufb7,Atp5e,Ndufa6,Ndufa10,Uqcrb,Atp5g2,Ndufb4,Ndufc2,Ndufb2,Ndufa5,Ndufb10,Ndufa8,Ndufab1,Atp5h,Ndufv3,Ndufs8,Ndufs2,Atp5g3,Ndufb6,Ndufs6,Ndufs5
2_Member	Reactome Gene Sets	R-MMU-163200	Respiratory electron transport, ATP synthesis by chemiosmotic coupling, and heat production by uncoupling proteins.	-31.2935	-28.5575	Atp5a1,Atp5b,Atp5g1,Atp5j,Atp5k,Cox4i1,Cox5a,Cox6a1,Cox7c,Cox8a,Cycs,Ndufa2,Ndufa4,Cox7a2l,Ucp2,Uqcrq,Atp5l,Atp5o,Ndufa1,Atp5j2,Atp5d,Ndufb5,Ndufa3,Cox7b,Uqcr10,Ndufb9,Cox20,Ndufc1,Cox14,Ndufa12,Ndufa7,Cyc1,Ndufb3,Uqcrh,Uqcr11,Ndufaf3,Ndufb7,Atp5e,Ndufa6,Ndufa13,Ndufb8,Ndufa10,Ndufb4,Ndufc2,Ndufb2,Ndufa5,Ndufb10,Ndufa8,Ndufab1,Atp5h,Ndufv3,Ndufb11,Cox6b1,Etfb,Ndufs8,Ndufs2,Atp5g3,Ndufb6,Ndufs6,Nd…
2_Member	GO Biological Processes	GO:0045333	cellular respiration	-30.1646	-27.4412	Atp5a1,Atp5b,Atp5j,Atp5k,Bax,Coq7,Cox4i1,Cox5a,Cox5b,Cox6a1,Cox6c,Cox7a1,Cox7a2,Cox7c,Cox8a,Cox8b,Cycs,Bloc1s1,Gpd1,Idh3g,Mdh2,Mdh1,Ndufa2,Plec,Cox7a2l,Sod2,Uqcrq,Atp5o,Ndufa1,Suclg1,Slc37a2,Atp5j2,Atp5d,Ndufb5,Ndufa3,Cox7b,Uqcr10,Ndufb9,Ndufc1,Ndufa12,Ndufa7,Cyc1,Ndufb3,Uqcrh,Uqcr11,Ndufb7,Atp5e,Ndufa6,Ndufa13,Ndufb8,Ndufa10,Uqcrb,Mtln,Coa6,Ndufb4,Ndufc2,Ndufb2,Ndufa5,Ndufb10,Ndufa8,Ndufa11,Nduf…
2_Member	GO Biological Processes	GO:0009060	aerobic respiration	-29.9057	-27.1946	Atp5a1,Atp5b,Atp5j,Atp5k,Coq7,Cox4i1,Cox5a,Cox5b,Cox6a1,Cox6c,Cox7a1,Cox7a2,Cox7c,Cox8a,Cox8b,Cycs,Bloc1s1,Idh3g,Mdh2,Mdh1,Ndufa2,Cox7a2l,Uqcrq,Atp5o,Ndufa1,Suclg1,Atp5j2,Atp5d,Ndufb5,Ndufa3,Cox7b,Uqcr10,Ndufb9,Ndufc1,Ndufa12,Ndufa7,Cyc1,Ndufb3,Uqcrh,Uqcr11,Ndufb7,Atp5e,Ndufa6,Ndufa13,Ndufb8,Ndufa10,Uqcrb,Coa6,Ndufb4,Ndufc2,Ndufb2,Ndufa5,Ndufb10,Ndufa8,Ndufa11,Ndufab1,Atp5h,Ndufv3,Cox4i2,Chchd10,…
2_Member	KEGG Pathway	mmu04714	Thermogenesis - Mus musculus (house mouse)	-29.6142	-26.915	Actb,Actg1,Adcy7,Atp5a1,Atp5b,Atp5g1,Atp5j,Atp5k,Cox17,Cox4i1,Cox5a,Cox5b,Cox6a1,Cox6c,Cox7a1,Cox7a2,Cox7c,Cox8a,Cox8b,Creb3,Gnas,Hras,Ndufa2,Ndufa4,Npr1,Prkg1,Rps6,Cox7a2l,Tsc2,Uqcrq,Creb3l1,Atp5l,Atp5o,Coa3,Ndufa1,Atp5j2,Atp5d,Ndufb5,Ndufa3,Cox7b,Uqcr10,Ndufb9,Cox20,Ndufc1,Cox14,Ndufa12,Ndufa7,Cyc1,Ndufb3,Uqcrh,Uqcr11,Ndufaf3,Pnpla2,Ndufb7,Atp5e,Ndufa6,Ndufa13,Ndufb8,Ndufa10,Uqcrb,Akt1s1,Coa6,A…
2_Member	KEGG Pathway	mmu05208	Chemical carcinogenesis - reactive oxygen species - Mus musculus (house mouse)	-27.9483	-25.283	Slc25a4,Slc25a5,Atp5a1,Atp5b,Atp5g1,Atp5j,Bad,Cox4i1,Cox5a,Cox5b,Cox6a1,Cox6c,Cox7a1,Cox7a2,Cox7c,Cox8a,Cox8b,Cyba,Cyp1b1,Gstm1,Gstm2,Gstm5,Hmox1,Hras,Ncf1,Ncf2,Ndufa2,Ndufa4,Nfkbia,Pik3cd,Cox7a2l,Sod2,Uqcrq,Akt3,Atp5o,Nox4,Ndufa1,Mgst1,As3mt,Akr1a1,Atp5d,Ndufb5,Ndufa3,Cox7b,Uqcr10,Ndufb9,Ndufc1,Ndufa12,Ndufa7,Cyc1,Ndufb3,Uqcrh,Uqcr11,Ndufb7,Atp5e,Ndufa6,Ndufa13,Ndufb8,Ndufa10,Uqcrb,Atp5g2,Ndufb4…
2_Member	GO Biological Processes	GO:0015986	proton motive force-driven ATP synthesis	-27.5587	-24.9041	Atp5a1,Atp5b,Atp5g1,Atp5j,Atp5k,Ndufa2,Atp5l,Atp5o,Ndufa1,Atp5j2,Atp5d,Ndufb5,Ndufa3,Ndufb9,Ndufc1,Ndufa12,Ndufa7,Ndufb3,Ndufb7,Atp5e,Ndufa6,Ndufa13,Ndufb8,Ndufa10,Atp5g2,Ndufb4,Ndufc2,Ndufb2,Ndufa5,Ndufb10,Ndufa8,Ndufa11,Ndufab1,Atp5h,Ndufv3,Ndufb11,Ndufs8,Ndufs2,Atp5g3,Ndufb6,Ndufs6,Ndufs5,Ndufb1
2_Member	GO Biological Processes	GO:0006754	ATP biosynthetic process	-26.9075	-24.2836	Aldoa,Atp5a1,Atp5b,Atp5g1,Atp5j,Atp5k,Ndufa2,Tgfb1,Atp5l,Atp5o,Ndufa1,Ak3,Atp5j2,Atp5d,Ndufb5,Ndufa3,Ndufb9,Ndufc1,Ndufa12,Ndufa7,Ndufb3,Ndufb7,Atp5e,Ndufa6,Ndufa13,Ndufb8,Ndufa10,Atp5g2,Ndufb4,Ndufc2,Ndufb2,Ndufa5,Ndufb10,Ndufa8,Ndufa11,Ndufab1,Atp5h,Ndufv3,Ndufb11,Uqcc3,Ndufs8,Ndufs2,Atp5g3,Ndufb6,Ndufs6,Ndufs5,Ndufb1
2_Member	GO Biological Processes	GO:0009206	purine ribonucleoside triphosphate biosynthetic process	-26.8086	-24.1944	Aldoa,Atp5a1,Atp5b,Atp5g1,Atp5j,Atp5k,Ndufa2,Nme1,Nme2,Pnp,Tgfb1,Atp5l,Atp5o,Ndufa1,Ak3,Atp5j2,Atp5d,Ndufb5,Ndufa3,Ndufb9,Ndufc1,Ndufa12,Ndufa7,Ndufb3,Ndufb7,Atp5e,Ndufa6,Ndufa13,Ndufb8,Ndufa10,Atp5g2,Ndufb4,Ndufc2,Ndufb2,Ndufa5,Ndufb10,Ndufa8,Ndufa11,Ndufab1,Atp5h,Ndufv3,Ndufb11,Uqcc3,Ndufs8,Ndufs2,Atp5g3,Ndufb6,Ndufs6,Ndufs5,Ndufb1
2_Member	GO Biological Processes	GO:0009145	purine nucleoside triphosphate biosynthetic process	-26.5194	-23.9147	Aldoa,Atp5a1,Atp5b,Atp5g1,Atp5j,Atp5k,Ndufa2,Nme1,Nme2,Pnp,Tgfb1,Atp5l,Atp5o,Ndufa1,Ak3,Atp5j2,Atp5d,Ndufb5,Ndufa3,Ndufb9,Ndufc1,Ndufa12,Ndufa7,Ndufb3,Ndufb7,Atp5e,Ndufa6,Ndufa13,Ndufb8,Ndufa10,Atp5g2,Ndufb4,Ndufc2,Ndufb2,Ndufa5,Ndufb10,Ndufa8,Ndufa11,Ndufab1,Atp5h,Ndufv3,Ndufb11,Uqcc3,Ndufs8,Ndufs2,Atp5g3,Ndufb6,Ndufs6,Ndufs5,Ndufb1
2_Member	GO Biological Processes	GO:0009201	ribonucleoside triphosphate biosynthetic process	-26.4408	-23.8455	Aldoa,Atp5a1,Atp5b,Atp5g1,Atp5j,Atp5k,Ndufa2,Nme1,Nme2,Pnp,Tgfb1,Atp5l,Atp5o,Ctps,Ndufa1,Ak3,Atp5j2,Atp5d,Ndufb5,Ndufa3,Ndufb9,Ndufc1,Ndufa12,Ndufa7,Ndufb3,Ndufb7,Atp5e,Ndufa6,Ndufa13,Ndufb8,Ndufa10,Atp5g2,Ndufb4,Ndufc2,Ndufb2,Ndufa5,Ndufb10,Ndufa8,Ndufa11,Ndufab1,Atp5h,Ndufv3,Ndufb11,Uqcc3,Ndufs8,Ndufs2,Atp5g3,Ndufb6,Ndufs6,Ndufs5,Ndufb1
2_Member	Reactome Gene Sets	R-MMU-1428517	The citric acid (TCA) cycle and respiratory electron transport	-25.5422	-22.956	Atp5a1,Atp5b,Atp5g1,Atp5j,Atp5k,Cox4i1,Cox5a,Cox6a1,Cox7c,Cox8a,Cycs,Idh3g,Ldha,Mdh2,Ndufa2,Ndufa4,Cox7a2l,Ucp2,Uqcrq,Pdk4,Atp5l,Atp5o,Ndufa1,Suclg1,Atp5j2,Atp5d,Ndufb5,Ndufa3,Cox7b,Uqcr10,Ndufb9,Cox20,Ndufc1,Cox14,Ndufa12,Ndufa7,Cyc1,Ndufb3,Uqcrh,Uqcr11,Ndufaf3,Ndufb7,Atp5e,Ndufa6,Ndufa13,Ndufb8,Ndufa10,Ndufb4,Ndufc2,Ndufb2,Ndufa5,Ndufb10,Ndufa8,Ndufab1,Atp5h,Ndufv3,Ndufb11,Cox6b1,Etfb,Ndufs8,Nd…
2_Member	GO Biological Processes	GO:0015980	energy derivation by oxidation of organic compounds	-25.4328	-22.8556	Atp5a1,Atp5b,Atp5j,Atp5k,Bax,Coq7,Cox4i1,Cox5a,Cox5b,Cox6a1,Cox6c,Cox7a1,Cox7a2,Cox7c,Cox8a,Cox8b,Cycs,Bloc1s1,Gpd1,Gnas,Idh3g,Ldha,Lep,Mdh2,Mdh1,Ndufa2,Plec,Ppp1ca,S100b,Cox7a2l,Sod2,Uqcrq,Atp5o,Ndufa1,Suclg1,Slc37a2,Atp5j2,Gabarapl1,Atp5d,Ndufb5,Ndufa3,Cox7b,Uqcr10,Ndufb9,Ndufc1,Ndufa12,Ndufa7,Cyc1,Ndufb3,Uqcrh,Uqcr11,Ndufb7,Atp5e,Ndufa6,Ndufa13,Ndufb8,Ndufa10,Uqcrb,Mtln,Coa6,Ndufb4,Ndufc2,Nduf…
2_Member	GO Biological Processes	GO:0009142	nucleoside triphosphate biosynthetic process	-24.8549	-22.2864	Ak1,Aldoa,Atp5a1,Atp5b,Atp5g1,Atp5j,Atp5k,Ndufa2,Nme1,Nme2,Pnp,Tgfb1,Atp5l,Atp5o,Ctps,Ndufa1,Ak3,Atp5j2,Atp5d,Ndufb5,Ndufa3,Ndufb9,Ndufc1,Ndufa12,Ndufa7,Ndufb3,Ndufb7,Atp5e,Ndufa6,Ndufa13,Ndufb8,Ndufa10,Atp5g2,Ndufb4,Ndufc2,Ndufb2,Ndufa5,Ndufb10,Ndufa8,Ndufa11,Ndufab1,Atp5h,Ndufv3,Ndufb11,Uqcc3,Ndufs8,Ndufs2,Atp5g3,Ndufb6,Ndufs6,Ndufs5,Ndufb1
2_Member	KEGG Pathway	mmu04932	Non-alcoholic fatty liver disease - Mus musculus (house mouse)	-24.6812	-22.1213	Adipoq,Bax,Cdc42,Cebpa,Socs3,Cox4i1,Cox5a,Cox5b,Cox6a1,Cox6c,Cox7a1,Cox7a2,Cox7c,Cox8a,Cox8b,Cycs,Lep,Ndufa2,Ndufa4,Pik3cd,Cox7a2l,Tgfb1,Tnfrsf1a,Uqcrq,Akt3,Map3k11,Ndufa1,Ndufb5,Ndufa3,Cox7b,Uqcr10,Ndufb9,Ndufc1,Ndufa12,Ndufa7,Cyc1,Ndufb3,Uqcrh,Uqcr11,Ndufb7,Ndufa6,Ndufa13,Ndufb8,Ndufa10,Uqcrb,Ndufb4,Ndufc2,Ndufb2,Ndufa5,Ndufb10,Ndufa8,Ndufa11,Ndufab1,Ndufv3,Cox4i2,Ndufb11,Cox6b1,Ndufs8,Ndufs2,N…
2_Member	GO Biological Processes	GO:0042776	proton motive force-driven mitochondrial ATP synthesis	-24.5674	-22.016	Atp5a1,Atp5b,Atp5j,Atp5k,Ndufa2,Atp5o,Ndufa1,Atp5j2,Atp5d,Ndufb5,Ndufa3,Ndufb9,Ndufc1,Ndufa12,Ndufa7,Ndufb3,Ndufb7,Atp5e,Ndufa6,Ndufa13,Ndufb8,Ndufa10,Ndufb4,Ndufc2,Ndufb2,Ndufa5,Ndufb10,Ndufa8,Ndufa11,Ndufab1,Atp5h,Ndufv3,Ndufb11,Ndufs8,Ndufs2,Ndufb6,Ndufs6,Ndufs5,Ndufb1
2_Member	KEGG Pathway	mmu05010	Alzheimer disease - Mus musculus (house mouse)	-24.2759	-21.7328	Slc25a4,Slc25a5,Apoe,Atp5a1,Atp5b,Atp5g1,Atp5j,Bad,Calm1,Calm3,Ctnnb1,Cox4i1,Cox5a,Cox5b,Cox6a1,Cox6c,Cox7a1,Cox7a2,Cox7c,Cox8a,Cox8b,Csf1,Cybb,Cycs,Fzd1,Gapdh,Hsd17b10,Hras,Lpl,Ndufa2,Ndufa4,Pik3cd,Psma2,Psmb4,Psmb5,Psmb6,Psmc2,Psmc3,Sem1,Cox7a2l,Tnfrsf1a,Tuba1a,Tuba1b,Tuba1c,Tubb2a,Tubb5,Uqcrq,Akt3,Psma5,Psma7,Psmb3,Atp5o,Slc39a1,Nox4,Ndufa1,Psmd8,Atp5d,Ndufb5,Ndufa3,Cox7b,Uqcr10,Ndufb9,Psenen,…
2_Member	Reactome Gene Sets	R-MMU-611105	Respiratory electron transport	-24.1773	-21.6423	Cox4i1,Cox5a,Cox6a1,Cox7c,Cox8a,Cycs,Ndufa2,Ndufa4,Cox7a2l,Uqcrq,Ndufa1,Ndufb5,Ndufa3,Cox7b,Uqcr10,Ndufb9,Cox20,Ndufc1,Cox14,Ndufa12,Ndufa7,Cyc1,Ndufb3,Uqcrh,Uqcr11,Ndufaf3,Ndufb7,Ndufa6,Ndufa13,Ndufb8,Ndufa10,Ndufb4,Ndufc2,Ndufb2,Ndufa5,Ndufb10,Ndufa8,Ndufab1,Ndufv3,Ndufb11,Cox6b1,Etfb,Ndufs8,Ndufs2,Ndufb6,Ndufs6,Ndufs5,Sco2
2_Member	KEGG Pathway	mmu05014	Amyotrophic lateral sclerosis - Mus musculus (house mouse)	-23.3075	-20.7883	Actb,Actg1,Atp5a1,Atp5b,Atp5g1,Atp5j,Bad,Bax,Cox4i1,Cox5a,Cox5b,Cox6a1,Cox6c,Cox7a1,Cox7a2,Cox7c,Cox8a,Cox8b,Cycs,Gpx1,Gpx3,Hspa5,Ndufa2,Ndufa4,Sigmar1,Pfn1,Psma2,Psmb4,Psmb5,Psmb6,Psmc2,Psmc3,Sem1,Cox7a2l,Alyref,Tnfrsf1a,Tnfrsf1b,Tuba1a,Tuba1b,Tuba1c,Tubb2a,Tubb5,Uqcrq,Psma5,Psma7,Psmb3,Atp5o,Dctn3,Ndufa1,Ubqln2,Vapb,Psmd8,Atp5d,Ndufb5,Ndufa3,Cox7b,Uqcr10,Ndufb9,Ndufc1,Ndufa12,Ndufa7,Cyc1,Ndufb3…
2_Member	GO Biological Processes	GO:0006091	generation of precursor metabolites and energy	-23.1658	-20.6542	Atp5a1,Atp5b,Atp5j,Atp5k,Bax,Coq7,Cox4i1,Cox5a,Cox5b,Cox6a1,Cox6c,Cox7a1,Cox7a2,Cox7c,Cox8a,Cox8b,Cycs,Bloc1s1,Gpd1,Gnas,Idh3g,Ldha,Lep,Mdh2,Mdh1,Ndufa2,Plec,Ppp1ca,Prps1,S100b,Cox7a2l,Sod2,Taldo1,Uqcrq,Atp5o,Ndufa1,Suclg1,Slc37a2,Atp5j2,Gabarapl1,Thap11,Atp5d,Ndufb5,Ndufa3,Cox7b,Uqcr10,Pgls,Ndufb9,Ndufc1,Ndufa12,Ndufa7,Cyc1,Ndufb3,Uqcrh,Uqcr11,Ndufb7,Atp5e,Ndufa6,Ndufa13,Ndufb8,Ndufa10,Uqcrb,Mtl…
2_Member	GO Biological Processes	GO:0046034	ATP metabolic process	-22.5946	-20.0906	Ak1,Aldoa,Atp5a1,Atp5b,Atp5g1,Atp5j,Atp5k,Bad,Cfh,Guk1,Hspa8,Ndufa2,Tgfb1,Atp5l,Atp5o,Ndufa1,Ak3,Atp5j2,Atp5d,Ndufb5,Ndufa3,Ndufb9,Ndufc1,Ndufa12,Ndufa7,Ndufb3,Ndufb7,Atp5e,Ndufa6,Ndufa13,Ndufb8,Ndufa10,Atp5g2,Ndufb4,Ndufc2,Ndufb2,Ndufa5,Ndufb10,Ndufa8,Ndufa11,Ndufab1,Atp5h,Ndufv3,Ndufb11,Uqcc3,Ndufs8,Ndufs2,Atp5g3,Ndufb6,Ndufs6,Ndufs5,Ndufb1
2_Member	KEGG Pathway	mmu05022	Pathways of neurodegeneration - multiple diseases - Mus musculus (house mouse)	-21.9358	-19.4466	Slc25a4,Slc25a5,Atp5a1,Atp5b,Atp5g1,Atp5j,Bad,Bax,Calm1,Calm3,Ctnnb1,Cox4i1,Cox5a,Cox5b,Cox6a1,Cox6c,Cox7a1,Cox7a2,Cox7c,Cox8a,Cox8b,Csf1,Cybb,Cycs,Fzd1,Gpx1,Gpx3,Hspa5,Hsd17b10,Hras,Ndufa2,Ndufa4,Sigmar1,Prkcb,Prnp,Psma2,Psmb4,Psmb5,Psmb6,Psmc2,Psmc3,Sem1,Cox7a2l,Tnfrsf1a,Tnfrsf1b,Tuba1a,Tuba1b,Tuba1c,Tubb2a,Tubb5,Uba52,Ubb,Ubc,Uba1,Uqcrq,Psma5,Psma7,Psmb3,Atp5o,Nox4,Dctn3,Gria3,Ndufa1,Vapb,Psmd…
2_Member	WikiPathways	WP1248	Oxidative phosphorylation	-21.515	-19.0538	Atp5a1,Atp5b,Atp5g1,Atp5j,Ndufa2,Atp5l,Atp5o,Atp5j2,Atp5d,Ndufb5,Ndufb9,Ndufc1,Ndufa7,Ndufb7,Atp5e,Ndufa6,Ndufb8,Ndufa10,Atp5g2,Ndufc2,Ndufb2,Ndufa5,Ndufb10,Ndufa8,Ndufa11,Atp5h,Ndufv3,Ndufs8,Ndufs2,Atp5g3,Ndufb6,Ndufs6,Ndufa4l2,Ndufs5
2_Member	GO Biological Processes	GO:0009205	purine ribonucleoside triphosphate metabolic process	-21.4092	-18.9547	Ak1,Aldoa,Atp5a1,Atp5b,Atp5g1,Atp5j,Atp5k,Bad,Cfh,Guk1,Hspa8,Ndufa2,Nme1,Nme2,Pnp,Ran,Tgfb1,Atp5l,Atp5o,Ndufa1,Ak3,Atp5j2,Atp5d,Ndufb5,Ndufa3,Ndufb9,Ndufc1,Ndufa12,Ndufa7,Ndufb3,Ndufb7,Atp5e,Ndufa6,Ndufa13,Ndufb8,Ndufa10,Atp5g2,Ndufb4,Ndufc2,Ndufb2,Ndufa5,Ndufb10,Ndufa8,Ndufa11,Ndufab1,Atp5h,Ndufv3,Ndufb11,Uqcc3,Ndufs8,Ndufs2,Atp5g3,Ndufb6,Ndufs6,Ndufs5,Ndufb1
2_Member	CORUM	CORUM:382	Respiratory chain complex I, mitochondrial	-21.1003	-18.659	Ndufa2,Ndufa4,Ndufa1,Ndufb5,Ndufa3,Ndufb9,Ndufa12,Ndufa7,Ndufb3,Ndufb7,Ndufa6,Ndufa13,Ndufb8,Ndufa10,Ndufb4,Ndufc2,Ndufb2,Ndufa5,Ndufb10,Ndufa8,Ndufa11,Ndufab1,Ndufv3,Ndufb11,Ndufs8,Ndufs2,Ndufb6,Ndufs6,Ndufs5
2_Member	GO Biological Processes	GO:0009199	ribonucleoside triphosphate metabolic process	-21.0114	-18.5765	Ak1,Aldoa,Atp5a1,Atp5b,Atp5g1,Atp5j,Atp5k,Bad,Cfh,Guk1,Hspa8,Ndufa2,Nme1,Nme2,Pnp,Ran,Tgfb1,Atp5l,Atp5o,Ctps,Ndufa1,Ak3,Atp5j2,Atp5d,Ndufb5,Ndufa3,Ndufb9,Ndufc1,Ndufa12,Ndufa7,Ndufb3,Ndufb7,Atp5e,Ndufa6,Ndufa13,Ndufb8,Ndufa10,Atp5g2,Ndufb4,Ndufc2,Ndufb2,Ndufa5,Ndufb10,Ndufa8,Ndufa11,Ndufab1,Atp5h,Ndufv3,Ndufb11,Uqcc3,Ndufs8,Ndufs2,Atp5g3,Ndufb6,Ndufs6,Ndufs5,Ndufb1
2_Member	GO Biological Processes	GO:0009144	purine nucleoside triphosphate metabolic process	-20.3853	-17.963	Ak1,Aldoa,Atp5a1,Atp5b,Atp5g1,Atp5j,Atp5k,Bad,Cfh,Guk1,Hspa8,Ndufa2,Nme1,Nme2,Pnp,Ran,Tgfb1,Atp5l,Atp5o,Ndufa1,Ak3,Atp5j2,Atp5d,Ndufb5,Ndufa3,Ndufb9,Ndufc1,Ndufa12,Ndufa7,Ndufb3,Ndufb7,Atp5e,Ndufa6,Ndufa13,Ndufb8,Ndufa10,Atp5g2,Ndufb4,Ndufc2,Ndufb2,Ndufa5,Ndufb10,Ndufa8,Ndufa11,Ndufab1,Atp5h,Ndufv3,Ndufb11,Uqcc3,Ndufs8,Ndufs2,Atp5g3,Ndufb6,Ndufs6,Ndufs5,Ndufb1
2_Member	GO Biological Processes	GO:0009141	nucleoside triphosphate metabolic process	-19.8597	-17.4556	Ak1,Aldoa,Atp5a1,Atp5b,Atp5g1,Atp5j,Atp5k,Bad,Cfh,Guk1,Hspa8,Ndufa2,Nme1,Nme2,Pnp,Ran,Tgfb1,Atp5l,Atp5o,Ctps,Ndufa1,Ak3,Smpdl3a,Atp5j2,Atp5d,Ndufb5,Ndufa3,Ndufb9,Ndufc1,Ndufa12,Ndufa7,Dctpp1,Ndufb3,Ndufb7,Atp5e,Ndufa6,Ndufa13,Ndufb8,Ndufa10,Atp5g2,Ndufb4,Ndufc2,Ndufb2,Ndufa5,Ndufb10,Ndufa8,Ndufa11,Ndufab1,Atp5h,Ndufv3,Ndufb11,Uqcc3,Ndufs8,Ndufs2,Atp5g3,Ndufb6,Ndufs6,Ndufs5,Ndufb1
2_Member	GO Biological Processes	GO:0007005	mitochondrion organization	-19.6792	-17.2811	Aip,Slc25a4,Slc25a5,Prdx3,Atpif1,Bad,Bax,Cav2,Cebpa,Cfh,Coq7,Cox17,Cox7a1,Cox7a2,Chchd2,Hsd17b10,Hspd1,Hsp90aa1,Ier3,Marcks,Grpel1,Ndufa2,Phb,Plec,Pnp,Rrm1,Cox7a2l,Sod2,Timm17a,Ucp2,Akt3,Jtb,Cln8,Mrpl17,Timm13,Timm8a1,Timm10,Siva1,Coa3,Dnlz,Timm23,Ndufa1,Higd1a,Timm22,Letm1,Dynll1,Mtch1,Gabarap,Park7,Gabarapl1,Tspan4,Atp5d,Ndufb5,Ndufa3,Tomm7,Ndufb9,Tmem126a,Cox20,Ndufc1,Cox14,Ndufa12,Fis1,Pam16,…
2_Member	GO Biological Processes	GO:0022900	electron transport chain	-18.55	-16.1856	Coq7,Cox4i1,Cox5a,Cox5b,Cox6a1,Cox6c,Cox7a1,Cox7a2,Cox7c,Cox8a,Cox8b,Cycs,Gpd1,Ndufa2,Plec,Cox7a2l,Sod2,Uqcrq,Slc37a2,Thap11,Cox7b,Uqcr10,Ndufb9,Ndufa12,Ndufa7,Cyc1,Ndufb3,Uqcrh,Uqcr11,Ndufb8,Ndufa10,Uqcrb,Coa6,Fdx2,Ndufc2,Ndufa5,Ndufa8,Ndufv3,Cox4i2,Uqcc3,Etfb,Ndufs8,Ndufs2,Ndufb6,Ndufs6,Sco2
2_Member	CORUM	CORUM:381	Respiratory chain complex I, mitochondrial	-18.4175	-16.0586	Ndufa2,Ndufa4,Ndufb5,Ndufa3,Ndufb9,Ndufa12,Ndufa7,Ndufb3,Ndufb7,Ndufa6,Ndufa13,Ndufb8,Ndufa10,Ndufb4,Ndufc2,Ndufa5,Ndufb10,Ndufa8,Ndufab1,Ndufv3,Ndufb11,Ndufs8,Ndufs2,Ndufb6,Ndufs6,Ndufs5
2_Member	GO Biological Processes	GO:0009152	purine ribonucleotide biosynthetic process	-18.2701	-15.9321	Adcy7,Ak1,Aldoa,Aprt,Atp5a1,Atp5b,Atp5g1,Atp5j,Atp5k,Guk1,Ndufa2,Nme1,Nme2,Npr1,Pnp,Tgfb1,Atp5l,Atp5o,Ndufa1,Ak3,Atp5j2,Gucy1a1,Atp5d,Ndufb5,Ndufa3,Ndufb9,Ndufc1,Ndufa12,Ndufa7,Ndufb3,Ndufb7,Atp5e,Ndufa6,Ndufa13,Ndufb8,Ndufa10,Atp5g2,Ndufb4,Ndufc2,Ndufb2,Ndufa5,Ndufb10,Ndufa8,Ndufa11,Ndufab1,Mpc2,Atp5h,Ndufv3,Acly,Ndufb11,Uqcc3,Ndufs8,Ndufs2,Atp5g3,Ndufb6,Ndufs6,Ndufs5,Ndufb1
2_Member	GO Biological Processes	GO:0009260	ribonucleotide biosynthetic process	-18.0646	-15.7317	Adcy7,Ak1,Aldoa,Aprt,Atp5a1,Atp5b,Atp5g1,Atp5j,Atp5k,Guk1,Ndufa2,Nme1,Nme2,Npr1,Pnp,Tgfb1,Atp5l,Atp5o,Ctps,Rfk,Ndufa1,Ak3,Atp5j2,Gucy1a1,Atp5d,Ndufb5,Ndufa3,Ndufb9,Ndufc1,Ndufa12,Ndufa7,Ndufb3,Ndufb7,Atp5e,Ndufa6,Ndufa13,Ndufb8,Ndufa10,Atp5g2,Ndufb4,Ndufc2,Ndufb2,Ndufa5,Ndufb10,Ndufa8,Ndufa11,Ndufab1,Mpc2,Atp5h,Ndufv3,Acly,Ndufb11,Uqcc3,Ndufs8,Ndufs2,Atp5g3,Ndufb6,Ndufs6,Ndufs5,Ndufb1
2_Member	GO Biological Processes	GO:0046390	ribose phosphate biosynthetic process	-17.6002	-15.287	Adcy7,Ak1,Aldoa,Aprt,Atp5a1,Atp5b,Atp5g1,Atp5j,Atp5k,Guk1,Ndufa2,Nme1,Nme2,Npr1,Pnp,Prps1,Tgfb1,Atp5l,Atp5o,Ctps,Rfk,Ndufa1,Ak3,Atp5j2,Gucy1a1,Atp5d,Ndufb5,Ndufa3,Ndufb9,Ndufc1,Ndufa12,Ndufa7,Ndufb3,Ndufb7,Atp5e,Ndufa6,Ndufa13,Ndufb8,Ndufa10,Atp5g2,Ndufb4,Ndufc2,Ndufb2,Ndufa5,Ndufb10,Ndufa8,Ndufa11,Ndufab1,Mpc2,Atp5h,Ndufv3,Acly,Ndufb11,Uqcc3,Ndufs8,Ndufs2,Atp5g3,Ndufb6,Ndufs6,Ndufs5,Ndufb1
2_Member	GO Biological Processes	GO:0022904	respiratory electron transport chain	-17.4283	-15.12	Coq7,Cox4i1,Cox5a,Cox5b,Cox6a1,Cox6c,Cox7a1,Cox7a2,Cox7c,Cox8a,Cox8b,Cycs,Gpd1,Plec,Cox7a2l,Sod2,Uqcrq,Slc37a2,Cox7b,Uqcr10,Ndufb9,Ndufa12,Ndufa7,Cyc1,Uqcrh,Uqcr11,Ndufb8,Ndufa10,Uqcrb,Coa6,Ndufc2,Ndufa5,Ndufa8,Ndufv3,Cox4i2,Uqcc3,Etfb,Ndufs8,Ndufs2,Ndufb6,Ndufs6,Sco2
2_Member	GO Biological Processes	GO:0033108	mitochondrial respiratory chain complex assembly	-17.0452	-14.7416	Cox17,Ndufa2,Coa3,Ndufa1,Ndufb5,Ndufa3,Ndufb9,Tmem126a,Cox20,Ndufc1,Cox14,Ndufa12,Ndufb3,Ndufaf3,Tmem223,Ndufb7,Ndufa6,Ndufa13,Ndufb8,Uqcc2,Ndufa10,Stmp1,Ndufb4,Ndufc2,Ndufb2,Ndufa5,Ndufb10,Ndufa8,Ndufa11,Ndufab1,Coa5,Ndufb11,Uqcc3,Ndufaf8,Ndufs8,Ndufs2,Ndufb6,Ndufs6,Ndufs5,Sco2,Pet100,Ndufb1
2_Member	GO Biological Processes	GO:0042775	mitochondrial ATP synthesis coupled electron transport	-16.87	-14.5849	Coq7,Cox4i1,Cox5a,Cox5b,Cox6a1,Cox6c,Cox7a1,Cox7a2,Cox7c,Cox8a,Cox8b,Cycs,Cox7a2l,Uqcrq,Cox7b,Uqcr10,Ndufb9,Ndufa12,Ndufa7,Cyc1,Uqcrh,Uqcr11,Ndufb8,Ndufa10,Uqcrb,Coa6,Ndufc2,Ndufa8,Ndufv3,Cox4i2,Uqcc3,Ndufs8,Ndufs2,Ndufb6,Ndufs6
2_Member	GO Biological Processes	GO:0042773	ATP synthesis coupled electron transport	-16.3995	-14.1364	Coq7,Cox4i1,Cox5a,Cox5b,Cox6a1,Cox6c,Cox7a1,Cox7a2,Cox7c,Cox8a,Cox8b,Cycs,Cox7a2l,Uqcrq,Cox7b,Uqcr10,Ndufb9,Ndufa12,Ndufa7,Cyc1,Uqcrh,Uqcr11,Ndufb8,Ndufa10,Uqcrb,Coa6,Ndufc2,Ndufa8,Ndufv3,Cox4i2,Uqcc3,Ndufs8,Ndufs2,Ndufb6,Ndufs6
2_Member	GO Biological Processes	GO:0006164	purine nucleotide biosynthetic process	-16.3438	-14.0849	Adcy7,Ak1,Aldoa,Aprt,Atp5a1,Atp5b,Atp5g1,Atp5j,Atp5k,Guk1,Ndufa2,Nme1,Nme2,Npr1,Pnp,Prps1,Tgfb1,Oasl2,Atp5l,Atp5o,Ndufa1,Ak3,Atp5j2,Gucy1a1,Atp5d,Ndufb5,Ndufa3,Ndufb9,Ndufc1,Ndufa12,Ndufa7,Ndufb3,Ndufb7,Atp5e,Ndufa6,Ndufa13,Ndufb8,Ndufa10,Atp5g2,Ndufb4,Ndufc2,Ndufb2,Ndufa5,Ndufb10,Ndufa8,Ndufa11,Ndufab1,Mpc2,Atp5h,Ndufv3,Acly,Ndufb11,Uqcc3,Ndufs8,Ndufs2,Atp5g3,Ndufb6,Ndufs6,Ndufs5,Ndufb1
2_Member	GO Biological Processes	GO:0019646	aerobic electron transport chain	-15.6788	-13.4449	Cox4i1,Cox5a,Cox5b,Cox6a1,Cox6c,Cox7a1,Cox7a2,Cox7c,Cox8a,Cox8b,Cycs,Cox7a2l,Uqcrq,Cox7b,Uqcr10,Ndufb9,Ndufa7,Cyc1,Uqcrh,Uqcr11,Ndufb8,Ndufa10,Uqcrb,Ndufc2,Ndufa8,Cox4i2,Uqcc3,Ndufs8,Ndufs2,Ndufb6,Ndufs6
2_Member	GO Biological Processes	GO:0072522	purine-containing compound biosynthetic process	-15.4461	-13.2279	Adcy7,Ak1,Aldoa,Aprt,Atp5a1,Atp5b,Atp5g1,Atp5j,Atp5k,Guk1,Ndufa2,Nme1,Nme2,Npr1,Pnp,Prps1,Tgfb1,Oasl2,Atp5l,Atp5o,Ndufa1,Ak3,Atp5j2,Gucy1a1,Atp5d,Ndufb5,Ndufa3,Ndufb9,Ndufc1,Ndufa12,Ndufa7,Ndufb3,Ndufb7,Atp5e,Ndufa6,Ndufa13,Ndufb8,Ndufa10,Atp5g2,Ndufb4,Ndufc2,Ndufb2,Ndufa5,Ndufb10,Ndufa8,Ndufa11,Ndufab1,Mpc2,Atp5h,Ndufv3,Acly,Ndufb11,Uqcc3,Ndufs8,Ndufs2,Atp5g3,Ndufb6,Ndufs6,Ndufs5,Ndufb1
2_Member	GO Biological Processes	GO:0010257	NADH dehydrogenase complex assembly	-15.4249	-13.2182	Ndufa2,Ndufa1,Ndufb5,Ndufa3,Ndufb9,Tmem126a,Ndufc1,Ndufa12,Ndufb3,Ndufaf3,Ndufb7,Ndufa6,Ndufa13,Ndufb8,Ndufa10,Ndufb4,Ndufc2,Ndufb2,Ndufa5,Ndufb10,Ndufa8,Ndufa11,Ndufab1,Ndufb11,Ndufaf8,Ndufs8,Ndufs2,Ndufb6,Ndufs6,Ndufs5,Ndufb1
2_Member	GO Biological Processes	GO:0032981	mitochondrial respiratory chain complex I assembly	-15.4249	-13.2182	Ndufa2,Ndufa1,Ndufb5,Ndufa3,Ndufb9,Tmem126a,Ndufc1,Ndufa12,Ndufb3,Ndufaf3,Ndufb7,Ndufa6,Ndufa13,Ndufb8,Ndufa10,Ndufb4,Ndufc2,Ndufb2,Ndufa5,Ndufb10,Ndufa8,Ndufa11,Ndufab1,Ndufb11,Ndufaf8,Ndufs8,Ndufs2,Ndufb6,Ndufs6,Ndufs5,Ndufb1
2_Member	Reactome Gene Sets	R-MMU-6799198	Complex I biogenesis	-14.9705	-12.7894	Ndufa2,Ndufa1,Ndufb5,Ndufa3,Ndufb9,Ndufc1,Ndufa12,Ndufa7,Ndufb3,Ndufaf3,Ndufb7,Ndufa6,Ndufa13,Ndufb8,Ndufa10,Ndufb4,Ndufc2,Ndufb2,Ndufa5,Ndufb10,Ndufa8,Ndufab1,Ndufv3,Ndufb11,Ndufs8,Ndufs2,Ndufb6,Ndufs6,Ndufs5
2_Member	GO Biological Processes	GO:0009165	nucleotide biosynthetic process	-14.7699	-12.5959	Adcy7,Ak1,Aldoa,Aprt,Atp5a1,Atp5b,Atp5g1,Atp5j,Atp5k,Guk1,Ndufa2,Nme1,Nme2,Npr1,Pnp,Prps1,Rrm1,Tgfb1,Oasl2,Atp5l,Atp5o,Ctps,Rfk,Ndufa1,Ak3,Atp5j2,Gucy1a1,Atp5d,Ndufb5,Ndufa3,Ndufb9,Ndufc1,Ndufa12,Ndufa7,Ndufb3,Ndufb7,Atp5e,Ndufa6,Ndufa13,Ndufb8,Ndufa10,Atp5g2,Ndufb4,Ndufc2,Ndufb2,Ndufa5,Ndufb10,Ndufa8,Ndufa11,Ndufab1,Mpc2,Atp5h,Ndufv3,Acly,Ndufb11,Uqcc3,Ndufs8,Ndufs2,Atp5g3,Ndufb6,Ndufs6,Ndufs5,N…
2_Member	GO Biological Processes	GO:1901293	nucleoside phosphate biosynthetic process	-14.1931	-12.0462	Adcy7,Ak1,Aldoa,Aprt,Atp5a1,Atp5b,Atp5g1,Atp5j,Atp5k,Guk1,Ndufa2,Nme1,Nme2,Npr1,Pnp,Prps1,Rrm1,Tgfb1,Oasl2,Atp5l,Atp5o,Ctps,Rfk,Ndufa1,Ak3,Atp5j2,Gucy1a1,Atp5d,Ndufb5,Ndufa3,Ndufb9,Ndufc1,Ndufa12,Ndufa7,Ndufb3,Ndufb7,Atp5e,Ndufa6,Ndufa13,Ndufb8,Ndufa10,Atp5g2,Ndufb4,Ndufc2,Ndufb2,Ndufa5,Ndufb10,Ndufa8,Ndufa11,Ndufab1,Mpc2,Atp5h,Ndufv3,Acly,Ndufb11,Uqcc3,Ndufs8,Ndufs2,Atp5g3,Ndufb6,Ndufs6,Ndufs5,N…
2_Member	GO Biological Processes	GO:0006163	purine nucleotide metabolic process	-12.8757	-10.7727	Adcy7,Ak1,Aldoa,Aprt,Atp5a1,Atp5b,Atp5g1,Atp5j,Atp5k,Bad,Entpd1,Cfh,Fasn,Gpd1,Guk1,Hint1,Hspa8,Idh3g,Ldha,Mdh2,Mdh1,Ncf1,Ncf2,Ndufa2,Nme1,Nme2,Npr1,Pnp,Prps1,Ran,Sult1e1,Taldo1,Tgfb1,Oasl2,Atp5l,Atp5o,Nt5c,Ndufa1,Prdx5,Ak3,Suclg1,Atp5j2,Gucy1a1,Atp5d,Ndufb5,Ndufa3,Pgls,Ndufb9,Ndufc1,Ndufa12,Ndufa7,Ndufb3,Ndufb7,Atp5e,Ndufa6,Ndufa13,Ndufb8,Ndufa10,Dcxr,Atp5g2,Ndufb4,Ndufc2,Ndufb2,Ndufa5,Ndufb10,Nd…
2_Member	GO Biological Processes	GO:0006753	nucleoside phosphate metabolic process	-12.52	-10.4272	Adcy7,Ak1,Aldoa,Aprt,Atp5a1,Atp5b,Atp5g1,Atp5j,Atp5k,Bad,Entpd1,Entpd2,Cfh,Fasn,Gpd1,Guk1,Hint1,Hspa8,Idh3g,Ldha,Mdh2,Mdh1,Ncf1,Ncf2,Ndufa2,Nme1,Nme2,Npr1,Pnp,Prps1,Ran,Rrm1,Sult1e1,Taldo1,Tgfb1,Oasl2,Atp5l,Atp5o,Nt5c,Ctps,Rfk,Ndufa1,Prdx5,Ak3,Suclg1,Smpdl3a,Park7,Atp5j2,Gucy1a1,Atp5d,Ndufb5,Ndufa3,Pgls,Ndufb9,Ndufc1,Ndufa12,Ndufa7,Dctpp1,Ndufb3,Ndufb7,Atp5e,Ndufa6,Ndufa13,Ndufb8,Ndufa10,Dcxr,Atp…
2_Member	GO Biological Processes	GO:0072521	purine-containing compound metabolic process	-12.4371	-10.3558	Adcy7,Ak1,Aldoa,Aprt,Atp5a1,Atp5b,Atp5g1,Atp5j,Atp5k,Bad,Entpd1,Cfh,Fasn,Gamt,Gpd1,Guk1,Hint1,Hspa8,Idh3g,Ldha,Mdh2,Mdh1,Ncf1,Ncf2,Ndufa2,Nme1,Nme2,Npr1,Pnp,Prps1,Ran,Sult1e1,Taldo1,Tgfb1,Oasl2,Abcg2,Abcg3,Atp5l,Atp5o,Nt5c,Ndufa1,Prdx5,Ak3,Suclg1,Icmt,Atp5j2,Gucy1a1,Atp5d,Ndufb5,Ndufa3,Pgls,Ndufb9,Ndufc1,Ndufa12,Ndufa7,Ndufb3,Ndufb7,Atp5e,Ndufa6,Ndufa13,Ndufb8,Ndufa10,Dcxr,Atp5g2,Ndufb4,Ndufc2,Nd…
2_Member	GO Biological Processes	GO:0009117	nucleotide metabolic process	-12.3301	-10.256	Adcy7,Ak1,Aldoa,Aprt,Atp5a1,Atp5b,Atp5g1,Atp5j,Atp5k,Bad,Entpd1,Cfh,Fasn,Gpd1,Guk1,Hint1,Hspa8,Idh3g,Ldha,Mdh2,Mdh1,Ncf1,Ncf2,Ndufa2,Nme1,Nme2,Npr1,Pnp,Prps1,Ran,Rrm1,Sult1e1,Taldo1,Tgfb1,Oasl2,Atp5l,Atp5o,Nt5c,Ctps,Rfk,Ndufa1,Prdx5,Ak3,Suclg1,Park7,Atp5j2,Gucy1a1,Atp5d,Ndufb5,Ndufa3,Pgls,Ndufb9,Ndufc1,Ndufa12,Ndufa7,Dctpp1,Ndufb3,Ndufb7,Atp5e,Ndufa6,Ndufa13,Ndufb8,Ndufa10,Dcxr,Atp5g2,Ndufb4,Nduf…
2_Member	GO Biological Processes	GO:0090407	organophosphate biosynthetic process	-11.7851	-9.74814	Adcy7,Ak1,Aldoa,Aprt,Atp5a1,Atp5b,Atp5g1,Atp5j,Atp5k,Socs3,Ckb,Guk1,Hexb,Fabp5,Ndufa2,Nme1,Nme2,Npr1,Pik3cd,Pip5k1c,Pip5k1b,Pla2g4a,Pnp,Prps1,Ptafr,Rrm1,Scp2,Tgfb1,Tpi1,Oasl2,Atp5l,Atp5o,Ctps,Cdipt,Rfk,Ndufa1,Agpat1,Ak3,Atp5j2,Akr1a1,Gucy1a1,Atp5d,Ndufb5,Ndufa3,Ndufb9,Pigyl,Ndufc1,Ndufa12,Ndufa7,Ndufb3,Ndufb7,Atp5e,Ndufa6,Ndufa13,Ndufb8,Ndufa10,Agpat2,Dcxr,Atp5g2,Ndufb4,Ndufc2,Ndufb2,Ndufa5,Agpat…
2_Member	GO Biological Processes	GO:0009150	purine ribonucleotide metabolic process	-11.7801	-9.74573	Adcy7,Ak1,Aldoa,Aprt,Atp5a1,Atp5b,Atp5g1,Atp5j,Atp5k,Bad,Entpd1,Cfh,Fasn,Guk1,Hint1,Hspa8,Ndufa2,Nme1,Nme2,Npr1,Pnp,Ran,Sult1e1,Tgfb1,Atp5l,Atp5o,Nt5c,Ndufa1,Ak3,Suclg1,Atp5j2,Gucy1a1,Atp5d,Ndufb5,Ndufa3,Ndufb9,Ndufc1,Ndufa12,Ndufa7,Ndufb3,Ndufb7,Atp5e,Ndufa6,Ndufa13,Ndufb8,Ndufa10,Atp5g2,Ndufb4,Ndufc2,Ndufb2,Ndufa5,Ndufb10,Ndufa8,Pmvk,Ndufa11,Ndufab1,Mpc2,Atp5h,Ndufv3,Acly,Ndufb11,Uqcc3,Pde2a,Hm…
2_Member	GO Biological Processes	GO:0055086	nucleobase-containing small molecule metabolic process	-11.4478	-9.43085	Adcy7,Ak1,Aldoa,Aprt,Atp5a1,Atp5b,Atp5g1,Atp5j,Atp5k,Bad,Entpd1,Entpd2,Cfh,Cmah,Fasn,Gamt,Gpd1,Gfpt2,Guk1,Hint1,Hspa8,Idh3g,Ldha,Mdh2,Mdh1,Ncf1,Ncf2,Ndufa2,Nme1,Nme2,Npr1,Pnp,Prps1,Ran,Rrm1,Sult1e1,Taldo1,Tgfb1,Oasl2,Atp5l,Atp5o,Nt5c,Ctps,Rfk,Ndufa1,Prdx5,Ak3,Suclg1,Icmt,Smpdl3a,Park7,Atp5j2,Gucy1a1,Atp5d,Ndufb5,Ndufa3,Pgls,Ndufb9,Ndufc1,Ndufa12,Ndufa7,Dctpp1,Ndufb3,Ndufb7,Atp5e,Ndufa6,Ndufa13,Nd…
2_Member	GO Biological Processes	GO:0009259	ribonucleotide metabolic process	-11.4128	-9.39828	Adcy7,Ak1,Aldoa,Aprt,Atp5a1,Atp5b,Atp5g1,Atp5j,Atp5k,Bad,Entpd1,Cfh,Fasn,Guk1,Hint1,Hspa8,Ndufa2,Nme1,Nme2,Npr1,Pnp,Ran,Sult1e1,Tgfb1,Atp5l,Atp5o,Nt5c,Ctps,Rfk,Ndufa1,Ak3,Suclg1,Atp5j2,Gucy1a1,Atp5d,Ndufb5,Ndufa3,Ndufb9,Ndufc1,Ndufa12,Ndufa7,Ndufb3,Ndufb7,Atp5e,Ndufa6,Ndufa13,Ndufb8,Ndufa10,Atp5g2,Ndufb4,Ndufc2,Ndufb2,Ndufa5,Ndufb10,Ndufa8,Pmvk,Ndufa11,Ndufab1,Mpc2,Atp5h,Ndufv3,Acly,Ndufb11,Uqcc3…
2_Member	GO Biological Processes	GO:0019693	ribose phosphate metabolic process	-11.1467	-9.1441	Adcy7,Ak1,Aldoa,Aprt,Atp5a1,Atp5b,Atp5g1,Atp5j,Atp5k,Bad,Entpd1,Cfh,Fasn,Guk1,Hint1,Hspa8,Ndufa2,Nme1,Nme2,Npr1,Pnp,Prps1,Ran,Sult1e1,Tgfb1,Atp5l,Atp5o,Nt5c,Ctps,Rfk,Ndufa1,Ak3,Suclg1,Atp5j2,Gucy1a1,Atp5d,Ndufb5,Ndufa3,Ndufb9,Ndufc1,Ndufa12,Ndufa7,Ndufb3,Ndufb7,Atp5e,Ndufa6,Ndufa13,Ndufb8,Ndufa10,Atp5g2,Ndufb4,Ndufc2,Ndufb2,Ndufa5,Ndufb10,Ndufa8,Pmvk,Ndufa11,Ndufab1,Mpc2,Atp5h,Ndufv3,Acly,Ndufb11…
2_Member	GO Biological Processes	GO:1901137	carbohydrate derivative biosynthetic process	-10.2985	-8.34916	Adcy7,Ak1,Aldoa,Aprt,Atp5a1,Atp5b,Atp5g1,Atp5j,Atp5k,Ccnd3,Dad1,Ddost,Gcnt1,Gfpt2,Guk1,Ndufa2,Nme1,Nme2,Npr1,Pnp,Prps1,Rrm1,St6galnac3,St8sia4,Phlda1,Tgfb1,Tpi1,Plod3,Atp5l,Atp5o,Serp1,St6galnac6,Ctps,Rfk,Ndufa1,Ak3,Tmem59,Atp5j2,Akr1a1,Gucy1a1,Atp5d,Ndufb5,Krtcap2,Ndufa3,Ndufb9,Alg5,Pigyl,Ostc,Ndufc1,Ndufa12,Ndufa7,Ndufb3,Ndufb7,Atp5e,Ndufa6,Ndufa13,Ndufb8,Ndufa10,Nanp,Slc39a8,Ost4,Dcxr,Atp5g2,N…
2_Member	KEGG Pathway	mmu04723	Retrograde endocannabinoid signaling - Mus musculus (house mouse)	-10.0207	-8.08977	Adcy7,Gnai2,Gnb2,Gng10,Gng2,Gng5,Gngt2,Ndufa2,Ndufa4,Prkcb,Gria3,Ndufa1,Ndufb5,Gng11,Ndufa3,Ndufb9,Ndufc1,Ndufa12,Ndufa7,Ndufb3,Ndufb7,Ndufa6,Ndufa13,Ndufb8,Ndufa10,Ndufb4,Ndufc2,Ndufb2,Ndufa5,Ndufb10,Ndufa8,Ndufa11,Ndufab1,Ndufv3,Ndufb11,Ndufs8,Ndufs2,Ndufb6,Ndufs6,Ndufa4l2,Ndufs5
3_Summary	Reactome Gene Sets	R-MMU-6798695	Neutrophil degranulation	-38.4836	-35.5586	Aldoa,Prdx6,Aprt,Atp6v0c,B2m,Commd3,C3,C3ar1,C5ar1,Anxa2,Cct2,Cd14,Cd36,Cd44,Cd53,Cd63,Cd68,Cnn2,Cst3,Cstb,Ctsb,Ctsc,Ctsd,Ctsh,Ctss,Cyba,Cybb,Cd55,Ddost,Degs1,Ear2,Eef1a1,Eef2,Stom,Fcer1g,Fcgr2b,Fcna,Fgl2,Fgr,Folr2,Fth1,Gm2a,Lilrb4b,Lilrb4a,Grn,Cxcl1,Gstp1,H2-K1,H2-Q4,H2-Q7,H2-T23,Ptpn6,Hexb,Hp,Hspa8,Hsp90ab1,Hsp90aa1,Ifi204,Itgal,Itgb2,Fabp5,Lamp1,Lcn2,Irag2,Cd93,Lyz2,Man2b1,Mif,Nme2,Slc11a1,Orm…
3_Member	Reactome Gene Sets	R-MMU-6798695	Neutrophil degranulation	-38.4836	-35.5586	Aldoa,Prdx6,Aprt,Atp6v0c,B2m,Commd3,C3,C3ar1,C5ar1,Anxa2,Cct2,Cd14,Cd36,Cd44,Cd53,Cd63,Cd68,Cnn2,Cst3,Cstb,Ctsb,Ctsc,Ctsd,Ctsh,Ctss,Cyba,Cybb,Cd55,Ddost,Degs1,Ear2,Eef1a1,Eef2,Stom,Fcer1g,Fcgr2b,Fcna,Fgl2,Fgr,Folr2,Fth1,Gm2a,Lilrb4b,Lilrb4a,Grn,Cxcl1,Gstp1,H2-K1,H2-Q4,H2-Q7,H2-T23,Ptpn6,Hexb,Hp,Hspa8,Hsp90ab1,Hsp90aa1,Ifi204,Itgal,Itgb2,Fabp5,Lamp1,Lcn2,Irag2,Cd93,Lyz2,Man2b1,Mif,Nme2,Slc11a1,Orm…
4_Summary	GO Biological Processes	GO:0050865	regulation of cell activation	-24.0298	-21.5027	Actb,Aif1,Apoe,Slc7a1,B2m,Bad,Prdm1,Zfp36l1,Zfp36l2,Btk,Ctnnb1,Runx1,Cd37,Cd38,Cd44,Cd59a,Cd81,Cd83,Cd84,Cd86,Cd9,Cdkn1a,Cebpa,Cebpb,Coro1a,Ccr2,Csf1r,Ctla2a,Ctsc,Cd55,Dpp4,Efnb1,Efnb2,Fcer1g,Fcgr2b,Fes,Fgl2,Fgr,Fn1,Gli3,Pdpn,Lilrb4b,Lilrb4a,Grn,H2-Aa,H2-Ab1,H2-Eb1,H2-DMb1,Ptpn6,Hes1,Hfe,Hmox1,Hsph1,Hspb1,Hspd1,Hsp90aa1,Id2,Ighm,Cd74,Il16,Il2ra,Il4ra,Il7r,Inpp5d,Itgal,Itgam,Itgb2,F11r,Jund,Lamp1,…
4_Member	GO Biological Processes	GO:0050865	regulation of cell activation	-24.0298	-21.5027	Actb,Aif1,Apoe,Slc7a1,B2m,Bad,Prdm1,Zfp36l1,Zfp36l2,Btk,Ctnnb1,Runx1,Cd37,Cd38,Cd44,Cd59a,Cd81,Cd83,Cd84,Cd86,Cd9,Cdkn1a,Cebpa,Cebpb,Coro1a,Ccr2,Csf1r,Ctla2a,Ctsc,Cd55,Dpp4,Efnb1,Efnb2,Fcer1g,Fcgr2b,Fes,Fgl2,Fgr,Fn1,Gli3,Pdpn,Lilrb4b,Lilrb4a,Grn,H2-Aa,H2-Ab1,H2-Eb1,H2-DMb1,Ptpn6,Hes1,Hfe,Hmox1,Hsph1,Hspb1,Hspd1,Hsp90aa1,Id2,Ighm,Cd74,Il16,Il2ra,Il4ra,Il7r,Inpp5d,Itgal,Itgam,Itgb2,F11r,Jund,Lamp1,…
4_Member	GO Biological Processes	GO:0002694	regulation of leukocyte activation	-21.7862	-19.3042	Actb,Aif1,Slc7a1,B2m,Bad,Prdm1,Zfp36l1,Zfp36l2,Btk,Ctnnb1,Runx1,Cd37,Cd38,Cd44,Cd59a,Cd81,Cd83,Cd84,Cd86,Cdkn1a,Cebpa,Cebpb,Coro1a,Ccr2,Csf1r,Ctla2a,Ctsc,Cd55,Dpp4,Efnb1,Efnb2,Fcer1g,Fcgr2b,Fes,Fgl2,Fgr,Fn1,Gli3,Lilrb4b,Lilrb4a,Grn,H2-Aa,H2-Ab1,H2-Eb1,H2-DMb1,Ptpn6,Hes1,Hfe,Hmox1,Hsph1,Hspb1,Hspd1,Hsp90aa1,Id2,Ighm,Cd74,Il16,Il2ra,Il4ra,Il7r,Inpp5d,Itgal,Itgam,Itgb2,Jund,Lamp1,Laptm5,Lep,Lgals1,L…
4_Member	GO Biological Processes	GO:0045785	positive regulation of cell adhesion	-18.8897	-16.5144	Actb,Adam19,Aif1,Slc7a1,B2m,Bad,Calr,Runx1,Cd36,Cd44,Cd59a,Cd63,Cd81,Cd83,Cd86,Cdc42,Cdh13,Cdk6,Cfl1,Coro1a,Ccr2,Ccr5,Csf1,Dab2,Cd55,Dpp4,Efnb1,Efnb2,Emp2,Fbln2,Flot1,Fmn1,Fn1,Gcnt1,Gli3,Pdpn,Lilrb4b,Lilrb4a,Adgrg1,H2-Aa,H2-Ab1,H2-Eb1,H2-DMb1,Ptpn6,Hes1,Hsph1,Hspd1,Hsp90aa1,Cd74,Il2ra,Il4ra,Il7r,Itga4,Itga5,Itgal,Itgb1,Itgb2,F11r,Kdr,Lama2,Lep,Lgals1,Anxa1,Kitl,Ninj1,P4hb,Pdgfb,Plaur,Pnp,Ptafr,Pt…
4_Member	GO Biological Processes	GO:0051249	regulation of lymphocyte activation	-18.3945	-16.0409	Actb,Aif1,Slc7a1,B2m,Bad,Prdm1,Zfp36l1,Zfp36l2,Btk,Ctnnb1,Runx1,Cd37,Cd38,Cd44,Cd59a,Cd81,Cd83,Cd86,Cdkn1a,Cebpb,Coro1a,Ccr2,Csf1r,Ctla2a,Cd55,Dpp4,Efnb1,Efnb2,Fcgr2b,Fgl2,Fgr,Gli3,Lilrb4b,Lilrb4a,H2-Aa,H2-Ab1,H2-Eb1,H2-DMb1,Ptpn6,Hes1,Hfe,Hsph1,Hspb1,Hspd1,Hsp90aa1,Id2,Ighm,Cd74,Il2ra,Il4ra,Il7r,Inpp5d,Itgal,Lamp1,Laptm5,Lep,Lgals1,Lgals3,Sh2b3,Anxa1,Lst1,Lyn,Mef2c,Kitl,Mif,Mmp14,Myd88,Nfatc2,Pn…
4_Member	GO Biological Processes	GO:0022407	regulation of cell-cell adhesion	-16.5422	-14.2705	Adipoq,Actb,Adam19,Aif1,Slc7a1,B2m,Bad,Bmp6,Runx1,Cd37,Cd44,Cd59a,Cd81,Cd83,Cd86,Cd9,Cebpb,Coro1a,Ccr2,Ccr5,Cd55,Dpp4,Efnb1,Efnb2,Fgl2,Flot1,Gcnt1,Gli3,Pdpn,Lilrb4b,Lilrb4a,Gstp1,H2-Aa,H2-Ab1,H2-Eb1,H2-DMb1,Ptpn6,Hes1,Hfe,Hsph1,Hspb1,Hspd1,Hsp90aa1,Cd74,Il2ra,Il4ra,Il7r,Itga4,Itgal,Itgb2,F11r,Klf4,Laptm5,Lep,Lgals1,Lgals3,Sh2b3,Anxa1,Lyn,Kitl,Plaur,Pnp,Prkg1,Prnp,Ptafr,Ptpn22,Ptprc,Ccl2,Ccl5,Cxcl…
4_Member	GO Biological Processes	GO:0032944	regulation of mononuclear cell proliferation	-15.4385	-13.2241	Aif1,Slc7a1,Btk,Ctnnb1,Cd37,Cd38,Cd44,Cd59a,Cd81,Cd86,Cdkn1a,Cebpb,Coro1a,Ccr2,Csf1,Csf1r,Cd55,Efnb1,Fcgr2b,Lilrb4b,Lilrb4a,H2-Aa,H2-DMb1,Ptpn6,Hes1,Ighm,Cd74,Il2ra,Inpp5d,Itgal,Laptm5,Lep,Lgals3,Anxa1,Lst1,Lyn,Mef2c,Kitl,Mif,Myd88,Nfatc2,Pnp,Prnp,Ptpn22,Ptprc,Rac2,Ccl5,Syk,Sdc4,Tgfb1,Tnfrsf1b,Tsc2,Tyrobp,Vcam1,Ikzf3,Ccl19,Tnfsf13b,Rps3,Icosl,Twsg1,Pycard,Selenok,Gpnmb,Tnfrsf21,Nckap1l,Card11,Rip…
4_Member	GO Biological Processes	GO:0050670	regulation of lymphocyte proliferation	-15.2469	-13.0477	Aif1,Slc7a1,Btk,Ctnnb1,Cd37,Cd38,Cd44,Cd59a,Cd81,Cd86,Cdkn1a,Cebpb,Coro1a,Ccr2,Csf1r,Cd55,Efnb1,Fcgr2b,Lilrb4b,Lilrb4a,H2-Aa,H2-DMb1,Ptpn6,Hes1,Ighm,Cd74,Il2ra,Inpp5d,Itgal,Laptm5,Lep,Lgals3,Anxa1,Lst1,Lyn,Mef2c,Kitl,Mif,Myd88,Nfatc2,Pnp,Prnp,Ptpn22,Ptprc,Rac2,Ccl5,Syk,Sdc4,Tgfb1,Tnfrsf1b,Tsc2,Tyrobp,Vcam1,Ikzf3,Ccl19,Tnfsf13b,Rps3,Icosl,Twsg1,Pycard,Selenok,Gpnmb,Tnfrsf21,Nckap1l,Card11,Ripor2,C…
4_Member	GO Biological Processes	GO:0050867	positive regulation of cell activation	-15.0882	-12.8927	Actb,Aif1,Slc7a1,B2m,Bad,Btk,Runx1,Cd38,Cd59a,Cd81,Cd83,Cd86,Cdkn1a,Cebpa,Coro1a,Ccr2,Csf1r,Ctsc,Cd55,Dpp4,Efnb1,Efnb2,Fcer1g,Fgr,Gli3,Pdpn,Lilrb4b,Lilrb4a,H2-Aa,H2-Ab1,H2-Eb1,H2-DMb1,Hes1,Hsph1,Hspd1,Hsp90aa1,Ighm,Cd74,Il16,Il2ra,Il4ra,Il7r,Inpp5d,Itgal,Itgam,Itgb2,Jund,Lamp1,Lep,Lgals1,Anxa1,Mef2c,Kitl,Mif,Mmp14,Myd88,Nfatc2,Ddr2,Pdgfb,Pla2g4a,Pnp,Ptafr,Ptpn22,Ptprc,Ccl2,Ccl5,Spi1,Sox4,Syk,Tgfb…
4_Member	GO Biological Processes	GO:0070663	regulation of leukocyte proliferation	-15.0328	-12.841	Aif1,Slc7a1,Btk,Ctnnb1,Cd37,Cd38,Cd44,Cd59a,Cd81,Cd86,Cdkn1a,Cebpb,Coro1a,Ccr2,Cnn2,Csf1,Csf1r,Csf2rb,Cd55,Efnb1,Fcgr2b,Lilrb4b,Lilrb4a,Gstp1,H2-Aa,H2-DMb1,Ptpn6,Hes1,Ighm,Cd74,Il2ra,Inpp5d,Itgal,Laptm5,Lep,Lgals3,Anxa1,Lst1,Lyn,Mef2c,Kitl,Mif,Myd88,Nfatc2,Pnp,Prnp,Ptpn22,Ptprc,Rac2,Ccl5,Syk,Sdc4,Tgfb1,Tnfrsf1b,Tsc2,Tyrobp,Vcam1,Ikzf3,Ccl19,Tnfsf13b,Rps3,Icosl,Twsg1,Pycard,Selenok,Gpnmb,Tnfrsf21,…
4_Member	GO Biological Processes	GO:1903037	regulation of leukocyte cell-cell adhesion	-14.7494	-12.579	Actb,Aif1,Slc7a1,B2m,Bad,Runx1,Cd37,Cd44,Cd59a,Cd81,Cd83,Cd86,Cebpb,Coro1a,Ccr2,Cd55,Dpp4,Efnb1,Efnb2,Fgl2,Gcnt1,Gli3,Lilrb4b,Lilrb4a,Gstp1,H2-Aa,H2-Ab1,H2-Eb1,H2-DMb1,Ptpn6,Hes1,Hfe,Hsph1,Hspb1,Hspd1,Hsp90aa1,Cd74,Il2ra,Il4ra,Il7r,Itga4,Itgal,Itgb2,Klf4,Laptm5,Lep,Lgals1,Lgals3,Anxa1,Kitl,Pnp,Prnp,Ptafr,Ptpn22,Ptprc,Ccl2,Ccl5,Cxcl12,Sox4,Syk,Sdc4,Prdx2,Tgfb1,Thy1,Tsc2,Vcam1,Ets1,Ccl19,Tnfsf13b,R…
4_Member	GO Biological Processes	GO:0002696	positive regulation of leukocyte activation	-14.7388	-12.5717	Actb,Aif1,Slc7a1,B2m,Bad,Btk,Runx1,Cd38,Cd59a,Cd81,Cd83,Cd86,Cdkn1a,Cebpa,Coro1a,Ccr2,Csf1r,Ctsc,Cd55,Dpp4,Efnb1,Efnb2,Fcer1g,Fgr,Gli3,Lilrb4b,Lilrb4a,H2-Aa,H2-Ab1,H2-Eb1,H2-DMb1,Hes1,Hsph1,Hspd1,Hsp90aa1,Ighm,Cd74,Il16,Il2ra,Il4ra,Il7r,Inpp5d,Itgal,Itgam,Itgb2,Jund,Lamp1,Lep,Lgals1,Anxa1,Mef2c,Kitl,Mif,Mmp14,Myd88,Nfatc2,Pla2g4a,Pnp,Ptafr,Ptpn22,Ptprc,Ccl2,Ccl5,Spi1,Sox4,Syk,Tgfb1,Thbs1,Thy1,Tyr…
4_Member	GO Biological Processes	GO:0050863	regulation of T cell activation	-13.9968	-11.8532	Actb,Aif1,Slc7a1,B2m,Bad,Prdm1,Ctnnb1,Runx1,Cd37,Cd44,Cd59a,Cd81,Cd83,Cd86,Cebpb,Coro1a,Ccr2,Ctla2a,Cd55,Dpp4,Efnb1,Efnb2,Fgl2,Gli3,Lilrb4b,Lilrb4a,H2-Aa,H2-Ab1,H2-Eb1,H2-DMb1,Ptpn6,Hes1,Hfe,Hsph1,Hspb1,Hspd1,Hsp90aa1,Cd74,Il2ra,Il4ra,Il7r,Itgal,Laptm5,Lep,Lgals1,Lgals3,Sh2b3,Anxa1,Kitl,Pnp,Prnp,Ptpn22,Ptprc,Rac2,Ccl2,Ccl5,Sox4,Syk,Sdc4,Prdx2,Tgfb1,Thy1,Tnfrsf1b,Tsc2,Vcam1,Ccl19,Tnfsf13b,Rps3,Ico…
4_Member	GO Biological Processes	GO:0051251	positive regulation of lymphocyte activation	-12.3114	-10.2426	Actb,Aif1,Slc7a1,B2m,Bad,Btk,Runx1,Cd38,Cd59a,Cd81,Cd83,Cd86,Cdkn1a,Coro1a,Ccr2,Csf1r,Cd55,Dpp4,Efnb1,Efnb2,Gli3,Lilrb4b,Lilrb4a,H2-Aa,H2-Ab1,H2-Eb1,H2-DMb1,Hes1,Hsph1,Hspd1,Hsp90aa1,Ighm,Cd74,Il2ra,Il4ra,Il7r,Inpp5d,Itgal,Lamp1,Lep,Lgals1,Anxa1,Mef2c,Kitl,Mif,Mmp14,Myd88,Nfatc2,Pnp,Ptpn22,Ptprc,Ccl2,Ccl5,Spi1,Sox4,Syk,Tgfb1,Thy1,Tyrobp,Vcam1,Ccl19,Tnfsf13b,Axl,Rps3,Icosl,Pycard,Selenok,Pik3r6,Nc…
4_Member	GO Biological Processes	GO:0022409	positive regulation of cell-cell adhesion	-12.2085	-10.1425	Actb,Adam19,Aif1,Slc7a1,B2m,Bad,Runx1,Cd44,Cd59a,Cd81,Cd83,Cd86,Coro1a,Ccr2,Ccr5,Cd55,Dpp4,Efnb1,Efnb2,Flot1,Gcnt1,Gli3,Pdpn,Lilrb4b,Lilrb4a,H2-Aa,H2-Ab1,H2-Eb1,H2-DMb1,Hes1,Hsph1,Hspd1,Hsp90aa1,Cd74,Il2ra,Il4ra,Il7r,Itga4,Itgal,Itgb2,F11r,Lep,Lgals1,Anxa1,Kitl,Plaur,Pnp,Ptafr,Ptpn22,Ptprc,Ccl2,Ccl5,Sox4,Syk,Tgfb1,Thy1,Vcam1,Ets1,Ccl19,Tnfsf13b,Rps3,Podxl,Icosl,Pycard,Selenok,Fstl3,Pik3r6,Nckap1l…
4_Member	GO Biological Processes	GO:1903039	positive regulation of leukocyte cell-cell adhesion	-11.6473	-9.62539	Actb,Aif1,Slc7a1,B2m,Bad,Runx1,Cd44,Cd59a,Cd81,Cd83,Cd86,Coro1a,Ccr2,Cd55,Dpp4,Efnb1,Efnb2,Gcnt1,Gli3,Lilrb4b,Lilrb4a,H2-Aa,H2-Ab1,H2-Eb1,H2-DMb1,Hes1,Hsph1,Hspd1,Hsp90aa1,Cd74,Il2ra,Il4ra,Il7r,Itga4,Itgal,Itgb2,Lep,Lgals1,Anxa1,Kitl,Pnp,Ptafr,Ptpn22,Ptprc,Ccl2,Ccl5,Sox4,Syk,Tgfb1,Thy1,Vcam1,Ets1,Ccl19,Tnfsf13b,Rps3,Icosl,Pycard,Selenok,Pik3r6,Nckap1l,Il1rl2,Card11,Itpkb,Gm5150,Sirpb1b
4_Member	GO Biological Processes	GO:0050870	positive regulation of T cell activation	-10.653	-8.67561	Actb,Aif1,Slc7a1,B2m,Bad,Runx1,Cd59a,Cd81,Cd83,Cd86,Coro1a,Ccr2,Cd55,Dpp4,Efnb1,Efnb2,Gli3,Lilrb4b,Lilrb4a,H2-Aa,H2-Ab1,H2-Eb1,H2-DMb1,Hes1,Hsph1,Hspd1,Hsp90aa1,Cd74,Il2ra,Il4ra,Il7r,Itgal,Lep,Lgals1,Anxa1,Kitl,Pnp,Ptpn22,Ptprc,Ccl2,Ccl5,Sox4,Syk,Tgfb1,Thy1,Vcam1,Ccl19,Tnfsf13b,Rps3,Icosl,Pycard,Selenok,Pik3r6,Nckap1l,Il1rl2,Card11,Itpkb,Gm5150,Sirpb1b
4_Member	GO Biological Processes	GO:0070665	positive regulation of leukocyte proliferation	-10.1186	-8.18277	Aif1,Slc7a1,Btk,Cd38,Cd59a,Cd81,Cd86,Cdkn1a,Coro1a,Ccr2,Csf1,Csf1r,Csf2rb,Cd55,Efnb1,H2-DMb1,Hes1,Ighm,Cd74,Il2ra,Itgal,Lep,Anxa1,Lyn,Mef2c,Kitl,Mif,Myd88,Nfatc2,Pnp,Ptpn22,Ptprc,Rac2,Ccl5,Syk,Vcam1,Ccl19,Tnfsf13b,Rps3,Icosl,Pycard,Selenok,Nckap1l,Card11,Gpr183,Ighd
4_Member	GO Biological Processes	GO:0042129	regulation of T cell proliferation	-10.1087	-8.17572	Aif1,Slc7a1,Ctnnb1,Cd37,Cd44,Cd59a,Cd81,Cd86,Cebpb,Coro1a,Ccr2,Cd55,Efnb1,Lilrb4b,Lilrb4a,H2-Aa,H2-DMb1,Ptpn6,Hes1,Il2ra,Itgal,Laptm5,Lep,Lgals3,Anxa1,Kitl,Pnp,Prnp,Ptpn22,Ptprc,Rac2,Ccl5,Syk,Sdc4,Tgfb1,Tnfrsf1b,Tsc2,Vcam1,Ccl19,Tnfsf13b,Rps3,Icosl,Twsg1,Pycard,Selenok,Gpnmb,Tnfrsf21,Nckap1l,Card11,Ripor2
4_Member	GO Biological Processes	GO:0032946	positive regulation of mononuclear cell proliferation	-9.91442	-7.99336	Aif1,Slc7a1,Btk,Cd38,Cd59a,Cd81,Cd86,Cdkn1a,Coro1a,Ccr2,Csf1,Csf1r,Cd55,Efnb1,H2-DMb1,Hes1,Ighm,Cd74,Il2ra,Itgal,Lep,Anxa1,Mef2c,Kitl,Mif,Myd88,Nfatc2,Pnp,Ptpn22,Ptprc,Ccl5,Syk,Vcam1,Ccl19,Tnfsf13b,Rps3,Icosl,Pycard,Selenok,Nckap1l,Card11,Gpr183,Ighd
4_Member	GO Biological Processes	GO:0050671	positive regulation of lymphocyte proliferation	-9.63039	-7.73034	Aif1,Slc7a1,Btk,Cd38,Cd59a,Cd81,Cd86,Cdkn1a,Coro1a,Ccr2,Csf1r,Cd55,Efnb1,H2-DMb1,Hes1,Ighm,Cd74,Il2ra,Itgal,Lep,Anxa1,Mef2c,Kitl,Mif,Myd88,Nfatc2,Pnp,Ptpn22,Ptprc,Ccl5,Syk,Vcam1,Ccl19,Tnfsf13b,Rps3,Icosl,Pycard,Selenok,Nckap1l,Card11,Gpr183,Ighd
4_Member	GO Biological Processes	GO:0042102	positive regulation of T cell proliferation	-6.87932	-5.18479	Aif1,Slc7a1,Cd59a,Cd81,Cd86,Coro1a,Ccr2,Cd55,Efnb1,H2-DMb1,Hes1,Il2ra,Itgal,Lep,Anxa1,Kitl,Pnp,Ptpn22,Ptprc,Ccl5,Syk,Vcam1,Ccl19,Tnfsf13b,Rps3,Icosl,Pycard,Selenok,Nckap1l,Card11
5_Summary	GO Biological Processes	GO:2000147	positive regulation of cell motility	-21.5551	-19.0801	Acp5,Actg1,Agt,Aif1,Aldoa,Anxa3,Aqp1,Arf6,Rhob,Rhoc,Atp5a1,Atp5b,Bsg,C3ar1,C5ar1,Calr,Cd151,Cdc42,Cdh13,Cdh5,Cfl1,Coro1a,Ccr2,Ackr3,Col18a1,Col1a1,Creb3,Csf1,Csf1r,Ctsh,Cyp1b1,Dab2,S1pr1,Egr1,Fgr,Flt1,Fn1,Gnai2,Rack1,Pdpn,Lpar1,Grn,Hspa5,Hbegf,Hmox1,Hras,Hspb1,Igfbp5,Cd74,Itga4,Itga5,Itgb1,Kdr,Lcn2,Lgals3,Anxa1,Lyn,Kitl,Mmp14,Mmp2,Fam89b,Myo1f,Nos3,Ntn1,Ddr2,Pak1,Pdgfb,Pdgfra,Pecam1,Pfn1,Pik3cd,L…
5_Member	GO Biological Processes	GO:2000147	positive regulation of cell motility	-21.5551	-19.0801	Acp5,Actg1,Agt,Aif1,Aldoa,Anxa3,Aqp1,Arf6,Rhob,Rhoc,Atp5a1,Atp5b,Bsg,C3ar1,C5ar1,Calr,Cd151,Cdc42,Cdh13,Cdh5,Cfl1,Coro1a,Ccr2,Ackr3,Col18a1,Col1a1,Creb3,Csf1,Csf1r,Ctsh,Cyp1b1,Dab2,S1pr1,Egr1,Fgr,Flt1,Fn1,Gnai2,Rack1,Pdpn,Lpar1,Grn,Hspa5,Hbegf,Hmox1,Hras,Hspb1,Igfbp5,Cd74,Itga4,Itga5,Itgb1,Kdr,Lcn2,Lgals3,Anxa1,Lyn,Kitl,Mmp14,Mmp2,Fam89b,Myo1f,Nos3,Ntn1,Ddr2,Pak1,Pdgfb,Pdgfra,Pecam1,Pfn1,Pik3cd,L…
5_Member	GO Biological Processes	GO:0030335	positive regulation of cell migration	-21.5398	-19.0718	Acp5,Actg1,Agt,Aif1,Aldoa,Anxa3,Aqp1,Arf6,Rhob,Rhoc,Atp5a1,Atp5b,Bsg,C3ar1,C5ar1,Calr,Cd151,Cdc42,Cdh13,Cdh5,Coro1a,Ccr2,Ackr3,Col18a1,Col1a1,Creb3,Csf1,Csf1r,Ctsh,Cyp1b1,Dab2,S1pr1,Egr1,Fgr,Flt1,Fn1,Gnai2,Rack1,Pdpn,Lpar1,Grn,Hspa5,Hbegf,Hmox1,Hras,Hspb1,Igfbp5,Cd74,Itga4,Itga5,Itgb1,Kdr,Lcn2,Lgals3,Anxa1,Lyn,Kitl,Mmp14,Mmp2,Fam89b,Myo1f,Nos3,Ddr2,Pak1,Pdgfb,Pdgfra,Pecam1,Pfn1,Pik3cd,Lgmn,Ptafr,…
5_Member	GO Biological Processes	GO:0040017	positive regulation of locomotion	-21.335	-18.8871	Acp5,Actg1,Agt,Aif1,Aldoa,Anxa3,Aqp1,Arf6,Rhob,Rhoc,Atp5a1,Atp5b,Bsg,C3ar1,C5ar1,Calr,Cd151,Cdc42,Cdh13,Cdh5,Cfl1,Coro1a,Ccr2,Ackr3,Col18a1,Col1a1,Creb3,Csf1,Csf1r,Ctsh,Cyp1b1,Dab2,S1pr1,Egr1,Fgr,Flt1,Fn1,Gnai2,Rack1,Pdpn,Lpar1,Grn,Hspa5,Hbegf,Hmox1,Hras,Hspb1,Igfbp5,Cd74,Il16,Itga4,Itga5,Itgb1,Kdr,Lcn2,Lgals3,Anxa1,Lyn,Kitl,Mmp14,Mmp2,Fam89b,Myo1f,Nos3,Ntn1,Ddr2,Pak1,Pdgfb,Pdgfra,Pecam1,Pfn1,Pik…
6_Summary	GO Biological Processes	GO:0001775	cell activation	-20.7912	-18.3627	Agt,Aif1,Slc25a5,Anxa3,B2m,Bax,Bcl3,Zfp36l1,Zfp36l2,Btk,C1qa,C5ar1,Ctnnb1,Ccnd3,Cd151,Cd37,Cd38,Entpd1,Entpd2,Cd44,Cd48,Cd81,Cd83,Cd84,Cd86,Cdk6,Cebpb,Cfh,Coro1a,Clu,Csf1r,Ctsl,Ddost,Dpp4,Efnb1,Egr1,Emp2,Bcl11a,Evl,Fcer1g,Fcgr2b,Fcgr3,Fgl2,Fn1,Fyn,Gja1,Gli3,Gnas,Lilrb4b,Lilrb4a,Grn,Pdia3,H2-Ab1,Cfb,Ptpn6,Hes1,Hspd1,Hyal2,Irf8,Id2,Ifnar2,Ighm,Igkc,Cd74,Il2ra,Il4ra,Il7r,Irf4,Itgal,Itgam,Itgb2,Mafb,…
6_Member	GO Biological Processes	GO:0001775	cell activation	-20.7912	-18.3627	Agt,Aif1,Slc25a5,Anxa3,B2m,Bax,Bcl3,Zfp36l1,Zfp36l2,Btk,C1qa,C5ar1,Ctnnb1,Ccnd3,Cd151,Cd37,Cd38,Entpd1,Entpd2,Cd44,Cd48,Cd81,Cd83,Cd84,Cd86,Cdk6,Cebpb,Cfh,Coro1a,Clu,Csf1r,Ctsl,Ddost,Dpp4,Efnb1,Egr1,Emp2,Bcl11a,Evl,Fcer1g,Fcgr2b,Fcgr3,Fgl2,Fn1,Fyn,Gja1,Gli3,Gnas,Lilrb4b,Lilrb4a,Grn,Pdia3,H2-Ab1,Cfb,Ptpn6,Hes1,Hspd1,Hyal2,Irf8,Id2,Ifnar2,Ighm,Igkc,Cd74,Il2ra,Il4ra,Il7r,Irf4,Itgal,Itgam,Itgb2,Mafb,…
6_Member	GO Biological Processes	GO:0045321	leukocyte activation	-18.9572	-16.5762	Aif1,Slc25a5,Anxa3,B2m,Bax,Bcl3,Zfp36l1,Zfp36l2,Btk,C1qa,C5ar1,Ctnnb1,Ccnd3,Cd151,Cd37,Cd38,Cd44,Cd48,Cd81,Cd83,Cd84,Cd86,Cdk6,Cebpb,Coro1a,Clu,Csf1r,Ctsl,Ddost,Dpp4,Efnb1,Egr1,Emp2,Bcl11a,Fcer1g,Fcgr2b,Fcgr3,Fgl2,Fyn,Gja1,Gli3,Lilrb4b,Lilrb4a,Grn,H2-Ab1,Cfb,Ptpn6,Hes1,Hspd1,Hyal2,Irf8,Id2,Ifnar2,Ighm,Igkc,Cd74,Il2ra,Il4ra,Il7r,Irf4,Itgal,Itgam,Itgb2,Mafb,Lcp2,Lep,Lfng,Lgals1,Anxa1,Ltbr,Blnk,Cd18…
6_Member	GO Biological Processes	GO:0046649	lymphocyte activation	-15.6745	-13.4445	Slc25a5,B2m,Bax,Bcl3,Zfp36l1,Zfp36l2,Btk,Ctnnb1,Ccnd3,Cd151,Cd37,Cd38,Cd44,Cd48,Cd81,Cd83,Cd84,Cd86,Cdk6,Cebpb,Coro1a,Ctsl,Ddost,Dpp4,Efnb1,Egr1,Emp2,Bcl11a,Fcer1g,Fcgr2b,Fgl2,Fyn,Gja1,Gli3,Lilrb4a,H2-Ab1,Cfb,Ptpn6,Hes1,Hspd1,Irf8,Id2,Ifnar2,Ighm,Igkc,Cd74,Il2ra,Il4ra,Il7r,Irf4,Itgal,Itgam,Itgb2,Mafb,Lep,Lfng,Lgals1,Anxa1,Blnk,Cd180,Mef2c,Kitl,Slc11a1,Prdx1,Phb,Pik3cd,Prkcb,Lcp1,Pnp,Pou2f2,Psap,P…
6_Member	GO Biological Processes	GO:0002521	leukocyte differentiation	-13.15	-11.0318	Slc25a5,B2m,Bax,Bcl3,Zfp36l1,Zfp36l2,Btk,Ctnnb1,Runx1,Cbfa2t3,Cd81,Cd83,Cdk6,Cebpa,Csf1,Csf1r,Ctsl,Dpp4,Egr1,Bcl11a,Fasn,Fcer1g,Gli3,Gpc3,H2-Ab1,Irf8,Id2,Ifi203,Ifi204,Ifnar2,Ighm,Igkc,Cd74,Il4ra,Il7r,Irf4,Itgam,Junb,Mafb,Lep,Lfng,Lgals1,Anxa1,Ltbr,Lyn,Mef2c,Kitl,Myd88,Pirb,Pnp,Pou2f2,Psap,Ptger4,Ptpn22,Ptprc,Rbpj,Rpl22,Rps6,Rras,Sema4a,Spi1,Sfrp1,Sox4,Syk,Tgfb1,Tnfrsf11a,Tpd52,Trf,Tyrobp,Ucp2,Va…
6_Member	GO Biological Processes	GO:0042110	T cell activation	-12.4442	-10.3587	B2m,Bax,Bcl3,Zfp36l1,Zfp36l2,Ctnnb1,Ccnd3,Cd151,Cd37,Cd44,Cd48,Cd83,Cd84,Cd86,Cdk6,Cebpb,Coro1a,Ctsl,Ddost,Dpp4,Efnb1,Egr1,Bcl11a,Fcer1g,Fgl2,Fyn,Gja1,Gli3,Lilrb4a,Ptpn6,Hes1,Hspd1,Ifnar2,Cd74,Il2ra,Il4ra,Il7r,Irf4,Itgal,Itgam,Itgb2,Mafb,Lep,Lfng,Anxa1,Kitl,Slc11a1,Lcp1,Pnp,Psap,Psmb10,Ptger4,Ptpn22,Ptprc,Rpl22,Rps6,Cxcl12,Sema4a,Spi1,Slfn2,Sox4,Syk,Prdx2,Tgfb1,Tsc2,Vav1,Ikzf1,Ikzf3,Ccl19,Tnfsf13…
6_Member	GO Biological Processes	GO:1903131	mononuclear cell differentiation	-10.4432	-8.48113	Slc25a5,B2m,Bax,Bcl3,Zfp36l1,Zfp36l2,Btk,Ctnnb1,Cd83,Cdk6,Csf1,Ctsl,Dpp4,Egr1,Bcl11a,Fasn,Fcer1g,Gli3,H2-Ab1,Irf8,Id2,Ifi203,Ifi204,Ifnar2,Ighm,Igkc,Cd74,Il4ra,Il7r,Irf4,Mafb,Lep,Lfng,Lgals1,Anxa1,Ltbr,Lyn,Mef2c,Pirb,Pnp,Pou2f2,Psap,Ptger4,Ptpn22,Ptprc,Rbpj,Rpl22,Rps6,Sema4a,Spi1,Sox4,Syk,Tgfb1,Tpd52,Vav1,Ikzf1,Ikzf3,Ccl19,Tnfsf13b,Ubd,Axl,Dnajb9,Hdac7,Tmem176b,Nfam1,Tusc2,Trem2,Dock2,Slamf9,Cmtm…
6_Member	GO Biological Processes	GO:0042113	B cell activation	-7.22368	-5.5065	Slc25a5,Bax,Bcl3,Btk,Cd38,Cd86,Dpp4,Bcl11a,Fcgr2b,H2-Ab1,Cfb,Hspd1,Irf8,Id2,Ighm,Igkc,Il7r,Lfng,Lgals1,Blnk,Cd180,Mef2c,Phb,Pik3cd,Prkcb,Pnp,Pou2f2,Ptprc,Rbpj,Spi1,Syk,Tpd52,Tsc2,Ikzf1,Ikzf3,Tnfsf13b,Dnajb9,Icosl,Ctps,Hdac7,Lat2,Nfam1,Cmtm7,Card11,Plcg2,Bank1,Gpr183,Ighd
6_Member	GO Biological Processes	GO:0030098	lymphocyte differentiation	-6.61109	-4.95294	Slc25a5,B2m,Bax,Bcl3,Zfp36l1,Zfp36l2,Btk,Ctnnb1,Cd83,Cdk6,Ctsl,Dpp4,Egr1,Bcl11a,Fcer1g,Gli3,H2-Ab1,Irf8,Id2,Ifnar2,Ighm,Igkc,Cd74,Il4ra,Il7r,Irf4,Mafb,Lep,Lfng,Lgals1,Anxa1,Pnp,Pou2f2,Psap,Ptger4,Ptpn22,Ptprc,Rbpj,Rpl22,Rps6,Sema4a,Spi1,Sox4,Syk,Tgfb1,Tpd52,Vav1,Ikzf1,Ikzf3,Tnfsf13b,Axl,Dnajb9,Hdac7,Nfam1,Tusc2,Dock2,Cmtm7,Card11,Plcg2,Prex1,Itpkb,Gpr183
6_Member	GO Biological Processes	GO:0030217	T cell differentiation	-5.3857	-3.86658	B2m,Bcl3,Zfp36l1,Zfp36l2,Ctnnb1,Cd83,Cdk6,Ctsl,Egr1,Bcl11a,Fcer1g,Gli3,Ifnar2,Cd74,Il4ra,Il7r,Irf4,Mafb,Lep,Lfng,Anxa1,Pnp,Psap,Ptger4,Ptpn22,Ptprc,Rpl22,Rps6,Sema4a,Spi1,Sox4,Syk,Tgfb1,Vav1,Ikzf1,Ikzf3,Dock2,Card11,Prex1,Itpkb,Gpr183
6_Member	GO Biological Processes	GO:0030183	B cell differentiation	-3.97829	-2.62891	Slc25a5,Bax,Bcl3,Btk,Dpp4,Bcl11a,H2-Ab1,Irf8,Id2,Ighm,Igkc,Lfng,Lgals1,Pnp,Pou2f2,Ptprc,Rbpj,Spi1,Syk,Tpd52,Ikzf1,Ikzf3,Tnfsf13b,Dnajb9,Hdac7,Nfam1,Cmtm7,Card11,Plcg2,Gpr183
7_Summary	Reactome Gene Sets	R-MMU-109582	Hemostasis	-20.3675	-17.9514	Actg1,Alb,Aldoa,Anxa5,Rhob,Serping1,Anxa2,Calm1,Calm3,Capza2,Cd36,Cd44,Cd48,Cd63,Cd84,Cd9,Cdc42,Clu,Col1a1,Col1a2,Dok2,Ecm1,Ehd1,Fcer1g,Fgr,Fn1,Fyn,Gna11,Gnai2,Gnas,Gnb2,Gng10,Gng2,Gng5,Gngt2,Pdpn,Gpc1,H3f3a,H3f3b,Ptpn6,Hras,Cd74,Inpp5d,Itga4,Itga5,Itgal,Itgb1,Itgb2,F11r,Lcp2,Sh2b3,Lyn,Mif,Nos3,Orm1,Orm2,P2ry1,Pdgfb,Pecam1,Prkcb,Pla2g4a,Plat,Plaur,Lgals3bp,Srgn,Prkg1,Psap,Tmsb4x,Rac2,Rasgrp2,S100…
7_Member	Reactome Gene Sets	R-MMU-109582	Hemostasis	-20.3675	-17.9514	Actg1,Alb,Aldoa,Anxa5,Rhob,Serping1,Anxa2,Calm1,Calm3,Capza2,Cd36,Cd44,Cd48,Cd63,Cd84,Cd9,Cdc42,Clu,Col1a1,Col1a2,Dok2,Ecm1,Ehd1,Fcer1g,Fgr,Fn1,Fyn,Gna11,Gnai2,Gnas,Gnb2,Gng10,Gng2,Gng5,Gngt2,Pdpn,Gpc1,H3f3a,H3f3b,Ptpn6,Hras,Cd74,Inpp5d,Itga4,Itga5,Itgal,Itgb1,Itgb2,F11r,Lcp2,Sh2b3,Lyn,Mif,Nos3,Orm1,Orm2,P2ry1,Pdgfb,Pecam1,Prkcb,Pla2g4a,Plat,Plaur,Lgals3bp,Srgn,Prkg1,Psap,Tmsb4x,Rac2,Rasgrp2,S100…
7_Member	Reactome Gene Sets	R-MMU-76002	Platelet activation, signaling and aggregation	-15.6271	-13.4051	Actg1,Alb,Aldoa,Anxa5,Rhob,Serping1,Calm1,Calm3,Cd36,Cd63,Cd9,Cdc42,Clu,Col1a1,Col1a2,Ecm1,Fcer1g,Fn1,Fyn,Gna11,Gnai2,Gnb2,Gng10,Gng2,Gng5,Gngt2,Pdpn,Ptpn6,Lcp2,Lyn,Orm1,Orm2,P2ry1,Pdgfb,Pecam1,Prkcb,Pla2g4a,Lgals3bp,Srgn,Psap,Tmsb4x,Rac2,Rasgrp2,Selenop,Sparc,Syk,Tagln2,Tgfb1,Tgfb2,Timp1,Timp3,Trf,Vav1,Islr,Plek,Rapgef4,Pf4,Gng11,Rarres2,Endod1,Cyb5r1,F13a1,Maged2,Pik3r6,Fermt3,Plcg2,Pik3r5
7_Member	Reactome Gene Sets	R-MMU-76005	Response to elevated platelet cytosolic Ca2+	-11.8026	-9.76055	Actg1,Alb,Aldoa,Anxa5,Serping1,Calm1,Calm3,Cd36,Cd63,Cd9,Clu,Ecm1,Fn1,Orm1,Orm2,Pdgfb,Pecam1,Prkcb,Lgals3bp,Srgn,Psap,Tmsb4x,Selenop,Sparc,Tagln2,Tgfb1,Tgfb2,Timp1,Timp3,Trf,Islr,Plek,Pf4,Rarres2,Endod1,Cyb5r1,F13a1,Maged2,Fermt3
7_Member	Reactome Gene Sets	R-MMU-114608	Platelet degranulation	-11.7637	-9.73177	Actg1,Alb,Aldoa,Anxa5,Serping1,Calm1,Calm3,Cd36,Cd63,Cd9,Clu,Ecm1,Fn1,Orm1,Orm2,Pdgfb,Pecam1,Lgals3bp,Srgn,Psap,Tmsb4x,Selenop,Sparc,Tagln2,Tgfb1,Tgfb2,Timp1,Timp3,Trf,Islr,Plek,Pf4,Rarres2,Endod1,Cyb5r1,F13a1,Maged2,Fermt3
8_Summary	Reactome Gene Sets	R-MMU-9711123	Cellular response to chemical stress	-19.8771	-17.467	Alb,Prdx3,Prdx6,Cox4i1,Cox5a,Cox6a1,Cox7c,Cox8a,Cyba,Cybb,Cycs,Gpx1,Gpx3,Gstp1,Hmox1,Psmb8,Ncf1,Ncf2,Ndufa4,P4hb,Prdx1,Psma2,Psmb10,Psmb4,Psmb5,Psmb6,Psmc2,Psmc3,Psme2,Cox7a2l,Sod2,Sod3,Prdx2,Txn1,Uba52,Ubb,Ubc,Akt3,Psma5,Psma7,Psmb3,Nox4,Psmd10,Prdx5,Rbx1,Psmd8,Cox7b,Cox20,Cox14,Map1lc3b,Srxn1,Rps27a,Cox6b1,Blvrb,Sco2,Hbb-bs,Hbb-bt,Atp6v1e1,Atp6v0e,Atp6v0c,Capza2,Cdk6,Cdkn1a,Cebpb,Cryab,Eef1a1,H…
8_Member	Reactome Gene Sets	R-MMU-9711123	Cellular response to chemical stress	-19.8771	-17.467	Alb,Prdx3,Prdx6,Cox4i1,Cox5a,Cox6a1,Cox7c,Cox8a,Cyba,Cybb,Cycs,Gpx1,Gpx3,Gstp1,Hmox1,Psmb8,Ncf1,Ncf2,Ndufa4,P4hb,Prdx1,Psma2,Psmb10,Psmb4,Psmb5,Psmb6,Psmc2,Psmc3,Psme2,Cox7a2l,Sod2,Sod3,Prdx2,Txn1,Uba52,Ubb,Ubc,Akt3,Psma5,Psma7,Psmb3,Nox4,Psmd10,Prdx5,Rbx1,Psmd8,Cox7b,Cox20,Cox14,Map1lc3b,Srxn1,Rps27a,Cox6b1,Blvrb,Sco2,Hbb-bs,Hbb-bt
8_Member	Reactome Gene Sets	R-MMU-8953897	Cellular responses to stimuli	-17.7006	-15.3777	Alb,Prdx3,Prdx6,Atp6v1e1,Atp6v0e,Atp6v0c,Capza2,Cdk6,Cdkn1a,Cebpb,Cox4i1,Cox5a,Cox6a1,Cox7c,Cox8a,Cryab,Cyba,Cybb,Cycs,Eef1a1,Gpx1,Gpx3,Hspa5,Gstp1,H1f0,Hmox1,Hspa8,Hsph1,Hsp90ab1,Hsp90aa1,Psmb8,Mt1,Mt2,Ncf1,Ncf2,Ndufa4,P4hb,Prdx1,Psma2,Psmb10,Psmb4,Psmb5,Psmb6,Psmc2,Psmc3,Psme2,Cox7a2l,Sod2,Sod3,Prdx2,Tuba1a,Tuba1b,Tuba1c,Tubb2a,Txn1,Uba52,Ubb,Ubc,Akt3,Ets1,Ets2,Psma5,Psma7,Psmb3,Nox4,Psmd10,Dct…
8_Member	Reactome Gene Sets	R-MMU-2262752	Cellular responses to stress	-16.9509	-14.6612	Alb,Prdx3,Prdx6,Atp6v1e1,Atp6v0e,Atp6v0c,Capza2,Cdk6,Cdkn1a,Cebpb,Cox4i1,Cox5a,Cox6a1,Cox7c,Cox8a,Cryab,Cyba,Cybb,Cycs,Eef1a1,Gpx1,Gpx3,Hspa5,Gstp1,H1f0,Hmox1,Hspa8,Hsph1,Hsp90ab1,Hsp90aa1,Psmb8,Ncf1,Ncf2,Ndufa4,P4hb,Prdx1,Psma2,Psmb10,Psmb4,Psmb5,Psmb6,Psmc2,Psmc3,Psme2,Cox7a2l,Sod2,Sod3,Prdx2,Tuba1a,Tuba1b,Tuba1c,Tubb2a,Txn1,Uba52,Ubb,Ubc,Akt3,Ets1,Ets2,Psma5,Psma7,Psmb3,Nox4,Psmd10,Dctn3,Prdx5…
8_Member	Reactome Gene Sets	R-MMU-5628897	TP53 Regulates Metabolic Genes	-8.71192	-6.88068	Cox4i1,Cox5a,Cox6a1,Cox7c,Cox8a,Cycs,Ndufa4,Prdx1,Cox7a2l,Prdx2,Txn1,Ywhah,Akt3,Prdx5,Lamtor4,Cox7b,Cox20,Cox14,Lamtor1,Rraga,Lamtor5,Ddit4,Lamtor2,Cox6b1,Sco2
8_Member	Reactome Gene Sets	R-MMU-9707564	Cytoprotection by HMOX1	-6.62023	-4.96028	Alb,Cox4i1,Cox5a,Cox6a1,Cox7c,Cox8a,Cycs,Hmox1,Ndufa4,Cox7a2l,Cox7b,Cox20,Cox14,Cox6b1,Blvrb,Sco2,Hbb-bs,Hbb-bt
8_Member	Reactome Gene Sets	R-MMU-3700989	Transcriptional Regulation by TP53	-6.09003	-4.49932	Bax,Ccng1,Cdkn1a,Cox4i1,Cox5a,Cox6a1,Cox7c,Cox8a,Cycs,Igfbp3,Mbd3,Polr2k,Ndufa4,Npm1,Prdx1,Pcna,Sgk1,Cox7a2l,Supt4a,Prdx2,Txn1,Uba52,Ubb,Ubc,Ywhah,Akt3,Pin1,Taf10,Zfp385a,Prdx5,Lamtor4,Cox7b,Cox20,Cox14,Polr2e,Polr2l,Prelid1,Lamtor1,Elob,Polr2g,Eloc,Kmt5a,Rraga,Lamtor5,Triap1,Polr2f,Polr2i,Ddit4,Rps27a,Lamtor2,Cox6b1,Chd3,Sco2
9_Summary	GO Biological Processes	GO:0006954	inflammatory response	-19.3515	-16.9592	Agt,Agtr1a,Aif1,Alox5ap,Bmp6,Btk,C1qa,Ciita,C3,C3ar1,C5ar1,Cd14,Cd44,Cd68,Cebpb,Cfh,Clu,Ccr2,Ccr5,Csf1,Csf1r,Cyba,Cybb,Dpep1,Ecm1,Mecom,Fasn,Fcer1g,Fcgr1,Fcgr3,Fn1,Gja1,Lilrb4a,Grn,Cxcl1,Hmox1,Hp,Il2ra,Il4ra,Itgam,Itgb1,Itgb2,Anxa1,Cd180,Ly86,Lyn,Clec10a,Mif,Myd88,Naip2,Ncf1,Ninj1,Slc11a1,Orm1,Orm2,Pik3cd,Ptafr,Ptger4,Rbpj,S100a8,Saa3,Ccl11,Ccl2,Ccl5,Ccl6,Ccl7,Ccl8,Ccl9,Serpina3n,Serpinb9,Syk,Prd…
9_Member	GO Biological Processes	GO:0006954	inflammatory response	-19.3515	-16.9592	Agt,Agtr1a,Aif1,Alox5ap,Bmp6,Btk,C1qa,Ciita,C3,C3ar1,C5ar1,Cd14,Cd44,Cd68,Cebpb,Cfh,Clu,Ccr2,Ccr5,Csf1,Csf1r,Cyba,Cybb,Dpep1,Ecm1,Mecom,Fasn,Fcer1g,Fcgr1,Fcgr3,Fn1,Gja1,Lilrb4a,Grn,Cxcl1,Hmox1,Hp,Il2ra,Il4ra,Itgam,Itgb1,Itgb2,Anxa1,Cd180,Ly86,Lyn,Clec10a,Mif,Myd88,Naip2,Ncf1,Ninj1,Slc11a1,Orm1,Orm2,Pik3cd,Ptafr,Ptger4,Rbpj,S100a8,Saa3,Ccl11,Ccl2,Ccl5,Ccl6,Ccl7,Ccl8,Ccl9,Serpina3n,Serpinb9,Syk,Prd…
10_Summary	GO Biological Processes	GO:0050900	leukocyte migration	-19.3234	-16.9368	Adora1,Bsg,C5ar1,Cd34,Cdc42,Coro1a,Ccr2,Cnn2,Csf1,Dpep1,S1pr1,Ednrb,Emp2,Eps8,Fcer1g,Fcgr3,Flt1,Gcnt1,Cxcl1,Il16,Itga4,Itgal,Itgam,Itgb1,Itgb2,F11r,Lep,Lgals3,Anxa1,Kitl,Mmp2,Myo1f,Ninj1,Pde4b,Pdgfb,Pecam1,Plec,Ppib,Ptpro,Rps19,S100a8,Ccl11,Ccl2,Ccl5,Ccl6,Ccl7,Ccl8,Ccl9,Cxcl12,Selplg,Syk,Rpl13a,Vav1,Vcam1,Ccl19,Ror2,Podxl,Ccl24,Pf4,Cxcl16,Jam2,Rtn4,Selenok,Slamf9,Itga9,Nckap1l,Abr,Ffar2,Myo1g,Ppi…
10_Member	GO Biological Processes	GO:0050900	leukocyte migration	-19.3234	-16.9368	Adora1,Bsg,C5ar1,Cd34,Cdc42,Coro1a,Ccr2,Cnn2,Csf1,Dpep1,S1pr1,Ednrb,Emp2,Eps8,Fcer1g,Fcgr3,Flt1,Gcnt1,Cxcl1,Il16,Itga4,Itgal,Itgam,Itgb1,Itgb2,F11r,Lep,Lgals3,Anxa1,Kitl,Mmp2,Myo1f,Ninj1,Pde4b,Pdgfb,Pecam1,Plec,Ppib,Ptpro,Rps19,S100a8,Ccl11,Ccl2,Ccl5,Ccl6,Ccl7,Ccl8,Ccl9,Cxcl12,Selplg,Syk,Rpl13a,Vav1,Vcam1,Ccl19,Ror2,Podxl,Ccl24,Pf4,Cxcl16,Jam2,Rtn4,Selenok,Slamf9,Itga9,Nckap1l,Abr,Ffar2,Myo1g,Ppi…
10_Member	GO Biological Processes	GO:0030595	leukocyte chemotaxis	-14.9862	-12.8016	Bsg,C5ar1,Coro1a,Ccr2,Dpep1,S1pr1,Ednrb,Fcer1g,Fcgr3,Flt1,Cxcl1,Il16,Itgam,Itgb2,Lgals3,Anxa1,Mmp2,Ninj1,Pde4b,Pdgfb,Plec,Ppib,Ptpro,Rps19,S100a8,Ccl11,Ccl2,Ccl5,Ccl6,Ccl7,Ccl8,Ccl9,Cxcl12,Syk,Rpl13a,Vav1,Ccl19,Ccl24,Pf4,Cxcl16,Slamf9,Itga9,Nckap1l,Ffar2,Ppia,Prex1,Gpr183
10_Member	GO Biological Processes	GO:0097529	myeloid leukocyte migration	-14.8489	-12.6714	Bsg,C5ar1,Ccr2,Cnn2,Csf1,Dpep1,Ednrb,Emp2,Fcer1g,Fcgr3,Flt1,Cxcl1,Itgam,Itgb2,Lgals3,Anxa1,Kitl,Mmp2,Myo1f,Ninj1,Pde4b,Pdgfb,Pecam1,Ppib,Ptpro,Rps19,S100a8,Ccl11,Ccl2,Ccl5,Ccl6,Ccl7,Ccl8,Ccl9,Syk,Rpl13a,Vav1,Ccl19,Ror2,Ccl24,Pf4,Selenok,Itga9,Nckap1l,Abr,Ppia,Prex1
10_Member	GO Biological Processes	GO:0060326	cell chemotaxis	-13.6481	-11.5111	Agtr1a,Bsg,C5ar1,Coro1a,Ccr2,Dpep1,S1pr1,Ednrb,Eng,Fcer1g,Fcgr3,Flt1,Lpar1,Cxcl1,Hbegf,Il16,Itgam,Itgb2,Lgals3,Lox,Anxa1,Mmp2,Ninj1,Pde4b,Pdgfb,Pdgfra,Plec,Ppib,Ptpro,Rps19,S100a8,Saa3,Ccl11,Ccl2,Ccl5,Ccl6,Ccl7,Ccl8,Ccl9,Cxcl12,Syk,Rpl13a,Vav1,Vcam1,Ccl19,Ccl24,Pf4,Cxcl14,Cxcl16,Slamf9,Itga9,Nckap1l,Ffar2,Ppia,Prex1,Gpr183
10_Member	GO Biological Processes	GO:0006935	chemotaxis	-12.4357	-10.3558	Agtr1a,Bsg,C3ar1,C5ar1,Coro1a,Ccr2,Ccr5,Ackr3,Creb3,Csf1r,Dpep1,Ear2,S1pr1,Ednrb,Efnb1,Efnb2,Enah,Eng,Etv1,Evl,Fcer1g,Fcgr3,Fes,Flot1,Flt1,Gas1,Gli3,Lpar1,Cxcl1,Hbegf,Igfals,Il16,Itgam,Itgb2,Lama2,Lgals3,Lox,Anxa1,Lsp1,Mef2c,Mmp2,Ninj1,Nrp2,Ntn1,Pde4b,Pdgfb,Pdgfra,Pik3cd,Pip5k1c,Plec,Ppib,Ptafr,Ptpro,Rac2,Rps19,S100a8,Saa3,Scn1b,Ccl11,Ccl2,Ccl5,Ccl6,Ccl7,Ccl8,Ccl9,Cxcl12,Sema4a,Sema6a,Slit2,Syk,T…
10_Member	GO Biological Processes	GO:0042330	taxis	-12.3275	-10.256	Agtr1a,Bsg,C3ar1,C5ar1,Coro1a,Ccr2,Ccr5,Ackr3,Creb3,Csf1r,Dpep1,Ear2,S1pr1,Ednrb,Efnb1,Efnb2,Enah,Eng,Etv1,Evl,Fcer1g,Fcgr3,Fes,Flot1,Flt1,Gas1,Gli3,Lpar1,Cxcl1,Hbegf,Igfals,Il16,Itgam,Itgb2,Lama2,Lgals3,Lox,Anxa1,Lsp1,Mef2c,Mmp2,Ninj1,Nrp2,Ntn1,Pde4b,Pdgfb,Pdgfra,Pik3cd,Pip5k1c,Plec,Ppib,Ptafr,Ptpro,Rac2,Rps19,S100a8,Saa3,Scn1b,Ccl11,Ccl2,Ccl5,Ccl6,Ccl7,Ccl8,Ccl9,Cxcl12,Sema4a,Sema6a,Slit2,Syk,T…
10_Member	GO Biological Processes	GO:0040011	locomotion	-11.8401	-9.79014	Agtr1a,Bsg,C3ar1,C5ar1,Coro1a,Ccr2,Ccr5,Ackr3,Creb3,Csf1r,Dpep1,Ear2,S1pr1,Ednrb,Efnb1,Efnb2,Enah,Eng,Etv1,Evl,Fcer1g,Fcgr3,Fes,Flot1,Flt1,Gas1,Gli3,Lpar1,Cxcl1,Hbegf,Igfals,Il16,Itgam,Itgb2,Lama2,Lgals3,Lox,Anxa1,Lsp1,Mef2c,Mmp2,Ninj1,Nrp2,Ntn1,Pde4b,Pdgfb,Pdgfra,Pik3cd,Pip5k1c,Plec,Ppib,Ptafr,Ptpro,Rac2,Rps19,S100a8,Saa3,Scn1b,Ccl11,Ccl2,Ccl5,Ccl6,Ccl7,Ccl8,Ccl9,Cxcl12,Sema4a,Sema6a,Slit2,Syk,T…
10_Member	GO Biological Processes	GO:1990266	neutrophil migration	-10.9434	-8.94548	Bsg,C5ar1,Dpep1,Emp2,Fcer1g,Fcgr3,Cxcl1,Itgam,Itgb2,Lgals3,Myo1f,Pde4b,Pecam1,Ppib,S100a8,Ccl11,Ccl2,Ccl5,Ccl6,Ccl7,Ccl8,Ccl9,Syk,Vav1,Ccl19,Ccl24,Pf4,Selenok,Itga9,Nckap1l,Ppia,Prex1
10_Member	GO Biological Processes	GO:0030593	neutrophil chemotaxis	-10.2128	-8.26758	Bsg,C5ar1,Dpep1,Fcer1g,Fcgr3,Cxcl1,Itgam,Itgb2,Lgals3,Pde4b,Ppib,S100a8,Ccl11,Ccl2,Ccl5,Ccl6,Ccl7,Ccl8,Ccl9,Syk,Vav1,Ccl19,Ccl24,Pf4,Itga9,Nckap1l,Ppia,Prex1
10_Member	GO Biological Processes	GO:0097530	granulocyte migration	-10.1436	-8.20252	Bsg,C5ar1,Dpep1,Emp2,Fcer1g,Fcgr3,Cxcl1,Itgam,Itgb2,Lgals3,Anxa1,Myo1f,Pde4b,Pecam1,Ppib,S100a8,Ccl11,Ccl2,Ccl5,Ccl6,Ccl7,Ccl8,Ccl9,Syk,Vav1,Ccl19,Ccl24,Pf4,Selenok,Itga9,Nckap1l,Ppia,Prex1
10_Member	GO Biological Processes	GO:0071621	granulocyte chemotaxis	-9.9043	-7.9852	Bsg,C5ar1,Dpep1,Fcer1g,Fcgr3,Cxcl1,Itgam,Itgb2,Lgals3,Anxa1,Pde4b,Ppib,S100a8,Ccl11,Ccl2,Ccl5,Ccl6,Ccl7,Ccl8,Ccl9,Syk,Vav1,Ccl19,Ccl24,Pf4,Itga9,Nckap1l,Ppia,Prex1
10_Member	GO Biological Processes	GO:0071674	mononuclear cell migration	-9.54742	-7.65292	Cdc42,Coro1a,Ccr2,S1pr1,Eps8,Flt1,Itga4,Itgal,F11r,Lgals3,Anxa1,Pdgfb,Pecam1,Plec,Ptpro,Rps19,Ccl11,Ccl2,Ccl5,Ccl6,Ccl7,Ccl8,Ccl9,Cxcl12,Ccl19,Ccl24,Cxcl16,Selenok,Slamf9,Myo1g,Gpr183
10_Member	GO Biological Processes	GO:0002548	monocyte chemotaxis	-8.14343	-6.35746	Ccr2,Flt1,Lgals3,Anxa1,Pdgfb,Ptpro,Rps19,Ccl11,Ccl2,Ccl5,Ccl6,Ccl7,Ccl8,Ccl9,Ccl19,Ccl24
10_Member	KEGG Pathway	mmu04062	Chemokine signaling pathway - Mus musculus (house mouse)	-7.87662	-6.11164	Adcy7,Bad,Cdc42,Ccr2,Ccr5,Fgr,Gnai2,Gnb2,Gng10,Gng2,Gng5,Gngt2,Cxcl1,Hras,Lyn,Ncf1,Nfkbia,Pak1,Pik3cd,Prkcb,Rac2,Rasgrp2,Ccl11,Ccl2,Ccl5,Ccl6,Ccl7,Ccl8,Ccl9,Cxcl12,Vav1,Akt3,Ccl19,Ccl24,Pf4,Cxcl14,Gng11,Cxcl16,Dock2,Pik3r6,Elmo1,Plcg2,Prex1,Pik3r5
10_Member	WikiPathways	WP2292	Chemokine signaling pathway	-7.11892	-5.40544	Adcy7,Cdc42,Ccr2,Ccr5,Fgr,Gnai2,Gng10,Gng2,Gng5,Gngt2,Cxcl1,Hras,Lyn,Ncf1,Nfkbia,Pak1,Pik3cd,Prkcb,Rac2,Rasgrp2,Ccl11,Ccl2,Ccl5,Ccl6,Ccl7,Ccl8,Ccl9,Cxcl12,Vav1,Akt3,Ccl19,Ccl24,Pf4,Cxcl14,Gng11,Cxcl16,Dock2,Elmo1,Prex1,Pik3r5
10_Member	GO Biological Processes	GO:0072678	T cell migration	-6.9326	-5.2334	Coro1a,Ccr2,S1pr1,Itga4,Itgal,F11r,Plec,Ccl2,Ccl5,Cxcl12,Cxcl16,Selenok,Myo1g,Gpr183
10_Member	GO Biological Processes	GO:0019221	cytokine-mediated signaling pathway	-6.86725	-5.17733	Bad,Cebpa,Ccr2,Ackr3,Crlf1,Csf1,Csf1r,Csf2rb,Egr1,Fcer1g,Lilrb4b,Lilrb4a,Cxcl1,Ptpn6,Ifnar2,Cd74,Il16,Il2ra,Il3ra,Il4ra,Il7r,Lep,Sh2b3,Lyn,Myd88,Nfkbia,Numbl,Pdgfb,Pirb,Ccl11,Ccl2,Ccl5,Ccl6,Ccl7,Ccl8,Ccl9,Cxcl12,Spi1,Syk,Tnfrsf11a,Tnfrsf1a,Traf4,Klf6,Oasl2,Cib1,Ccl19,Tnfsf13b,Irf5,Txndc17,Ccl24,Pf4,Crlf2,Iigp1,Ifitm3,Pycard,Rraga,Ifitm2,Trem2,Il31ra,St18,Aim2
10_Member	GO Biological Processes	GO:0072676	lymphocyte migration	-6.1972	-4.59161	Coro1a,Ccr2,S1pr1,Itga4,Itgal,F11r,Plec,Ccl11,Ccl2,Ccl5,Ccl6,Ccl7,Ccl8,Ccl9,Cxcl12,Ccl19,Ccl24,Cxcl16,Selenok,Myo1g,Gpr183
10_Member	GO Biological Processes	GO:1990868	response to chemokine	-5.75079	-4.19232	Ccr2,Ackr3,Cxcl1,Sh2b3,Lox,Lyn,Dusp1,Ccl11,Ccl2,Ccl5,Ccl6,Ccl7,Ccl8,Ccl9,Cxcl12,Cib1,Ccl19,Ccl24,Pf4,Trem2,Ripor2
10_Member	GO Biological Processes	GO:1990869	cellular response to chemokine	-5.75079	-4.19232	Ccr2,Ackr3,Cxcl1,Sh2b3,Lox,Lyn,Dusp1,Ccl11,Ccl2,Ccl5,Ccl6,Ccl7,Ccl8,Ccl9,Cxcl12,Cib1,Ccl19,Ccl24,Pf4,Trem2,Ripor2
10_Member	GO Biological Processes	GO:0048247	lymphocyte chemotaxis	-4.97409	-3.49978	Ccr2,Plec,Ccl11,Ccl2,Ccl5,Ccl6,Ccl7,Ccl8,Ccl9,Cxcl12,Ccl19,Ccl24,Cxcl16,Gpr183
10_Member	GO Biological Processes	GO:0070098	chemokine-mediated signaling pathway	-4.97322	-3.49961	Ccr2,Ackr3,Cxcl1,Sh2b3,Lyn,Ccl11,Ccl2,Ccl5,Ccl6,Ccl7,Ccl8,Ccl9,Cxcl12,Cib1,Ccl19,Ccl24,Pf4,Trem2
10_Member	KEGG Pathway	mmu04061	Viral protein interaction with cytokine and cytokine receptor - Mus musculus (house mouse)	-4.84502	-3.38986	Ccr2,Ccr5,Ackr3,Csf1,Csf1r,Cxcl1,Il10ra,Il2ra,Ltbr,Ccl11,Ccl2,Ccl5,Ccl6,Ccl7,Ccl8,Ccl9,Cxcl12,Tnfrsf1a,Tnfrsf1b,Ccl19,Ccl24,Pf4,Cxcl14
10_Member	GO Biological Processes	GO:0070555	response to interleukin-1	-4.73227	-3.28964	Cebpb,Cfl1,Egr1,Fn1,Tle5,Hyal2,Anxa1,Myd88,Saa3,Ccl11,Ccl2,Ccl5,Ccl6,Ccl7,Ccl8,Ccl9,Smpd1,Tnfrsf11a,Ccl19,Ccl24,Pycard,St18
10_Member	GO Biological Processes	GO:0048245	eosinophil chemotaxis	-4.48648	-3.06787	Lgals3,Ccl11,Ccl2,Ccl5,Ccl6,Ccl7,Ccl8,Ccl9,Ccl24
10_Member	GO Biological Processes	GO:0072677	eosinophil migration	-4.28075	-2.88608	Lgals3,Ccl11,Ccl2,Ccl5,Ccl6,Ccl7,Ccl8,Ccl9,Ccl24
10_Member	GO Biological Processes	GO:0071347	cellular response to interleukin-1	-3.87391	-2.54301	Cebpb,Cfl1,Egr1,Fn1,Hyal2,Myd88,Saa3,Ccl11,Ccl2,Ccl5,Ccl6,Ccl7,Ccl8,Ccl9,Ccl19,Ccl24,Pycard,St18
10_Member	KEGG Pathway	mmu04060	Cytokine-cytokine receptor interaction - Mus musculus (house mouse)	-3.3034	-2.05553	Bmp6,Ccr2,Ccr5,Ackr3,Csf1,Csf1r,Csf2rb,Cxcl1,Ifnar2,Il10ra,Il16,Il2ra,Il3ra,Il4ra,Il7r,Lep,Ltbr,Ngf,Ccl11,Ccl2,Ccl5,Ccl6,Ccl7,Ccl8,Ccl9,Cxcl12,Tgfb1,Tgfb2,Tnfrsf11a,Tnfrsf1a,Tnfrsf1b,Tnfsf12,Ccl19,Tnfsf13b,Tnfrsf12a,Ccl24,Pf4,Cxcl14,Crlf2,Cxcl16,Tnfrsf25,Tnfrsf21,Il1rl2,Il31ra,Il17d
11_Summary	GO Biological Processes	GO:0002683	negative regulation of immune system process	-18.7898	-16.42	Acp5,Adipoq,Adora1,Gfer,Btk,Serping1,C1qc,Ctnnb1,Runx1,Cd37,Cd44,Cd59a,Cd68,Cd84,Cd86,Cdk6,Cebpa,Cebpb,Ccr2,Cnn2,Col3a1,Cd55,Dpp4,Fbn1,Fcer1g,Fcgr2b,Fgl2,Fgr,Fn1,Gli3,Lilrb4b,Lilrb4a,Gpx1,Grn,H2-Aa,Ptpn6,Hfe,Hmox1,Hspb1,Id2,Ifi203,Ifi204,Cd74,Il2ra,Il4ra,Il7r,Inpp5d,Irf4,Mafb,Laptm5,Lgals3,Anxa1,Lst1,Lyn,Kitl,Mif,Cd200,Nbl1,Nme1,Nme2,Pirb,Prnp,Psmb4,Ptger4,Dusp1,Ptpn22,Ptprc,Rps19,Trim30a,Ccl2,Cx…
11_Member	GO Biological Processes	GO:0002683	negative regulation of immune system process	-18.7898	-16.42	Acp5,Adipoq,Adora1,Gfer,Btk,Serping1,C1qc,Ctnnb1,Runx1,Cd37,Cd44,Cd59a,Cd68,Cd84,Cd86,Cdk6,Cebpa,Cebpb,Ccr2,Cnn2,Col3a1,Cd55,Dpp4,Fbn1,Fcer1g,Fcgr2b,Fgl2,Fgr,Fn1,Gli3,Lilrb4b,Lilrb4a,Gpx1,Grn,H2-Aa,Ptpn6,Hfe,Hmox1,Hspb1,Id2,Ifi203,Ifi204,Cd74,Il2ra,Il4ra,Il7r,Inpp5d,Irf4,Mafb,Laptm5,Lgals3,Anxa1,Lst1,Lyn,Kitl,Mif,Cd200,Nbl1,Nme1,Nme2,Pirb,Prnp,Psmb4,Ptger4,Dusp1,Ptpn22,Ptprc,Rps19,Trim30a,Ccl2,Cx…
11_Member	GO Biological Processes	GO:0050866	negative regulation of cell activation	-15.3571	-13.1542	Apoe,Btk,Runx1,Cd37,Cd44,Cd84,Cd86,Cd9,Cebpb,Ccr2,Fcgr2b,Fgl2,Fgr,Fn1,Gli3,Lilrb4b,Lilrb4a,Grn,H2-Aa,Ptpn6,Hfe,Hmox1,Hspb1,Id2,Cd74,Il2ra,Il4ra,Inpp5d,Laptm5,Lgals3,Sh2b3,Anxa1,Lst1,Lyn,Cd200,Pdgfb,Pdgfra,Prkg1,Prnp,Ptpn22,Spi1,Sfrp1,Sdc4,Prdx2,Tgfb1,Tsc2,Tyrobp,Axl,Twsg1,Samsn1,Dusp3,Ubash3b,Rian,Trem2,Gpnmb,Tnfrsf21,Nckap1l,Abr,Cygb,Ripor2,Cd300a,Adgrf5,Bank1,Ildr2
11_Member	GO Biological Processes	GO:0002695	negative regulation of leukocyte activation	-11.8277	-9.78296	Btk,Runx1,Cd37,Cd44,Cd84,Cd86,Cebpb,Ccr2,Fcgr2b,Fgl2,Fgr,Fn1,Gli3,Lilrb4b,Lilrb4a,Grn,H2-Aa,Ptpn6,Hfe,Hmox1,Hspb1,Id2,Cd74,Il2ra,Il4ra,Inpp5d,Laptm5,Lgals3,Anxa1,Lst1,Lyn,Cd200,Prnp,Ptpn22,Spi1,Sfrp1,Sdc4,Prdx2,Tgfb1,Tsc2,Tyrobp,Axl,Twsg1,Samsn1,Dusp3,Gpnmb,Tnfrsf21,Nckap1l,Abr,Ripor2,Cd300a,Adgrf5,Bank1,Ildr2
11_Member	GO Biological Processes	GO:0007162	negative regulation of cell adhesion	-11.6419	-9.62251	Acp5,Adipoq,Arhgap6,Atp5b,Bmp6,Runx1,Cd37,Cd44,Cd86,Cd9,Cdh13,Cebpb,Cfl1,Col1a1,Cyp1b1,Fgl2,Gli3,Lilrb4b,Lilrb4a,Gstp1,H2-Aa,Ptpn6,Hfe,Hspb1,Hspg2,Cd74,Il2ra,Il4ra,Klf4,Laptm5,Lgals1,Lgals3,Sh2b3,Anxa1,Mmp14,Mmp2,Myo1f,Prkg1,Prnp,Dusp1,Ptpn22,Ptprc,Cxcl12,Sema6a,Spi1,Sdc4,Prdx2,Tgfb1,Thbs1,Tnc,Tsc2,Podxl,Postn,Myadm,Plxnc1,Twsg1,Jam2,Plxnd1,Dusp3,Ubash3b,Gpnmb,Tnfrsf21,Nckap1l,Plxnb2,Ripor2,Phldb…
11_Member	GO Biological Processes	GO:0051250	negative regulation of lymphocyte activation	-9.74918	-7.83971	Btk,Runx1,Cd37,Cd44,Cd86,Cebpb,Fcgr2b,Fgl2,Fgr,Gli3,Lilrb4b,Lilrb4a,H2-Aa,Ptpn6,Hfe,Hspb1,Id2,Cd74,Il2ra,Il4ra,Inpp5d,Laptm5,Lgals3,Anxa1,Lst1,Lyn,Prnp,Ptpn22,Sfrp1,Sdc4,Prdx2,Tgfb1,Tsc2,Tyrobp,Axl,Twsg1,Samsn1,Dusp3,Gpnmb,Tnfrsf21,Nckap1l,Ripor2,Cd300a,Bank1,Ildr2
11_Member	GO Biological Processes	GO:0022408	negative regulation of cell-cell adhesion	-7.88062	-6.11427	Adipoq,Bmp6,Runx1,Cd37,Cd44,Cd86,Cd9,Cebpb,Fgl2,Gli3,Lilrb4b,Lilrb4a,Gstp1,H2-Aa,Ptpn6,Hfe,Hspb1,Cd74,Il2ra,Il4ra,Klf4,Laptm5,Lgals3,Sh2b3,Anxa1,Prkg1,Prnp,Ptpn22,Cxcl12,Spi1,Sdc4,Prdx2,Tgfb1,Tsc2,Podxl,Myadm,Twsg1,Dusp3,Ubash3b,Gpnmb,Tnfrsf21,Nckap1l,Ripor2,Cd300a,Zfp703,Cdsn,Ildr2
11_Member	GO Biological Processes	GO:1903038	negative regulation of leukocyte cell-cell adhesion	-6.94992	-5.24954	Runx1,Cd37,Cd44,Cd86,Cebpb,Fgl2,Gli3,Lilrb4b,Lilrb4a,Gstp1,H2-Aa,Ptpn6,Hfe,Hspb1,Cd74,Il2ra,Il4ra,Klf4,Laptm5,Lgals3,Anxa1,Prnp,Ptpn22,Cxcl12,Sdc4,Prdx2,Tgfb1,Tsc2,Twsg1,Dusp3,Gpnmb,Tnfrsf21,Nckap1l,Ripor2,Cd300a,Ildr2
11_Member	GO Biological Processes	GO:0050868	negative regulation of T cell activation	-6.60968	-4.95294	Runx1,Cd37,Cd44,Cd86,Cebpb,Fgl2,Gli3,Lilrb4b,Lilrb4a,H2-Aa,Ptpn6,Hfe,Hspb1,Cd74,Il2ra,Il4ra,Laptm5,Lgals3,Anxa1,Prnp,Ptpn22,Sdc4,Prdx2,Tgfb1,Tsc2,Twsg1,Dusp3,Gpnmb,Tnfrsf21,Nckap1l,Ripor2,Cd300a,Ildr2
11_Member	GO Biological Processes	GO:0050672	negative regulation of lymphocyte proliferation	-5.82883	-4.26299	Btk,Cd37,Cd44,Cd86,Cebpb,Fcgr2b,Lilrb4b,Lilrb4a,H2-Aa,Ptpn6,Il2ra,Inpp5d,Laptm5,Lst1,Lyn,Prnp,Sdc4,Tgfb1,Tsc2,Tyrobp,Twsg1,Gpnmb,Tnfrsf21,Ripor2,Cd300a
11_Member	GO Biological Processes	GO:0032945	negative regulation of mononuclear cell proliferation	-5.73907	-4.18516	Btk,Cd37,Cd44,Cd86,Cebpb,Fcgr2b,Lilrb4b,Lilrb4a,H2-Aa,Ptpn6,Il2ra,Inpp5d,Laptm5,Lst1,Lyn,Prnp,Sdc4,Tgfb1,Tsc2,Tyrobp,Twsg1,Gpnmb,Tnfrsf21,Ripor2,Cd300a
11_Member	GO Biological Processes	GO:0070664	negative regulation of leukocyte proliferation	-5.67179	-4.12372	Btk,Cd37,Cd44,Cd86,Cebpb,Fcgr2b,Lilrb4b,Lilrb4a,Gstp1,H2-Aa,Ptpn6,Il2ra,Inpp5d,Laptm5,Lst1,Lyn,Prnp,Sdc4,Tgfb1,Tsc2,Tyrobp,Twsg1,Gpnmb,Tnfrsf21,Ripor2,Cd300a
11_Member	GO Biological Processes	GO:0042130	negative regulation of T cell proliferation	-3.42798	-2.16274	Cd37,Cd44,Cd86,Cebpb,Lilrb4b,Lilrb4a,H2-Aa,Ptpn6,Il2ra,Laptm5,Prnp,Sdc4,Tgfb1,Tsc2,Twsg1,Gpnmb,Tnfrsf21,Ripor2
12_Summary	GO Biological Processes	GO:0010942	positive regulation of cell death	-18.3629	-16.0146	Ace,Adipoq,Adm,Adora1,Agt,Anxa5,Apoe,Rhob,Atf3,Bad,Bax,Tspo,C1qa,C3,Ctnnb1,Cd44,Cdc42,Cdkn1a,Clu,Col18a1,Ctsc,Ctsd,Ctsh,Ctsk,Ctsl,Ctss,Cyp1b1,Degs1,Efnb2,Egr1,Fcgr2b,Fosl1,Fyn,G0s2,Rack1,Lpar1,Tle5,Grn,Pdia3,Hmox1,Hp,Hspd1,Hyal2,Irf8,Igfbp3,Inpp5d,Itga4,Itgam,Itgb1,Laptm5,Lcn2,Ldha,Lep,Lgals1,Anxa1,Ltbr,Lyn,Mef2c,Mmp2,Sik1,Gadd45b,Ncf2,Nos3,Ddr2,Pea15a,Phb,Pik3cd,Pla2g4a,Ppp1ca,Prnp,Ptgis,Dusp1,P…
12_Member	GO Biological Processes	GO:0010942	positive regulation of cell death	-18.3629	-16.0146	Ace,Adipoq,Adm,Adora1,Agt,Anxa5,Apoe,Rhob,Atf3,Bad,Bax,Tspo,C1qa,C3,Ctnnb1,Cd44,Cdc42,Cdkn1a,Clu,Col18a1,Ctsc,Ctsd,Ctsh,Ctsk,Ctsl,Ctss,Cyp1b1,Degs1,Efnb2,Egr1,Fcgr2b,Fosl1,Fyn,G0s2,Rack1,Lpar1,Tle5,Grn,Pdia3,Hmox1,Hp,Hspd1,Hyal2,Irf8,Igfbp3,Inpp5d,Itga4,Itgam,Itgb1,Laptm5,Lcn2,Ldha,Lep,Lgals1,Anxa1,Ltbr,Lyn,Mef2c,Mmp2,Sik1,Gadd45b,Ncf2,Nos3,Ddr2,Pea15a,Phb,Pik3cd,Pla2g4a,Ppp1ca,Prnp,Ptgis,Dusp1,P…
12_Member	GO Biological Processes	GO:0043068	positive regulation of programmed cell death	-16.6389	-14.3628	Ace,Adipoq,Adm,Agt,Anxa5,Rhob,Atf3,Bad,Bax,Tspo,C3,Ctnnb1,Cd44,Cdc42,Cdkn1a,Clu,Col18a1,Ctsc,Ctsd,Ctsh,Ctsk,Ctsl,Ctss,Cyp1b1,Degs1,Egr1,Fosl1,G0s2,Rack1,Lpar1,Tle5,Grn,Pdia3,Hmox1,Hspd1,Hyal2,Irf8,Igfbp3,Inpp5d,Itga4,Itgam,Itgb1,Laptm5,Lcn2,Ldha,Lep,Lgals1,Anxa1,Ltbr,Lyn,Mef2c,Mmp2,Sik1,Gadd45b,Ncf2,Nos3,Pea15a,Pik3cd,Pla2g4a,Ppp1ca,Prnp,Ptgis,Dusp1,Ptprc,Rpl26,Rps6,Rps7,S100a8,S100b,Sap18,Scp2,C…
12_Member	GO Biological Processes	GO:0043065	positive regulation of apoptotic process	-16.134	-13.8794	Ace,Adipoq,Adm,Agt,Anxa5,Rhob,Atf3,Bad,Bax,Tspo,C3,Ctnnb1,Cd44,Cdc42,Clu,Col18a1,Ctsc,Ctsd,Ctsh,Ctsk,Ctsl,Ctss,Cyp1b1,Degs1,Egr1,Fosl1,G0s2,Rack1,Lpar1,Tle5,Grn,Pdia3,Hmox1,Hspd1,Hyal2,Irf8,Igfbp3,Inpp5d,Itga4,Itgam,Itgb1,Lcn2,Ldha,Lep,Lgals1,Anxa1,Ltbr,Lyn,Mef2c,Mmp2,Sik1,Gadd45b,Ncf2,Nos3,Pea15a,Pik3cd,Pla2g4a,Ppp1ca,Prnp,Ptgis,Dusp1,Ptprc,Rpl26,Rps6,Rps7,S100a8,S100b,Sap18,Scp2,Ccl2,Ccl5,Sfrp2…
13_Summary	KEGG Pathway	mmu04145	Phagosome - Mus musculus (house mouse)	-18.3277	-15.9846	Actb,Actg1,Atp6v1e1,Atp6v0e,Atp6v0c,C3,Calr,Canx,Cd14,Cd36,Coro1a,Ctsl,Ctss,Cyba,Cybb,Fcgr1,Fcgr2b,Fcgr3,H2-Aa,H2-Ab1,H2-D1,H2-Eb1,H2-K1,H2-DMb1,H2-Q4,H2-Q7,H2-T23,Itga5,Itgam,Itgb1,Itgb2,Lamp1,Mrc1,Ncf1,Ncf2,Rab5c,Msr1,Sec61g,Thbs1,Thbs2,Thbs3,Tuba1a,Tuba1b,Tuba1c,Tubb2a,Tubb5,Vamp3,C1ra,Sec61a1,Atp6v1f,Sec61b,Atp6v1g1,Tubb6,Cd209f,Cd209g,H2-Q6,Atp6v0b,Rab7b,Tubb4b,Atp6v0d2
13_Member	KEGG Pathway	mmu04145	Phagosome - Mus musculus (house mouse)	-18.3277	-15.9846	Actb,Actg1,Atp6v1e1,Atp6v0e,Atp6v0c,C3,Calr,Canx,Cd14,Cd36,Coro1a,Ctsl,Ctss,Cyba,Cybb,Fcgr1,Fcgr2b,Fcgr3,H2-Aa,H2-Ab1,H2-D1,H2-Eb1,H2-K1,H2-DMb1,H2-Q4,H2-Q7,H2-T23,Itga5,Itgam,Itgb1,Itgb2,Lamp1,Mrc1,Ncf1,Ncf2,Rab5c,Msr1,Sec61g,Thbs1,Thbs2,Thbs3,Tuba1a,Tuba1b,Tuba1c,Tubb2a,Tubb5,Vamp3,C1ra,Sec61a1,Atp6v1f,Sec61b,Atp6v1g1,Tubb6,Cd209f,Cd209g,H2-Q6,Atp6v0b,Rab7b,Tubb4b,Atp6v0d2
14_Summary	Reactome Gene Sets	R-MMU-1280218	Adaptive Immune System	-18.0532	-15.7253	Ap2m1,Arf1,B2m,Btk,C3,Calm1,Calm3,Calr,Canx,Capza2,Cd34,Cd36,Cd81,Cd86,Cdc42,Socs3,Col3a1,Col1a1,Col1a2,Ctsb,Ctsc,Ctsd,Ctsh,Ctsk,Ctsl,Ctss,Cyba,Cybb,Dnm1,Fcgr1,Fcgr2b,Fyn,Pdia3,Hspa5,H2-K1,H2-Q4,H2-Q7,H2-T23,Ptpn6,Hras,Cd74,Inpp5d,Itga4,Itgal,Itgb1,Itgb2,Lcp2,Psmb8,Blnk,Lyn,Mrc1,Ncf1,Ncf2,Nfatc2,Nfkbia,Pik3cd,Pja1,Prkcb,Ctsa,Prkg1,Lgmn,Psma2,Psmb10,Psmb4,Psmb5,Psmb6,Psmc2,Psmc3,Psme2,Ptpn22,Ptprc…
14_Member	Reactome Gene Sets	R-MMU-1280218	Adaptive Immune System	-18.0532	-15.7253	Ap2m1,Arf1,B2m,Btk,C3,Calm1,Calm3,Calr,Canx,Capza2,Cd34,Cd36,Cd81,Cd86,Cdc42,Socs3,Col3a1,Col1a1,Col1a2,Ctsb,Ctsc,Ctsd,Ctsh,Ctsk,Ctsl,Ctss,Cyba,Cybb,Dnm1,Fcgr1,Fcgr2b,Fyn,Pdia3,Hspa5,H2-K1,H2-Q4,H2-Q7,H2-T23,Ptpn6,Hras,Cd74,Inpp5d,Itga4,Itgal,Itgb1,Itgb2,Lcp2,Psmb8,Blnk,Lyn,Mrc1,Ncf1,Ncf2,Nfatc2,Nfkbia,Pik3cd,Pja1,Prkcb,Ctsa,Prkg1,Lgmn,Psma2,Psmb10,Psmb4,Psmb5,Psmb6,Psmc2,Psmc3,Psme2,Ptpn22,Ptprc…
14_Member	Reactome Gene Sets	R-MMU-198933	Immunoregulatory interactions between a Lymphoid and a non-Lymphoid cell	-6.39461	-4.7637	B2m,C3,Cd34,Cd81,Col3a1,Col1a1,Col1a2,Fcgr2b,H2-K1,H2-Q4,H2-Q7,H2-T23,Itga4,Itgal,Itgb1,Itgb2,Cd300lg,Lair1,Ifitm3,Slamf7,Ifitm2,Trem2,H2-Q6,Cd300c2,Cd300a,Cd300lb
15_Summary	GO Biological Processes	GO:0032103	positive regulation of response to external stimulus	-17.6527	-15.3347	Ace,Aif1,Alox5ap,Fabp4,Bmp6,Btk,C3,C3ar1,C5ar1,Calr,Cd14,Cd81,Cd86,Cdh13,Cebpa,Cebpb,Ccr2,Ccr5,Creb3,Csf1,Csf1r,Ctsc,Ctss,Cyba,Ddt,Dpp4,S1pr1,Fbn1,Fcer1g,Fcgr1,Fcgr3,Fem1a,Flot1,Fn1,Lpar1,Grn,Cxcl1,Hspb1,Hspd1,Hsp90aa1,Hyal2,Ifi203,Ifi204,Cd74,Il16,Kdr,Lamp1,Lgals1,Lpl,Cd180,Ly86,Lyn,Mif,Myd88,Nfkbia,Ninj1,Pdgfb,Phb,Pla2g4a,Plat,Lgmn,Ptger4,Ptpn22,Rac2,Rab34,Rps19,Trim30a,S100a8,Ccl2,Ccl5,Ccl7,Cx…
15_Member	GO Biological Processes	GO:0032103	positive regulation of response to external stimulus	-17.6527	-15.3347	Ace,Aif1,Alox5ap,Fabp4,Bmp6,Btk,C3,C3ar1,C5ar1,Calr,Cd14,Cd81,Cd86,Cdh13,Cebpa,Cebpb,Ccr2,Ccr5,Creb3,Csf1,Csf1r,Ctsc,Ctss,Cyba,Ddt,Dpp4,S1pr1,Fbn1,Fcer1g,Fcgr1,Fcgr3,Fem1a,Flot1,Fn1,Lpar1,Grn,Cxcl1,Hspb1,Hspd1,Hsp90aa1,Hyal2,Ifi203,Ifi204,Cd74,Il16,Kdr,Lamp1,Lgals1,Lpl,Cd180,Ly86,Lyn,Mif,Myd88,Nfkbia,Ninj1,Pdgfb,Phb,Pla2g4a,Plat,Lgmn,Ptger4,Ptpn22,Rac2,Rab34,Rps19,Trim30a,S100a8,Ccl2,Ccl5,Ccl7,Cx…
15_Member	GO Biological Processes	GO:0031349	positive regulation of defense response	-12.1898	-10.1266	Ace,Alox5ap,Fabp4,Btk,C3,Cd14,Cd81,Cd86,Cebpa,Cebpb,Ccr2,Ccr5,Csf1r,Ctsc,Ctss,Cyba,Ddt,Dpp4,Fcer1g,Fcgr1,Fcgr3,Fem1a,Flot1,Gja1,Grn,Cxcl1,Hspd1,Hsp90aa1,Hyal2,Ifi203,Ifi204,Cd74,Il16,Lamp1,Lgals1,Lpl,Lyn,Mef2c,Myd88,Nfkbia,Ninj1,Phb,Pla2g4a,Ptger4,Ptpn22,Rab34,Rps19,Trim30a,S100a8,Ccl5,Spi1,Syk,Tgm2,Tnfrsf11a,Tnfrsf1a,Tyrobp,Vamp8,Vav1,Ets1,Naglu,Mfhas1,Ccl24,Nupr1,Park7,Slc15a3,Tmem126a,Pycard,T…
15_Member	GO Biological Processes	GO:0002831	regulation of response to biotic stimulus	-8.0178	-6.23854	Gfer,Apoe,Arf6,Bmp6,Serping1,C3,Cd14,Cd36,Cd37,Cd84,Cd86,Cfh,Creb3,Cyba,Cd55,Dpp4,Fgl2,Fgr,Flot1,Grn,Cxcl1,Hspd1,Hsp90aa1,Ifi203,Ifi204,Cd74,Irf4,Lamp1,Lep,Cd180,Ly86,Lyn,Mif,Myd88,Myo1f,Ncf1,Nfkbia,Ninj1,Phb,Ptpn22,Rab34,Rps19,Trim30a,Ccl5,Spi1,Serpinb9,Syk,Prdx2,Tgfb1,Otop1,Tyrobp,Vav1,Banf1,Naglu,Mfhas1,Htra1,Tspan6,Slc15a3,Tmem126a,Pycard,Tril,Nop53,Rtn4,Rftn1,Apobec3,Selenok,Trem2,Mapkapk3,P…
15_Member	GO Biological Processes	GO:0045088	regulation of innate immune response	-5.99899	-4.41822	Gfer,Apoe,Arf6,Serping1,C3,Cd14,Cd36,Cd86,Cfh,Cyba,Dpp4,Fgr,Flot1,Grn,Hspd1,Hsp90aa1,Ifi203,Ifi204,Cd74,Irf4,Lamp1,Lep,Lyn,Myd88,Myo1f,Ncf1,Nfkbia,Ninj1,Phb,Ptpn22,Rps19,Trim30a,Spi1,Serpinb9,Syk,Tgfb1,Otop1,Tyrobp,Vav1,Banf1,Naglu,Mfhas1,Tspan6,Slc15a3,Tmem126a,Pycard,Tril,Nop53,Rtn4,Rftn1,Trem2,Mapkapk3,Pik3r6,Tlr7,Trim25,Cd300a,Rab7b,Ifi207,Ifi205,Gbp5,Ffar2,Plcg2,Ifi211,Aim2,Tnip3,Nlrp1b,Isg1…
15_Member	GO Biological Processes	GO:0002833	positive regulation of response to biotic stimulus	-5.39923	-3.87846	Bmp6,Cd14,Cd86,Cyba,Dpp4,Flot1,Grn,Cxcl1,Hspd1,Hsp90aa1,Ifi203,Ifi204,Cd74,Lamp1,Cd180,Ly86,Lyn,Mif,Myd88,Nfkbia,Ninj1,Phb,Ptpn22,Rab34,Rps19,Trim30a,Spi1,Syk,Tyrobp,Vav1,Naglu,Mfhas1,Slc15a3,Tmem126a,Pycard,Tril,Rtn4,Rftn1,Mapkapk3,Mmrn2,Tlr7,Trim25,Ifi207,Ifi205,Gbp5,Ffar2,Plcg2,Emilin2,Ifi211,Aim2,Tnip3,Nlrp1b,Mndal
15_Member	GO Biological Processes	GO:0002218	activation of innate immune response	-4.26124	-2.87005	Cd14,Cd86,Hspd1,Hsp90aa1,Ifi203,Ifi204,Lyn,Myd88,Nfkbia,Phb,Trim30a,Syk,Tyrobp,Naglu,Tmem126a,Pycard,Tril,Rftn1,Mapkapk3,Tlr7,Trim25,Ifi207,Ifi205,Gbp5,Ffar2,Plcg2,Ifi211,Aim2,Tnip3,Nlrp1b,Mndal
15_Member	GO Biological Processes	GO:0045089	positive regulation of innate immune response	-3.7834	-2.46401	Cd14,Cd86,Cyba,Dpp4,Flot1,Hspd1,Hsp90aa1,Ifi203,Ifi204,Cd74,Lamp1,Lyn,Myd88,Nfkbia,Ninj1,Phb,Ptpn22,Rps19,Trim30a,Spi1,Syk,Tyrobp,Vav1,Naglu,Mfhas1,Slc15a3,Tmem126a,Pycard,Tril,Rtn4,Rftn1,Mapkapk3,Tlr7,Trim25,Ifi207,Ifi205,Gbp5,Ffar2,Plcg2,Ifi211,Aim2,Tnip3,Nlrp1b,Mndal
15_Member	GO Biological Processes	GO:0002758	innate immune response-activating signaling pathway	-2.9335	-1.76161	Cd14,Cd86,Hspd1,Lyn,Myd88,Nfkbia,Phb,Syk,Tyrobp,Naglu,Tmem126a,Pycard,Tril,Rftn1,Mapkapk3,Tlr7,Trim25,Ffar2,Plcg2,Aim2,Tnip3,Nlrp1b
15_Member	GO Biological Processes	GO:0002221	pattern recognition receptor signaling pathway	-2.73321	-1.59388	Cd14,Cd86,Hspd1,Lyn,Myd88,Nfkbia,Phb,Naglu,Tmem126a,Pycard,Tril,Rftn1,Mapkapk3,Tlr7,Trim25,Ffar2,Plcg2,Aim2,Tnip3,Nlrp1b
15_Member	GO Biological Processes	GO:0002220	innate immune response activating cell surface receptor signaling pathway	-2.69151	-1.56335	Cd14,Lyn,Myd88,Nfkbia,Syk,Tyrobp,Naglu,Tmem126a,Tril,Ffar2,Plcg2,Tnip3
15_Member	GO Biological Processes	GO:0034142	toll-like receptor 4 signaling pathway	-2.30617	-1.25756	Cd14,Lyn,Myd88,Nfkbia,Naglu,Tmem126a,Tril,Tnip3
15_Member	GO Biological Processes	GO:0140895	cell surface toll-like receptor signaling pathway	-2.12388	-1.11916	Cd14,Lyn,Myd88,Nfkbia,Naglu,Tmem126a,Tril,Tnip3
15_Member	GO Biological Processes	GO:0002752	cell surface pattern recognition receptor signaling pathway	-2.08696	-1.08743	Cd14,Lyn,Myd88,Nfkbia,Naglu,Tmem126a,Tril,Ffar2,Tnip3
16_Summary	GO Biological Processes	GO:1901342	regulation of vasculature development	-16.9973	-14.6984	Adm,Agt,Agtr1a,Anxa3,Aqp1,Rhob,C3,C3ar1,C5ar1,Ctnnb1,Runx1,Cd34,Cd59a,Cdh5,Cldn5,Ccr2,Ctsh,Cybb,Cyp1b1,Dcn,Ecm1,Emp2,Eng,Flt1,Grn,Hmox1,Hspb1,Id1,Itga5,Itgb1,Itgb2,Kdr,Klf2,Klf4,Lep,Lgals3,Sh2b3,Ninj1,Nos3,Pgk1,Pik3cd,Prkcb,Ptger4,Ptgis,Rras,S100a1,Ccl11,Ccl2,Ccl5,Serpinf1,Sfrp2,Sema4a,Sema6a,Sparc,Tek,Tgfb2,Thbs1,Thbs2,Tnfrsf1a,Akt3,Ets1,Fbln5,Creb3l1,Tnfrsf12a,Mydgf,Ramp2,Ccl24,Cysltr1,Smoc2,Pl…
16_Member	GO Biological Processes	GO:1901342	regulation of vasculature development	-16.9973	-14.6984	Adm,Agt,Agtr1a,Anxa3,Aqp1,Rhob,C3,C3ar1,C5ar1,Ctnnb1,Runx1,Cd34,Cd59a,Cdh5,Cldn5,Ccr2,Ctsh,Cybb,Cyp1b1,Dcn,Ecm1,Emp2,Eng,Flt1,Grn,Hmox1,Hspb1,Id1,Itga5,Itgb1,Itgb2,Kdr,Klf2,Klf4,Lep,Lgals3,Sh2b3,Ninj1,Nos3,Pgk1,Pik3cd,Prkcb,Ptger4,Ptgis,Rras,S100a1,Ccl11,Ccl2,Ccl5,Serpinf1,Sfrp2,Sema4a,Sema6a,Sparc,Tek,Tgfb2,Thbs1,Thbs2,Tnfrsf1a,Akt3,Ets1,Fbln5,Creb3l1,Tnfrsf12a,Mydgf,Ramp2,Ccl24,Cysltr1,Smoc2,Pl…
16_Member	GO Biological Processes	GO:0045765	regulation of angiogenesis	-16.8046	-14.5239	Adm,Agt,Agtr1a,Anxa3,Aqp1,Rhob,C3,C3ar1,C5ar1,Ctnnb1,Runx1,Cd34,Cd59a,Cdh5,Cldn5,Ccr2,Ctsh,Cybb,Cyp1b1,Dcn,Ecm1,Emp2,Eng,Flt1,Grn,Hmox1,Hspb1,Id1,Itga5,Itgb1,Itgb2,Kdr,Klf2,Klf4,Lep,Lgals3,Sh2b3,Ninj1,Nos3,Pgk1,Pik3cd,Prkcb,Ptgis,Rras,S100a1,Ccl11,Ccl2,Ccl5,Serpinf1,Sfrp2,Sema4a,Sema6a,Sparc,Tek,Tgfb2,Thbs1,Thbs2,Tnfrsf1a,Akt3,Ets1,Fbln5,Creb3l1,Tnfrsf12a,Mydgf,Ramp2,Ccl24,Cysltr1,Smoc2,Plxnd1,Rt…
16_Member	GO Biological Processes	GO:0045766	positive regulation of angiogenesis	-14.4566	-12.3032	Adm,Agtr1a,Anxa3,Aqp1,Rhob,C3,C3ar1,C5ar1,Runx1,Cd34,Cdh5,Ctsh,Cybb,Cyp1b1,Ecm1,Emp2,Eng,Flt1,Grn,Hmox1,Hspb1,Itga5,Itgb1,Itgb2,Kdr,Klf4,Lgals3,Ninj1,Nos3,Pik3cd,Prkcb,Ptgis,Rras,S100a1,Ccl11,Ccl5,Sfrp2,Tek,Thbs1,Tnfrsf1a,Akt3,Ets1,Mydgf,Ramp2,Ccl24,Cysltr1,Smoc2,Rtn4,Emc10,Lrg1,Pik3r6,Cela1,Jcad,Emilin2
16_Member	GO Biological Processes	GO:1904018	positive regulation of vasculature development	-14.4566	-12.3032	Adm,Agtr1a,Anxa3,Aqp1,Rhob,C3,C3ar1,C5ar1,Runx1,Cd34,Cdh5,Ctsh,Cybb,Cyp1b1,Ecm1,Emp2,Eng,Flt1,Grn,Hmox1,Hspb1,Itga5,Itgb1,Itgb2,Kdr,Klf4,Lgals3,Ninj1,Nos3,Pik3cd,Prkcb,Ptgis,Rras,S100a1,Ccl11,Ccl5,Sfrp2,Tek,Thbs1,Tnfrsf1a,Akt3,Ets1,Mydgf,Ramp2,Ccl24,Cysltr1,Smoc2,Rtn4,Emc10,Lrg1,Pik3r6,Cela1,Jcad,Emilin2
16_Member	GO Biological Processes	GO:0050678	regulation of epithelial cell proliferation	-8.00372	-6.22768	Agtr1a,Apoe,Atp5a1,Atpif1,B2m,Bad,Bax,Bmp6,Zfp36l1,Btk,C5ar1,Ctnnb1,Cav2,Ccnd1,Ccnd2,Cdc42,Cdh13,Cdk6,Col18a1,Ctsl,Cyba,Dab2,Ecm1,Ednrb,Efnb2,Eng,Flt1,Gas1,Gja1,Gpc3,Gpx1,Grn,Hes1,Hmox1,Hras,Hspg2,Id1,Itga4,Kdr,Lep,Mef2c,Nme1,Npm1,Pdgfb,Pik3cd,Rbpj,Ccl11,Ccl2,Ccl5,Cxcl12,Serpinf1,Sfrp2,Sfrp1,Sparc,Tek,Tgfb1,Tgfb2,Thbs1,Tsc2,Twist1,Akt3,Mydgf,Htra1,Ccl24,Nupr1,Rtn4,Emc10,Pold4,Rian,Lrg1,Maged1,Mmr…
16_Member	GO Biological Processes	GO:0001936	regulation of endothelial cell proliferation	-7.72849	-5.97296	Agtr1a,Apoe,Atp5a1,Atpif1,Bmp6,Cav2,Cdh13,Col18a1,Cyba,Ecm1,Eng,Flt1,Gja1,Hmox1,Hspg2,Itga4,Kdr,Lep,Mef2c,Pdgfb,Pik3cd,Ccl11,Ccl2,Cxcl12,Sparc,Tek,Thbs1,Tsc2,Akt3,Mydgf,Ccl24,Emc10,Pold4,Lrg1,Mmrn2,Ppp1r16b,Jcad,Egfl7
16_Member	GO Biological Processes	GO:0050679	positive regulation of epithelial cell proliferation	-5.61399	-4.07004	Agtr1a,Bad,Bmp6,Btk,C5ar1,Ctnnb1,Cav2,Ccnd1,Ccnd2,Cdc42,Cdh13,Col18a1,Cyba,Ecm1,Gas1,Grn,Hmox1,Hras,Hspg2,Id1,Itga4,Kdr,Nme1,Pdgfb,Pik3cd,Rbpj,Ccl11,Ccl2,Ccl5,Cxcl12,Sfrp1,Tgfb1,Twist1,Akt3,Mydgf,Htra1,Ccl24,Rtn4,Emc10,Pold4,Lrg1,Ppp1r16b,Jcad,Egfl7,Zfp703
16_Member	GO Biological Processes	GO:0001938	positive regulation of endothelial cell proliferation	-4.9959	-3.51948	Agtr1a,Bmp6,Cav2,Cdh13,Col18a1,Cyba,Ecm1,Hmox1,Hspg2,Itga4,Kdr,Pdgfb,Pik3cd,Ccl11,Ccl2,Cxcl12,Akt3,Mydgf,Ccl24,Emc10,Pold4,Lrg1,Ppp1r16b,Jcad,Egfl7
17_Summary	GO Biological Processes	GO:0006897	endocytosis	-16.9612	-14.6669	Adm,Aif1,Anxa3,Ap2m1,Apoe,Arf6,Atp5b,Canx,Cav2,Cd14,Cd36,Cd44,Cd81,Cd9,Cdc42,Coro1a,Clta,Ccr2,Ackr3,Cnn2,Dpysl2,Dab2,Dbnl,Dnm1,Ehd1,Fcer1g,Fcgr1,Fcgr2b,Fcgr3,Flot1,Lilrb4b,Lilrb4a,Grn,Hras,Hspg2,Irf8,Il10ra,Itga4,Itgal,Itgam,Itgb1,Itgb2,Lep,Anxa1,Mfge8,Mrc1,Myd88,Myo7a,Ncf2,Nme1,Slc11a1,Pecam1,Pip5k1c,Rab34,Msr1,Sncg,Syk,Syp,Tgm2,Thbs1,Tyrobp,Unc119,Vav1,Ezr,Vldlr,Axl,Abca7,Srpx,Ramp1,Rnasek,Ramp…
17_Member	GO Biological Processes	GO:0006897	endocytosis	-16.9612	-14.6669	Adm,Aif1,Anxa3,Ap2m1,Apoe,Arf6,Atp5b,Canx,Cav2,Cd14,Cd36,Cd44,Cd81,Cd9,Cdc42,Coro1a,Clta,Ccr2,Ackr3,Cnn2,Dpysl2,Dab2,Dbnl,Dnm1,Ehd1,Fcer1g,Fcgr1,Fcgr2b,Fcgr3,Flot1,Lilrb4b,Lilrb4a,Grn,Hras,Hspg2,Irf8,Il10ra,Itga4,Itgal,Itgam,Itgb1,Itgb2,Lep,Anxa1,Mfge8,Mrc1,Myd88,Myo7a,Ncf2,Nme1,Slc11a1,Pecam1,Pip5k1c,Rab34,Msr1,Sncg,Syk,Syp,Tgm2,Thbs1,Tyrobp,Unc119,Vav1,Ezr,Vldlr,Axl,Abca7,Srpx,Ramp1,Rnasek,Ramp…
17_Member	GO Biological Processes	GO:0006909	phagocytosis	-12.0321	-9.97573	Aif1,Anxa3,Cd36,Cdc42,Coro1a,Ccr2,Cnn2,Fcer1g,Fcgr1,Fcgr2b,Fcgr3,Irf8,Itgal,Itgam,Itgb1,Itgb2,Lep,Anxa1,Mfge8,Myd88,Myo7a,Ncf2,Slc11a1,Pecam1,Pip5k1c,Rab34,Msr1,Tgm2,Thbs1,Tyrobp,Vav1,Axl,Abca7,Srpx,Cd302,Tusc2,Trem2,Pld4,Abr,Elmo1,Rab7b,Gsn,Arhgap25,P2ry6,Myo1g
17_Member	GO Biological Processes	GO:0010324	membrane invagination	-4.8689	-3.40835	Aif1,Arf1,Cdc42,Fcer1g,Fcgr1,Fcgr2b,Fcgr3,Itgam,Itgb2,Msr1,Thbs1,Chmp2a,Trem2,Elmo1,Snx18,Fnbp1l,Gsn,Arhgap25
17_Member	GO Biological Processes	GO:0099024	plasma membrane invagination	-4.38354	-2.98065	Aif1,Arf1,Cdc42,Fcer1g,Fcgr1,Fcgr2b,Fcgr3,Itgam,Itgb2,Msr1,Thbs1,Trem2,Elmo1,Snx18,Gsn,Arhgap25
17_Member	GO Biological Processes	GO:0006911	phagocytosis, engulfment	-4.10752	-2.73829	Aif1,Cdc42,Fcer1g,Fcgr1,Fcgr2b,Fcgr3,Itgam,Itgb2,Msr1,Thbs1,Trem2,Elmo1,Gsn,Arhgap25
18_Summary	Reactome Gene Sets	R-MMU-5389840	Mitochondrial translation elongation	-16.4739	-14.2065	Mrps33,Mrpl23,Mrps12,Mrpl17,Mrps7,Mrpl12,Mrpl19,Mrps23,Mrps14,Mrps24,Mrpl54,Aurkaip1,Chchd1,Mrpl4,Mrps17,Mrps21,Mrpl20,Mrpl51,Mrpl33,Mrps18b,Mrpl55,Mrpl42,Mrpl18,Mrpl57,Mrpl14,Mrpl53,Mrps18a,Mrpl28,Mrps18c,Mrpl52,Mrps34,Mrpl27,Mrpl34,Mrpl36,Gadd45gip1,Mrpl41,Mrpl30,Ndufa7,Mrpl43,Lars2,Tufm,Cfh,Hsd17b10,Tbrg4
18_Member	Reactome Gene Sets	R-MMU-5389840	Mitochondrial translation elongation	-16.4739	-14.2065	Mrps33,Mrpl23,Mrps12,Mrpl17,Mrps7,Mrpl12,Mrpl19,Mrps23,Mrps14,Mrps24,Mrpl54,Aurkaip1,Chchd1,Mrpl4,Mrps17,Mrps21,Mrpl20,Mrpl51,Mrpl33,Mrps18b,Mrpl55,Mrpl42,Mrpl18,Mrpl57,Mrpl14,Mrpl53,Mrps18a,Mrpl28,Mrps18c,Mrpl52,Mrps34,Mrpl27,Mrpl34,Mrpl36,Gadd45gip1,Mrpl41,Mrpl30
18_Member	Reactome Gene Sets	R-MMU-5419276	Mitochondrial translation termination	-16.0543	-13.8039	Mrps33,Mrpl23,Mrps12,Mrpl17,Mrps7,Mrpl12,Mrpl19,Mrps23,Mrps14,Mrps24,Mrpl54,Aurkaip1,Chchd1,Mrpl4,Mrps17,Mrps21,Mrpl20,Mrpl51,Mrpl33,Mrps18b,Mrpl55,Mrpl42,Mrpl18,Mrpl57,Mrpl14,Mrpl53,Mrps18a,Mrpl28,Mrps18c,Mrpl52,Mrps34,Mrpl27,Mrpl34,Mrpl36,Gadd45gip1,Mrpl41,Mrpl30
18_Member	Reactome Gene Sets	R-MMU-5368287	Mitochondrial translation	-15.8503	-13.6123	Mrps33,Mrpl23,Mrps12,Mrpl17,Mrps7,Mrpl12,Mrpl19,Mrps23,Mrps14,Mrps24,Mrpl54,Aurkaip1,Chchd1,Mrpl4,Mrps17,Mrps21,Mrpl20,Mrpl51,Mrpl33,Mrps18b,Mrpl55,Mrpl42,Mrpl18,Mrpl57,Mrpl14,Mrpl53,Mrps18a,Mrpl28,Mrps18c,Mrpl52,Mrps34,Mrpl27,Mrpl34,Mrpl36,Gadd45gip1,Mrpl41,Mrpl30
18_Member	GO Biological Processes	GO:0032543	mitochondrial translation	-15.0014	-12.8132	Mrps33,Mrpl23,Mrps12,Mrpl17,Mrps7,Mrpl12,Mrpl19,Mrps23,Mrps14,Mrps24,Mrpl54,Aurkaip1,Chchd1,Mrpl4,Mrps17,Mrps21,Ndufa7,Mrpl20,Mrpl51,Mrpl33,Mrps18b,Mrpl55,Mrpl42,Mrpl18,Mrpl57,Mrpl14,Mrpl53,Mrps18a,Mrpl28,Mrps18c,Mrpl52,Mrps34,Mrpl27,Mrpl34,Mrpl36,Mrpl43,Gadd45gip1,Lars2,Mrpl41,Mrpl30,Tufm
18_Member	GO Biological Processes	GO:0140053	mitochondrial gene expression	-12.427	-10.3499	Cfh,Mrps33,Hsd17b10,Mrpl23,Tbrg4,Mrps12,Mrpl17,Mrps7,Mrpl12,Mrpl19,Mrps23,Mrps14,Mrps24,Mrpl54,Aurkaip1,Chchd1,Mrpl4,Mrps17,Mrps21,Ndufa7,Mrpl20,Mrpl51,Mrpl33,Mrps18b,Mrpl55,Mrpl42,Mrpl18,Mrpl57,Mrpl14,Mrpl53,Mrps18a,Mrpl28,Mrps18c,Mrpl52,Mrps34,Mrpl27,Mrpl34,Mrpl36,Mrpl43,Gadd45gip1,Lars2,Mrpl41,Mrpl30,Tufm
19_Summary	CORUM	CORUM:3047	Parvulin-associated pre-rRNP complex	-15.9195	-13.6733	Rplp0,Fn1,Rrp1,Rpl18,Rpl19,Rpl21,Rpl26,Rpl6,Rpl7,Rps3a1,Rps4x,Rps6,Rps8,Rpl13a,Tubb5,Rpl8,Rps3,Rpl7a,Rpl3,Ftsj3,Rpl15,Rpl14,Eef1g,Rpl4,Nifk,Rpl18a,Rpl13,Rpl5
19_Member	CORUM	CORUM:3047	Parvulin-associated pre-rRNP complex	-15.9195	-13.6733	Rplp0,Fn1,Rrp1,Rpl18,Rpl19,Rpl21,Rpl26,Rpl6,Rpl7,Rps3a1,Rps4x,Rps6,Rps8,Rpl13a,Tubb5,Rpl8,Rps3,Rpl7a,Rpl3,Ftsj3,Rpl15,Rpl14,Eef1g,Rpl4,Nifk,Rpl18a,Rpl13,Rpl5
20_Summary	Reactome Gene Sets	R-MMU-1474244	Extracellular matrix organization	-15.8508	-13.6123	Adam19,Bgn,Bmp1,Capns1,Serpinh1,Cd44,Col14a1,Col18a1,Col3a1,Col4a1,Col4a4,Col6a1,Col6a2,Col1a1,Col1a2,Ctsb,Ctsd,Ctsk,Ctsl,Ctss,Dcn,Eln,Fbln2,Fbn1,Fn1,Itga4,Itga5,Itgal,Itgb1,Itgb2,F11r,Lox,Loxl1,Lum,Mmp14,Mmp15,Mmp2,Ddr2,P4hb,Pcolce,Pecam1,Plod1,Ppib,Sparc,Sdc3,Sdc4,Tgfb1,Tgfb2,Timp1,Tnc,Fbln5,Plod2,Plod3,Mfap5,Htra1,Jam2,Pcolce2,Tnxb,Loxl2,Itga9,Ltbp4,P3h2,Emilin2,Ltbp1,Col27a1,Anxa2,Cyp1b1,Sfrp…
20_Member	Reactome Gene Sets	R-MMU-1474244	Extracellular matrix organization	-15.8508	-13.6123	Adam19,Bgn,Bmp1,Capns1,Serpinh1,Cd44,Col14a1,Col18a1,Col3a1,Col4a1,Col4a4,Col6a1,Col6a2,Col1a1,Col1a2,Ctsb,Ctsd,Ctsk,Ctsl,Ctss,Dcn,Eln,Fbln2,Fbn1,Fn1,Itga4,Itga5,Itgal,Itgb1,Itgb2,F11r,Lox,Loxl1,Lum,Mmp14,Mmp15,Mmp2,Ddr2,P4hb,Pcolce,Pecam1,Plod1,Ppib,Sparc,Sdc3,Sdc4,Tgfb1,Tgfb2,Timp1,Tnc,Fbln5,Plod2,Plod3,Mfap5,Htra1,Jam2,Pcolce2,Tnxb,Loxl2,Itga9,Ltbp4,P3h2,Emilin2,Ltbp1,Col27a1
20_Member	Reactome Gene Sets	R-MMU-1474290	Collagen formation	-9.15821	-7.29221	Bmp1,Serpinh1,Col14a1,Col18a1,Col3a1,Col4a1,Col4a4,Col6a1,Col6a2,Col1a1,Col1a2,Ctsb,Ctsl,Ctss,Lox,Loxl1,P4hb,Pcolce,Plod1,Ppib,Plod2,Plod3,Pcolce2,Loxl2,P3h2,Col27a1
20_Member	Reactome Gene Sets	R-MMU-1650814	Collagen biosynthesis and modifying enzymes	-6.64948	-4.98522	Bmp1,Serpinh1,Col14a1,Col18a1,Col3a1,Col4a1,Col4a4,Col6a1,Col6a2,Col1a1,Col1a2,P4hb,Pcolce,Plod1,Ppib,Plod2,Plod3,Pcolce2,P3h2,Col27a1
20_Member	Reactome Gene Sets	R-MMU-2022090	Assembly of collagen fibrils and other multimeric structures	-6.63758	-4.9744	Bmp1,Col14a1,Col18a1,Col3a1,Col4a1,Col6a1,Col6a2,Col1a1,Col1a2,Ctsb,Ctsl,Ctss,Lox,Loxl1,Pcolce,Loxl2,Col27a1
20_Member	GO Biological Processes	GO:0030199	collagen fibril organization	-6.04737	-4.4603	Anxa2,Serpinh1,Col14a1,Col18a1,Col3a1,Col1a1,Col1a2,Cyp1b1,Lox,Loxl1,Ddr2,Sfrp2,Tgfb2,Plod3,Dpt,Tnxb,Loxl2,Col27a1
20_Member	GO Biological Processes	GO:0032963	collagen metabolic process	-5.41853	-3.8962	Serpinh1,Col1a1,Col1a2,Ctsb,Ctsk,Ctsl,Ctss,Id1,Mmp14,Mmp15,Mmp2,Plod3,Mmp23,Naglu,Rcn3,Smpd3,Tnxb,P3h2
20_Member	Reactome Gene Sets	R-MMU-2243919	Crosslinking of collagen fibrils	-4.71606	-3.27537	Bmp1,Col4a1,Col1a1,Col1a2,Lox,Loxl1,Pcolce,Loxl2
20_Member	Reactome Gene Sets	R-MMU-1474228	Degradation of the extracellular matrix	-3.97669	-2.62783	Capns1,Cd44,Col18a1,Col3a1,Col4a1,Col6a1,Col6a2,Col1a1,Col1a2,Ctsb,Ctsd,Ctsk,Ctsl,Ctss,Dcn,Eln,Fbn1,Fn1,Mmp14,Mmp15,Mmp2,Timp1,Htra1
20_Member	Reactome Gene Sets	R-MMU-1442490	Collagen degradation	-3.42063	-2.15668	Col18a1,Col3a1,Col4a1,Col6a1,Col6a2,Col1a1,Col1a2,Ctsb,Ctsd,Ctsk,Ctsl,Mmp14,Mmp15,Mmp2

## Sheet: Cluster 3
GroupID	Category	Term	Description	LogP	Log(q-value)	Symbols
1_Summary	GO Biological Processes	GO:0006338	chromatin remodeling	-6.34043	-2.23362	Cdyl,Ctcf,Epc1,Per2,Satb1,Kdm5d,Srpk2,Suv39h1,Uty,a,Kat6b,Kcnq1ot1,Smarcd3,Smarca2,Fam172a,Rere,Smyd3,Pwwp2a,Kdm4c,Ehmt1,Arid4b,Airn,Rnf20,Brdt,Glmn,Zfp369,Pphln1,Kdm2a,Nsd3,Usp3,Zfp445,Arid1b,Chd2,Kdm4d,Ercc6,Mysm1,Chd7,Pabpc1l,Esr1,Tlk2,Med14,Cenpo,Sfmbt1,Pias1,Hdac8,Setd5,Kansl1,Babam2,Taf3,L3mbtl3,Zfp462,Ncoa1,Arid5b,Jade3
1_Member	GO Biological Processes	GO:0006338	chromatin remodeling	-6.34043	-2.23362	Cdyl,Ctcf,Epc1,Per2,Satb1,Kdm5d,Srpk2,Suv39h1,Uty,a,Kat6b,Kcnq1ot1,Smarcd3,Smarca2,Fam172a,Rere,Smyd3,Pwwp2a,Kdm4c,Ehmt1,Arid4b,Airn,Rnf20,Brdt,Glmn,Zfp369,Pphln1,Kdm2a,Nsd3,Usp3,Zfp445,Arid1b,Chd2,Kdm4d,Ercc6,Mysm1,Chd7,Pabpc1l
1_Member	GO Biological Processes	GO:0071824	protein-DNA complex organization	-6.19999	-2.23362	Cdyl,Ctcf,Epc1,Esr1,Per2,Satb1,Kdm5d,Srpk2,Suv39h1,Uty,Tlk2,Med14,a,Cenpo,Kat6b,Sfmbt1,Pias1,Kcnq1ot1,Smarcd3,Smarca2,Fam172a,Rere,Smyd3,Hdac8,Pwwp2a,Setd5,Kansl1,Kdm4c,Ehmt1,Arid4b,Airn,Babam2,Rnf20,Brdt,Glmn,Zfp369,Taf3,Pphln1,Kdm2a,Nsd3,Usp3,Zfp445,L3mbtl3,Arid1b,Zfp462,Chd2,Kdm4d,Ercc6,Mysm1,Chd7,Pabpc1l
1_Member	GO Biological Processes	GO:0006325	chromatin organization	-5.78446	-1.99418	Cdyl,Ctcf,Epc1,Per2,Satb1,Kdm5d,Srpk2,Suv39h1,Uty,Tlk2,a,Kat6b,Sfmbt1,Kcnq1ot1,Smarcd3,Smarca2,Fam172a,Rere,Smyd3,Hdac8,Pwwp2a,Setd5,Kansl1,Kdm4c,Ehmt1,Arid4b,Airn,Babam2,Rnf20,Brdt,Glmn,Zfp369,Pphln1,Kdm2a,Nsd3,Usp3,Zfp445,L3mbtl3,Arid1b,Zfp462,Chd2,Kdm4d,Ercc6,Mysm1,Chd7,Pabpc1l
1_Member	Reactome Gene Sets	R-MMU-3247509	Chromatin modifying enzymes	-3.08282	-0.441346	Ncoa1,Suv39h1,Kat6b,Smarcd3,Smarca2,Smyd3,Arid5b,Kansl1,Kdm4c,Ehmt1,Arid4b,Kdm2a,Nsd3,Arid1b,Kdm4d,Jade3
1_Member	Reactome Gene Sets	R-MMU-4839726	Chromatin organization	-3.08282	-0.441346	Ncoa1,Suv39h1,Kat6b,Smarcd3,Smarca2,Smyd3,Arid5b,Kansl1,Kdm4c,Ehmt1,Arid4b,Kdm2a,Nsd3,Arid1b,Kdm4d,Jade3
1_Member	GO Biological Processes	GO:0040029	epigenetic regulation of gene expression	-2.94305	-0.401569	Cdyl,Ctcf,Epc1,Suv39h1,Uty,a,Kcnq1ot1,Fam172a,Ehmt1,Arid4b,Airn,Glmn,Pphln1,Kdm2a,Zfp445,Pabpc1l
1_Member	GO Biological Processes	GO:0045814	negative regulation of gene expression, epigenetic	-2.45913	-0.2267	Ctcf,Epc1,Suv39h1,Uty,Kcnq1ot1,Fam172a,Ehmt1,Pphln1,Zfp445
2_Summary	GO Biological Processes	GO:0016071	mRNA metabolic process	-5.22304	-1.55769	Ap3b1,Cpeb1,Celf2,Hnrnpl,Ncoa1,Pnn,Pparg,Prpf4b,Rbbp6,Rbm4,Rbm6,Srpk2,Thrb,Rngtt,Akap8l,Pabpn1,Prpf40b,Rbm14,Adar,Ddx17,Fam172a,Dnajc17,Taf4b,Khdc4,Wdr33,Samd4,Pcf11,Rbfox2,Tent2,Smg6,Cnot6,Brdt,Luc7l2,Taf3,Srek1,Scaf4,Ppwd1,Ctif,Dcp1b,Zcchc7,Pabpc1l,Zhx2,Clk1,Clk4,Zfp638,Atxn1,Cnot4,Sltm,Srsf11,Taf15,Bclaf1,Hnrnpr,Ppargc1b,Rbms3,Cpeb3,Tnrc6c,Malat1,Fto,Traf3ip2,Supt3,Atxn7
2_Member	GO Biological Processes	GO:0016071	mRNA metabolic process	-5.22304	-1.55769	Ap3b1,Cpeb1,Celf2,Hnrnpl,Ncoa1,Pnn,Pparg,Prpf4b,Rbbp6,Rbm4,Rbm6,Srpk2,Thrb,Rngtt,Akap8l,Pabpn1,Prpf40b,Rbm14,Adar,Ddx17,Fam172a,Dnajc17,Taf4b,Khdc4,Wdr33,Samd4,Pcf11,Rbfox2,Tent2,Smg6,Cnot6,Brdt,Luc7l2,Taf3,Srek1,Scaf4,Ppwd1,Ctif,Dcp1b,Zcchc7,Pabpc1l,Zhx2
2_Member	GO Biological Processes	GO:0006397	mRNA processing	-3.46156	-0.555878	Cpeb1,Celf2,Hnrnpl,Pnn,Prpf4b,Rbbp6,Rbm4,Rbm6,Srpk2,Rngtt,Akap8l,Pabpn1,Prpf40b,Rbm14,Adar,Ddx17,Fam172a,Dnajc17,Khdc4,Wdr33,Pcf11,Rbfox2,Tent2,Brdt,Luc7l2,Srek1,Scaf4,Ppwd1,Pabpc1l
2_Member	WikiPathways	WP310	mRNA processing	-3.17956	-0.462456	Clk1,Clk4,Cpeb1,Celf2,Hnrnpl,Zfp638,Prpf4b,Rbm4,Rbm6,Atxn1,Srpk2,Rngtt,Cnot4,Pabpn1,Prpf40b,Rbm14,Adar,Sltm,Srsf11,Dnajc17,Taf15,Bclaf1,Hnrnpr,Rbfox2,Ppargc1b,Rbms3,Cpeb3,Tnrc6c,Srek1
2_Member	GO Biological Processes	GO:0000381	regulation of alternative mRNA splicing, via spliceosome	-2.4835	-0.228931	Celf2,Hnrnpl,Rbm4,Ddx17,Fam172a,Malat1,Rbfox2
2_Member	GO Biological Processes	GO:1903311	regulation of mRNA metabolic process	-2.12976	-0.0664766	Cpeb1,Celf2,Hnrnpl,Rbm4,Srpk2,Fto,Sltm,Ddx17,Fam172a,Taf15,Malat1,Hnrnpr,Samd4,Rbfox2,Traf3ip2,Cnot6,Cpeb3,Tnrc6c,Dcp1b
2_Member	GO Biological Processes	GO:0050684	regulation of mRNA processing	-2.01964	-0.0355324	Cpeb1,Celf2,Hnrnpl,Rbm4,Srpk2,Sltm,Ddx17,Fam172a,Malat1,Rbfox2,Cpeb3
2_Member	GO Biological Processes	GO:0043484	regulation of RNA splicing	-2.0094	-0.0297919	Clk1,Clk4,Celf2,Hnrnpl,Zfp638,Rbm4,Ddx17,Fam172a,Malat1,Rbfox2,Supt3,Brdt,Atxn7
3_Summary	GO Biological Processes	GO:0006468	protein phosphorylation	-4.7575	-1.18907	Abl1,Acvr2b,Clk1,Clk4,Mark2,Hipk2,Kit,Lama1,Mertk,Met,Pak3,Phka1,Phkg1,Prkca,Prkcg,Prkce,Prkd1,Ppp3cb,Prlr,Prpf4b,Srpk2,Tlk2,Map3k5,Eif2ak4,Stk39,Stk3,Map3k20,Dapk1,Sik3,Taf4b,Tex14,Phip,Prkag2,Phka2,Erc1,Sgk3,Taf3,Csnk1g1,Trio,Map4k3,Sik2,Pdk3,Peak1,Cdk8,Cdkl5,Map4k5,Nek10,Epc1,Nktr,Suv39h1,Kat6b,Pias1,Asph,Ttll4,Sirt5,Smyd3,Camkmt,Kansl1,Ehmt1,Eogt,Supt3,Smc5,Ppwd1,Phf20l1,Atxn7,Smo,Ttll5,Jade3
3_Member	GO Biological Processes	GO:0006468	protein phosphorylation	-4.7575	-1.18907	Abl1,Acvr2b,Clk1,Clk4,Mark2,Hipk2,Kit,Lama1,Mertk,Met,Pak3,Phka1,Phkg1,Prkca,Prkcg,Prkce,Prkd1,Ppp3cb,Prlr,Prpf4b,Srpk2,Tlk2,Map3k5,Eif2ak4,Stk39,Stk3,Map3k20,Dapk1,Sik3,Taf4b,Tex14,Phip,Prkag2,Phka2,Erc1,Sgk3,Taf3,Csnk1g1,Trio,Map4k3,Sik2,Pdk3,Peak1,Cdk8,Cdkl5,Map4k5,Nek10
3_Member	GO Biological Processes	GO:0046777	protein autophosphorylation	-3.91937	-0.731143	Abl1,Clk1,Clk4,Mark2,Kit,Met,Phka1,Prkca,Prkcg,Prkd1,Eif2ak4,Stk39,Map3k20,Dapk1,Csnk1g1,Sik2,Peak1,Cdkl5
3_Member	GO Biological Processes	GO:0018193	peptidyl-amino acid modification	-3.07528	-0.441346	Abl1,Clk1,Clk4,Mark2,Epc1,Hipk2,Kit,Nktr,Prkca,Prkcg,Prkce,Prkd1,Prlr,Srpk2,Suv39h1,Tlk2,Stk39,Kat6b,Pias1,Asph,Ttll4,Sirt5,Smyd3,Camkmt,Kansl1,Ehmt1,Phip,Eogt,Supt3,Sgk3,Csnk1g1,Smc5,Pdk3,Ppwd1,Phf20l1,Atxn7,Smo,Ttll5,Jade3
3_Member	GO Biological Processes	GO:0018105	peptidyl-serine phosphorylation	-2.48729	-0.228931	Clk1,Mark2,Hipk2,Prkca,Prkcg,Prkce,Prkd1,Srpk2,Tlk2,Stk39,Phip,Sgk3,Csnk1g1,Pdk3
3_Member	GO Biological Processes	GO:0018209	peptidyl-serine modification	-2.11276	-0.0614198	Clk1,Mark2,Hipk2,Prkca,Prkcg,Prkce,Prkd1,Srpk2,Tlk2,Stk39,Phip,Sgk3,Csnk1g1,Pdk3
4_Summary	GO Biological Processes	GO:0035264	multicellular organism growth	-4.57667	-1.12554	Ar,Ext1,Rbbp6,Ercc5,Chaserr,Sik3,Arid5b,Ttc8,Plekha1,Rarb,Kdm2a,Lncpint,Pde4d,Smo,Ercc6,Zfp950,Acvr2b,Efna5,Esr1,Fgf2,Gas2,Gli2,Meis1,Prlr,Rad51b,Slit3,Tenm4,Eif2ak4,Stk3,Foxp2,Bnc2,Scaper,Auts2
4_Member	GO Biological Processes	GO:0035264	multicellular organism growth	-4.57667	-1.12554	Ar,Ext1,Rbbp6,Ercc5,Chaserr,Sik3,Arid5b,Ttc8,Plekha1,Rarb,Kdm2a,Lncpint,Pde4d,Smo,Ercc6,Zfp950
4_Member	GO Biological Processes	GO:0040007	growth	-3.20372	-0.462456	Acvr2b,Ar,Efna5,Esr1,Ext1,Fgf2,Gas2,Gli2,Meis1,Prlr,Rad51b,Rbbp6,Slit3,Ercc5,Tenm4,Eif2ak4,Stk3,Chaserr,Sik3,Arid5b,Ttc8,Plekha1,Foxp2,Rarb,Kdm2a,Lncpint,Pde4d,Bnc2,Scaper,Smo,Ercc6,Auts2,Zfp950
4_Member	GO Biological Processes	GO:0048589	developmental growth	-2.97034	-0.401569	Acvr2b,Ar,Efna5,Esr1,Ext1,Fgf2,Gas2,Gli2,Meis1,Prlr,Rad51b,Rbbp6,Slit3,Ercc5,Tenm4,Eif2ak4,Stk3,Chaserr,Sik3,Arid5b,Ttc8,Plekha1,Rarb,Kdm2a,Lncpint,Pde4d,Bnc2,Scaper,Smo,Ercc6,Auts2,Zfp950
4_Member	GO Biological Processes	GO:0035265	organ growth	-2.26723	-0.153395	Acvr2b,Ar,Esr1,Ext1,Fgf2,Meis1,Prlr,Tenm4,Stk3,Rarb,Bnc2
5_Summary	Reactome Gene Sets	R-MMU-383280	Nuclear Receptor transcription pathway	-4.53703	-1.12554	Ar,Nr2f1,Esr1,Ppara,Pparg,Rora,Thrb,Esrrg,Rarb,Pias1,Ddx17,Rbfox2,Ppargc1b,Ncoa1,Colec12,Pdk3,Cpeb1,Efna5,Kit,Prkce,Uri1,Sorbs1,Tshr,Ceacam2,Grb14,Foxo1,Smyd3,C2cd5,Phip,Acaca,Nr3c2,Bcas3,Sik2,Pde4d
5_Member	Reactome Gene Sets	R-MMU-383280	Nuclear Receptor transcription pathway	-4.53703	-1.12554	Ar,Nr2f1,Esr1,Ppara,Pparg,Rora,Thrb,Esrrg,Rarb
5_Member	WikiPathways	WP509	Nuclear Receptors	-4.45613	-1.12554	Ar,Nr2f1,Esr1,Ppara,Pparg,Rora,Thrb,Rarb
5_Member	Reactome Gene Sets	R-MMU-4090294	SUMOylation of intracellular receptors	-3.76788	-0.646599	Ar,Esr1,Ppara,Rora,Thrb,Pias1
5_Member	GO Biological Processes	GO:0030520	intracellular estrogen receptor signaling pathway	-3.62449	-0.58753	Ar,Esr1,Ddx17,Rbfox2,Ppargc1b
5_Member	GO Biological Processes	GO:0030522	intracellular receptor signaling pathway	-3.43734	-0.550143	Ar,Esr1,Ncoa1,Pparg,Rora,Thrb,Esrrg,Ddx17,Rbfox2,Colec12,Ppargc1b,Rarb,Pdk3
5_Member	GO Biological Processes	GO:0032870	cellular response to hormone stimulus	-3.17088	-0.462456	Ar,Cpeb1,Efna5,Esr1,Kit,Ncoa1,Prkce,Ppara,Pparg,Uri1,Sorbs1,Thrb,Tshr,Ceacam2,Grb14,Foxo1,Ddx17,Smyd3,C2cd5,Phip,Rbfox2,Acaca,Nr3c2,Ppargc1b,Bcas3,Rarb,Sik2,Pde4d
5_Member	GO Biological Processes	GO:0009755	hormone-mediated signaling pathway	-2.91572	-0.401569	Ar,Esr1,Ppara,Pparg,Thrb,Tshr,Ddx17,Rbfox2,Ppargc1b,Rarb
5_Member	GO Biological Processes	GO:0048384	retinoic acid receptor signaling pathway	-2.41856	-0.2267	Pparg,Thrb,Esrrg,Rarb
6_Summary	GO Biological Processes	GO:1904048	regulation of spontaneous neurotransmitter secretion	-4.43871	-1.12554	Prkn,Stx1b,Ppp1r9a,Hk2,Smurf1
6_Member	GO Biological Processes	GO:1904048	regulation of spontaneous neurotransmitter secretion	-4.43871	-1.12554	Prkn,Stx1b,Ppp1r9a
6_Member	GO Biological Processes	GO:0150003	regulation of spontaneous synaptic transmission	-2.93814	-0.401569	Prkn,Stx1b,Ppp1r9a
6_Member	GO Biological Processes	GO:1904925	positive regulation of autophagy of mitochondrion in response to mitochondrial depolarization	-2.09053	-0.0586475	Hk2,Prkn,Smurf1
7_Summary	CORUM	CORUM:349	Sarcoglycan-sarcospan-syntrophin-dystrobrevin complex	-4.1208	-0.853391	Dtna,Snta1,Sntb1,Sgcd,Cacna1c,Uty,Ank2,Myo1b,Pard3,Myrip
7_Member	CORUM	CORUM:349	Sarcoglycan-sarcospan-syntrophin-dystrobrevin complex	-4.1208	-0.853391	Dtna,Snta1,Sntb1,Sgcd
7_Member	GO Biological Processes	GO:0086003	cardiac muscle cell contraction	-2.0941	-0.0586475	Cacna1c,Snta1,Uty,Sgcd,Ank2
7_Member	GO Biological Processes	GO:0030048	actin filament-based movement	-2.02494	-0.0355324	Cacna1c,Myo1b,Snta1,Uty,Sgcd,Pard3,Ank2,Myrip
8_Summary	KEGG Pathway	mmu04340	Hedgehog signaling pathway - Mus musculus (house mouse)	-3.93791	-0.731143	Btrc,Gli2,Ptch2,Smurf2,Evc2,Smurf1,Boc,Csnk1g1,Smo,Fgf2,Ar,Esr1,Prlr
8_Member	KEGG Pathway	mmu04340	Hedgehog signaling pathway - Mus musculus (house mouse)	-3.93791	-0.731143	Btrc,Gli2,Ptch2,Smurf2,Evc2,Smurf1,Boc,Csnk1g1,Smo
8_Member	GO Biological Processes	GO:0021940	positive regulation of cerebellar granule cell precursor proliferation	-2.30792	-0.172493	Fgf2,Gli2,Smo
8_Member	GO Biological Processes	GO:0061180	mammary gland epithelium development	-2.10654	-0.0614198	Ar,Btrc,Esr1,Fgf2,Gli2,Prlr,Smo
9_Summary	GO Biological Processes	GO:0044828	negative regulation by host of viral genome replication	-3.8771	-0.723632	Eif2ak4,Prkn,Smc6,Smc5
9_Member	GO Biological Processes	GO:0044828	negative regulation by host of viral genome replication	-3.8771	-0.723632	Eif2ak4,Prkn,Smc6,Smc5
9_Member	GO Biological Processes	GO:0044793	negative regulation by host of viral process	-3.03468	-0.410731	Eif2ak4,Prkn,Smc6,Smc5
9_Member	GO Biological Processes	GO:0044827	modulation by host of viral genome replication	-2.19084	-0.105281	Eif2ak4,Prkn,Smc6,Smc5
10_Summary	GO Biological Processes	GO:0022604	regulation of cell morphogenesis	-3.72542	-0.634108	Efna5,Mark2,Gas2,Kit,Met,Pak3,Palm,Ptprd,Ttc3,Coro1b,Sh3d19,Stau2,Prkn,Rreb1,Smurf1,Phip,Zmym6,Rims1,Myo9a,Strip2,Zranb1,Cdkl5
10_Member	GO Biological Processes	GO:0022604	regulation of cell morphogenesis	-3.72542	-0.634108	Efna5,Mark2,Gas2,Kit,Met,Pak3,Palm,Ptprd,Ttc3,Coro1b,Sh3d19,Stau2,Prkn,Rreb1,Smurf1,Phip,Zmym6,Rims1,Myo9a,Strip2,Zranb1,Cdkl5
11_Summary	GO Biological Processes	GO:0007167	enzyme-linked receptor protein signaling pathway	-3.64599	-0.58753	Abl1,Acvr2b,Ar,Btc,Efna5,Ext1,Fgf2,Gng7,Hipk2,Hpgd,Kif16b,Kit,Mertk,Met,Nfia,Prkd1,Pparg,Prlr,Atxn1,Sorbs1,Grb14,Fut8,Rbm14,Foxo1,Smurf2,Arid5b,Plce1,C2cd5,Smurf1,Clasp2,Phip,Nrg4,Plekha1,Tnrc6c,Sik2,Atxn7,Zfp950,Akap7,Alkal2
11_Member	GO Biological Processes	GO:0007167	enzyme-linked receptor protein signaling pathway	-3.64599	-0.58753	Abl1,Acvr2b,Ar,Btc,Efna5,Ext1,Fgf2,Gng7,Hipk2,Hpgd,Kif16b,Kit,Mertk,Met,Nfia,Prkd1,Pparg,Prlr,Atxn1,Sorbs1,Grb14,Fut8,Rbm14,Foxo1,Smurf2,Arid5b,Plce1,C2cd5,Smurf1,Clasp2,Phip,Nrg4,Plekha1,Tnrc6c,Sik2,Atxn7,Zfp950,Akap7,Alkal2
11_Member	GO Biological Processes	GO:0007169	transmembrane receptor protein tyrosine kinase signaling pathway	-3.39362	-0.541187	Abl1,Ar,Btc,Efna5,Ext1,Fgf2,Kif16b,Kit,Mertk,Met,Prkd1,Prlr,Atxn1,Sorbs1,Grb14,Foxo1,Arid5b,Plce1,C2cd5,Clasp2,Phip,Nrg4,Plekha1,Sik2,Atxn7,Zfp950,Alkal2
12_Summary	GO Biological Processes	GO:0035107	appendage morphogenesis	-3.51879	-0.578848	Cacna1c,Ext1,Gli2,Nfia,Pbx1,Pcsk5,Fbxw4,Reck,Lmbr1,Map3k20,Asph,Sik3,Wdpcp,Rarb,Zbtb16,Chd7,Smoc1,Acvr2b,Cys1,Fgf2,Arid5b,Pygo1,Plce1,Ttc8,Traf3ip2,Adamts6,Smo,Greb1l,Zfp950
12_Member	GO Biological Processes	GO:0035107	appendage morphogenesis	-3.51879	-0.578848	Cacna1c,Ext1,Gli2,Nfia,Pbx1,Pcsk5,Fbxw4,Reck,Lmbr1,Map3k20,Asph,Sik3,Wdpcp,Rarb,Zbtb16,Chd7
12_Member	GO Biological Processes	GO:0035108	limb morphogenesis	-3.51879	-0.578848	Cacna1c,Ext1,Gli2,Nfia,Pbx1,Pcsk5,Fbxw4,Reck,Lmbr1,Map3k20,Asph,Sik3,Wdpcp,Rarb,Zbtb16,Chd7
12_Member	GO Biological Processes	GO:0048736	appendage development	-3.15008	-0.462456	Cacna1c,Ext1,Gli2,Nfia,Pbx1,Pcsk5,Fbxw4,Reck,Lmbr1,Smoc1,Map3k20,Asph,Sik3,Wdpcp,Rarb,Zbtb16,Chd7
12_Member	GO Biological Processes	GO:0060173	limb development	-3.15008	-0.462456	Cacna1c,Ext1,Gli2,Nfia,Pbx1,Pcsk5,Fbxw4,Reck,Lmbr1,Smoc1,Map3k20,Asph,Sik3,Wdpcp,Rarb,Zbtb16,Chd7
12_Member	GO Biological Processes	GO:0072001	renal system development	-2.06345	-0.0513211	Acvr2b,Cys1,Ext1,Fgf2,Gli2,Nfia,Pbx1,Pcsk5,Arid5b,Pygo1,Plce1,Ttc8,Traf3ip2,Adamts6,Wdpcp,Rarb,Zbtb16,Smo,Greb1l,Zfp950
12_Member	GO Biological Processes	GO:0030326	embryonic limb morphogenesis	-2.06239	-0.0513211	Cacna1c,Gli2,Pbx1,Fbxw4,Reck,Lmbr1,Map3k20,Wdpcp,Rarb,Zbtb16,Chd7
12_Member	GO Biological Processes	GO:0035113	embryonic appendage morphogenesis	-2.06239	-0.0513211	Cacna1c,Gli2,Pbx1,Fbxw4,Reck,Lmbr1,Map3k20,Wdpcp,Rarb,Zbtb16,Chd7
13_Summary	GO Biological Processes	GO:0046835	carbohydrate phosphorylation	-3.50383	-0.578848	Epm2a,Hk2,Pfkfb1,Rbks,Fggy
13_Member	GO Biological Processes	GO:0046835	carbohydrate phosphorylation	-3.50383	-0.578848	Epm2a,Hk2,Pfkfb1,Rbks,Fggy
14_Summary	GO Biological Processes	GO:0036303	lymph vessel morphogenesis	-3.50383	-0.578848	Acvr2b,Fgf2,Ppp3cb,Ptpn14,Ccbe1
14_Member	GO Biological Processes	GO:0036303	lymph vessel morphogenesis	-3.50383	-0.578848	Acvr2b,Fgf2,Ppp3cb,Ptpn14,Ccbe1
14_Member	GO Biological Processes	GO:0001946	lymphangiogenesis	-2.79801	-0.343521	Acvr2b,Ppp3cb,Ptpn14,Ccbe1
14_Member	GO Biological Processes	GO:0001945	lymph vessel development	-2.68413	-0.291786	Acvr2b,Fgf2,Ppp3cb,Ptpn14,Ccbe1
15_Summary	GO Biological Processes	GO:0030728	ovulation	-3.50383	-0.578848	Gas2,Immp2l,Alms1,Pde4d,Nrip1,Esr1,Scaper,Plekha1,Kit,Mertk,Arid5b,Chd7
15_Member	GO Biological Processes	GO:0030728	ovulation	-3.50383	-0.578848	Gas2,Immp2l,Alms1,Pde4d,Nrip1
15_Member	GO Biological Processes	GO:0001547	antral ovarian follicle growth	-2.30792	-0.172493	Esr1,Gas2,Scaper
15_Member	GO Biological Processes	GO:0022602	ovulation cycle process	-2.26472	-0.153395	Esr1,Gas2,Plekha1,Pde4d,Scaper,Nrip1
15_Member	GO Biological Processes	GO:0046660	female sex differentiation	-2.10611	-0.0614198	Esr1,Gas2,Kit,Mertk,Arid5b,Immp2l,Plekha1,Pde4d,Scaper,Nrip1,Chd7
16_Summary	GO Biological Processes	GO:0048511	rhythmic process	-3.41655	-0.547086	Zfhx3,Btrc,Esr1,Gas2,Grin2b,Per2,Per3,Prkcg,Ppara,Pparg,Rai1,Rbm4,Rora,Suv39h1,Fbxw7,Dpyd,Plekha1,Kdm2a,Pde4d,Scaper,Nrip1,Fbxl17,Prkag2
16_Member	GO Biological Processes	GO:0048511	rhythmic process	-3.41655	-0.547086	Zfhx3,Btrc,Esr1,Gas2,Grin2b,Per2,Per3,Prkcg,Ppara,Pparg,Rai1,Rbm4,Rora,Suv39h1,Fbxw7,Dpyd,Plekha1,Kdm2a,Pde4d,Scaper,Nrip1
16_Member	GO Biological Processes	GO:0032922	circadian regulation of gene expression	-3.12614	-0.449803	Zfhx3,Per2,Per3,Ppara,Rai1,Rbm4,Rora,Kdm2a,Nrip1
16_Member	GO Biological Processes	GO:0042752	regulation of circadian rhythm	-2.90849	-0.401569	Zfhx3,Btrc,Per2,Per3,Prkcg,Ppara,Pparg,Rbm4,Rora,Fbxw7,Fbxl17,Kdm2a
16_Member	KEGG Pathway	mmu04710	Circadian rhythm - Mus musculus (house mouse)	-2.30318	-0.172493	Btrc,Per2,Per3,Rora,Prkag2
16_Member	GO Biological Processes	GO:0043153	entrainment of circadian clock by photoperiod	-2.05866	-0.0513211	Per2,Per3,Rbm4,Fbxl17
17_Summary	GO Biological Processes	GO:0043631	RNA polyadenylation	-3.32431	-0.488267	Pabpn1,Wdr33,Pcf11,Tent2,Zcchc7,Pabpc1l
17_Member	GO Biological Processes	GO:0043631	RNA polyadenylation	-3.32431	-0.488267	Pabpn1,Wdr33,Pcf11,Tent2,Zcchc7,Pabpc1l
17_Member	GO Biological Processes	GO:0006378	mRNA polyadenylation	-2.61381	-0.252149	Pabpn1,Wdr33,Pcf11,Tent2,Pabpc1l
18_Summary	GO Biological Processes	GO:0048638	regulation of developmental growth	-3.29357	-0.473319	Abl1,Adrb3,Ar,Cacna1c,Capn3,Efna5,Fgf2,Ppara,Rai1,Suv39h1,Tshr,Trpv2,Zfpm2,Fto,Prkn,Golga4,Stk3,Dusp10,Smurf1,Clasp2,Mbd5,Rims1,Vgll4,Alms1,Smo,Chd7,Cdkl5,Epm2a,Pparg,Ptch2,Uri1,Slit3,Tead1,Ceacam2,Smarca2,Phip,Sesn1
18_Member	GO Biological Processes	GO:0048638	regulation of developmental growth	-3.29357	-0.473319	Abl1,Adrb3,Ar,Cacna1c,Capn3,Efna5,Fgf2,Ppara,Rai1,Suv39h1,Tshr,Trpv2,Zfpm2,Fto,Prkn,Golga4,Stk3,Dusp10,Smurf1,Clasp2,Mbd5,Rims1,Vgll4,Alms1,Smo,Chd7,Cdkl5
18_Member	GO Biological Processes	GO:0040014	regulation of multicellular organism growth	-2.55687	-0.233944	Adrb3,Rai1,Suv39h1,Tshr,Fto,Mbd5,Alms1,Smo,Chd7
18_Member	GO Biological Processes	GO:0040008	regulation of growth	-2.51219	-0.228931	Abl1,Adrb3,Ar,Cacna1c,Capn3,Efna5,Epm2a,Fgf2,Ppara,Pparg,Ptch2,Rai1,Uri1,Slit3,Suv39h1,Tead1,Tshr,Trpv2,Zfpm2,Ceacam2,Fto,Prkn,Golga4,Stk3,Dusp10,Smarca2,Smurf1,Clasp2,Phip,Mbd5,Rims1,Sesn1,Vgll4,Alms1,Smo,Chd7,Cdkl5
19_Summary	GO Biological Processes	GO:0045197	establishment or maintenance of epithelial cell apical/basal polarity	-3.24703	-0.462456	Mark2,Lama1,Pard3b,Ttc8,Pard3,Ophn1,Myo9a,Lama3,Wdpcp,Alms1,Rab11fip2,Clasp2,Sdccag8,Traf3ip2,Cdk5rap2
19_Member	GO Biological Processes	GO:0045197	establishment or maintenance of epithelial cell apical/basal polarity	-3.24703	-0.462456	Mark2,Lama1,Pard3b,Ttc8,Pard3,Ophn1,Myo9a
19_Member	GO Biological Processes	GO:0035088	establishment or maintenance of apical/basal cell polarity	-2.90555	-0.401569	Mark2,Lama1,Pard3b,Ttc8,Pard3,Ophn1,Myo9a
19_Member	GO Biological Processes	GO:0061245	establishment or maintenance of bipolar cell polarity	-2.90555	-0.401569	Mark2,Lama1,Pard3b,Ttc8,Pard3,Ophn1,Myo9a
19_Member	GO Biological Processes	GO:0001738	morphogenesis of a polarized epithelium	-2.65966	-0.278749	Lama1,Lama3,Ttc8,Ophn1,Wdpcp,Alms1,Myo9a
19_Member	GO Biological Processes	GO:0030010	establishment of cell polarity	-2.50502	-0.228931	Mark2,Lama1,Pard3b,Rab11fip2,Ttc8,Clasp2,Sdccag8,Pard3,Ophn1,Traf3ip2,Cdk5rap2,Myo9a
19_Member	GO Biological Processes	GO:0045198	establishment of epithelial cell apical/basal polarity	-2.50405	-0.228931	Lama1,Ttc8,Ophn1,Myo9a
19_Member	GO Biological Processes	GO:0030859	polarized epithelial cell differentiation	-2.19084	-0.105281	Lama1,Ttc8,Ophn1,Myo9a
19_Member	GO Biological Processes	GO:0035089	establishment of apical/basal cell polarity	-2.19084	-0.105281	Lama1,Ttc8,Ophn1,Myo9a
19_Member	GO Biological Processes	GO:0061162	establishment of monopolar cell polarity	-2.05866	-0.0513211	Lama1,Ttc8,Ophn1,Myo9a
19_Member	GO Biological Processes	GO:0090162	establishment of epithelial cell polarity	-2.00002	-0.0226469	Lama1,Ttc8,Pard3,Ophn1,Myo9a
20_Summary	GO Biological Processes	GO:1903050	regulation of proteolysis involved in protein catabolic process	-3.24213	-0.462456	Btrc,Epm2a,Fhit,Hipk2,Prkcg,Tlk2,Fbxw7,Prkn,Pias1,Sh3rf1,Smurf1,Ophn1,Xpo1,Glmn,Rnf144b,L3mbtl3,Phf20l1,Rnf217
20_Member	GO Biological Processes	GO:1903050	regulation of proteolysis involved in protein catabolic process	-3.24213	-0.462456	Btrc,Epm2a,Fhit,Hipk2,Prkcg,Tlk2,Fbxw7,Prkn,Pias1,Sh3rf1,Smurf1,Ophn1,Xpo1,Glmn,Rnf144b,L3mbtl3,Phf20l1,Rnf217
20_Member	GO Biological Processes	GO:2000058	regulation of ubiquitin-dependent protein catabolic process	-2.80706	-0.343521	Fhit,Hipk2,Tlk2,Fbxw7,Prkn,Pias1,Sh3rf1,Smurf1,Xpo1,Glmn,Rnf144b,L3mbtl3,Phf20l1,Rnf217
20_Member	GO Biological Processes	GO:0061136	regulation of proteasomal protein catabolic process	-2.73651	-0.326617	Btrc,Epm2a,Fhit,Prkcg,Tlk2,Fbxw7,Prkn,Pias1,Sh3rf1,Ophn1,Xpo1,Glmn,Rnf144b,Phf20l1,Rnf217

## Sheet: Cluster 4
GroupID	Category	Term	Description	LogP	Log(q-value)	Symbols
1_Summary	WikiPathways	WP1251	Metapathway biotransformation	-6.46589	-2.19848	Cyp2e1,Cyp2f2,Ephx2,Fmo1,Fmo5,Gsr,Gsta3,Gsta4,Gstt1,Sult1a1,Hs3st3b1,Chst1,Fmo4,Maob,Rorc,Myc,Uck1,Ces1d,Ces1f,Bche,Gclc,Slc1a3,Ugp2
1_Member	WikiPathways	WP1251	Metapathway biotransformation	-6.46589	-2.19848	Cyp2e1,Cyp2f2,Ephx2,Fmo1,Fmo5,Gsr,Gsta3,Gsta4,Gstt1,Sult1a1,Hs3st3b1,Chst1,Fmo4
1_Member	KEGG Pathway	mmu00982	Drug metabolism - cytochrome P450 - Mus musculus (house mouse)	-4.83216	-0.909288	Cyp2e1,Fmo1,Fmo5,Gsta3,Gsta4,Gstt1,Maob,Fmo4
1_Member	GO Biological Processes	GO:0006805	xenobiotic metabolic process	-4.44494	-0.876502	Cyp2e1,Cyp2f2,Fmo1,Fmo5,Gsta3,Gsta4,Gstt1,Rorc,Sult1a1,Fmo4
1_Member	GO Biological Processes	GO:0071466	cellular response to xenobiotic stimulus	-3.70222	-0.473601	Cyp2e1,Cyp2f2,Fmo1,Fmo5,Gsta3,Gsta4,Gstt1,Myc,Rorc,Sult1a1,Fmo4
1_Member	KEGG Pathway	mmu00983	Drug metabolism - other enzymes - Mus musculus (house mouse)	-3.22259	-0.320968	Cyp2e1,Gsta3,Gsta4,Gstt1,Uck1,Ces1d,Ces1f
1_Member	GO Biological Processes	GO:0009410	response to xenobiotic stimulus	-3.03131	-0.303835	Bche,Cyp2e1,Cyp2f2,Fmo1,Fmo5,Gclc,Gsta3,Gsta4,Gstt1,Myc,Rorc,Slc1a3,Sult1a1,Fmo4
1_Member	Reactome Gene Sets	R-MMU-211859	Biological oxidations	-2.34936	-0.0886623	Cyp2e1,Cyp2f2,Fmo1,Gclc,Gsta3,Gstt1,Ces1d,Maob,Ugp2
1_Member	KEGG Pathway	mmu00980	Metabolism of xenobiotics by cytochrome P450 - Mus musculus (house mouse)	-2.24457	-0.074076	Cyp2e1,Cyp2f2,Gsta3,Gsta4,Gstt1
2_Summary	GO Biological Processes	GO:0019216	regulation of lipid metabolic process	-4.69957	-0.909288	Ephx2,Erbb4,Fmo1,Fmo5,Igf1r,Irs1,Pck1,Pde3b,Por,Ppargc1a,Rorc,Tcf7l2,Acacb,Ces1d,Fmo4,Ambra1,Ces1f,Hcar1,Etfbkmt,Myc,Pth1r,Slc7a11,Gpt2,Wdr5
2_Member	GO Biological Processes	GO:0019216	regulation of lipid metabolic process	-4.69957	-0.909288	Ephx2,Erbb4,Fmo1,Fmo5,Igf1r,Irs1,Pck1,Pde3b,Por,Ppargc1a,Rorc,Tcf7l2,Acacb,Ces1d,Fmo4,Ambra1,Ces1f,Hcar1,Etfbkmt
2_Member	GO Biological Processes	GO:0062012	regulation of small molecule metabolic process	-4.49499	-0.876502	Ephx2,Fmo1,Fmo5,Irs1,Myc,Por,Ppargc1a,Pth1r,Rorc,Tcf7l2,Slc7a11,Acacb,Ces1d,Gpt2,Wdr5,Fmo4,Ces1f,Etfbkmt
2_Member	GO Biological Processes	GO:0046320	regulation of fatty acid oxidation	-4.16982	-0.714759	Fmo1,Irs1,Ppargc1a,Acacb,Fmo4,Etfbkmt
2_Member	GO Biological Processes	GO:0046322	negative regulation of fatty acid oxidation	-3.82272	-0.473601	Fmo1,Acacb,Fmo4,Etfbkmt
2_Member	GO Biological Processes	GO:0010565	regulation of cellular ketone metabolic process	-2.96495	-0.282779	Fmo1,Irs1,Ppargc1a,Slc7a11,Acacb,Ces1d,Fmo4,Ces1f,Etfbkmt
2_Member	GO Biological Processes	GO:0050995	negative regulation of lipid catabolic process	-2.88005	-0.265852	Pde3b,Acacb,Hcar1,Etfbkmt
2_Member	GO Biological Processes	GO:0045922	negative regulation of fatty acid metabolic process	-2.50523	-0.148731	Fmo1,Acacb,Fmo4,Etfbkmt
2_Member	GO Biological Processes	GO:0031998	regulation of fatty acid beta-oxidation	-2.27537	-0.0783223	Irs1,Acacb,Etfbkmt
2_Member	GO Biological Processes	GO:0050994	regulation of lipid catabolic process	-2.26992	-0.0783223	Irs1,Pde3b,Acacb,Hcar1,Etfbkmt
2_Member	GO Biological Processes	GO:0019217	regulation of fatty acid metabolic process	-2.09788	-0.00944984	Fmo1,Irs1,Ppargc1a,Acacb,Fmo4,Etfbkmt
2_Member	GO Biological Processes	GO:0062014	negative regulation of small molecule metabolic process	-2.02582	0	Fmo1,Ppargc1a,Tcf7l2,Acacb,Fmo4,Etfbkmt
3_Summary	GO Biological Processes	GO:0019626	short-chain fatty acid catabolic process	-4.13707	-0.714759	Pck1,Ces1d,Ces1f,Igf1r,Por,Ppargc1a,Ephx2,Fmo5,Rorc,Pon1,Abca8a,Osbpl6,Mecp2,Myc,Slc16a7,Slco2b1,Slc2a13
3_Member	GO Biological Processes	GO:0019626	short-chain fatty acid catabolic process	-4.13707	-0.714759	Pck1,Ces1d,Ces1f
3_Member	GO Biological Processes	GO:0045940	positive regulation of steroid metabolic process	-3.47394	-0.390139	Igf1r,Por,Ppargc1a,Ces1d,Ces1f
3_Member	GO Biological Processes	GO:0019218	regulation of steroid metabolic process	-3.34455	-0.332421	Ephx2,Fmo5,Igf1r,Por,Ppargc1a,Rorc,Ces1d,Ces1f
3_Member	GO Biological Processes	GO:0090181	regulation of cholesterol metabolic process	-3.13594	-0.320968	Ephx2,Fmo5,Por,Ces1d,Ces1f
3_Member	GO Biological Processes	GO:0046459	short-chain fatty acid metabolic process	-2.82549	-0.26565	Pck1,Ces1d,Ces1f
3_Member	GO Biological Processes	GO:0010875	positive regulation of cholesterol efflux	-2.77658	-0.257378	Pon1,Ces1d,Abca8a,Ces1f
3_Member	GO Biological Processes	GO:0090205	positive regulation of cholesterol metabolic process	-2.33107	-0.0886623	Por,Ces1d,Ces1f
3_Member	GO Biological Processes	GO:0010874	regulation of cholesterol efflux	-2.31409	-0.0816791	Pon1,Ces1d,Abca8a,Ces1f
3_Member	GO Biological Processes	GO:0032371	regulation of sterol transport	-2.29571	-0.0783223	Pon1,Osbpl6,Ces1d,Abca8a,Ces1f
3_Member	GO Biological Processes	GO:0032374	regulation of cholesterol transport	-2.29571	-0.0783223	Pon1,Osbpl6,Ces1d,Abca8a,Ces1f
3_Member	GO Biological Processes	GO:0032373	positive regulation of sterol transport	-2.24472	-0.074076	Pon1,Ces1d,Abca8a,Ces1f
3_Member	GO Biological Processes	GO:0032376	positive regulation of cholesterol transport	-2.24472	-0.074076	Pon1,Ces1d,Abca8a,Ces1f
3_Member	GO Biological Processes	GO:0015850	organic hydroxy compound transport	-2.1671	-0.0364092	Mecp2,Myc,Slc16a7,Slco2b1,Ces1d,Abca8a,Ces1f,Slc2a13
3_Member	GO Biological Processes	GO:0036315	cellular response to sterol	-2.12358	-0.0190539	Rorc,Ces1d,Ces1f
4_Summary	GO Biological Processes	GO:0120162	positive regulation of cold-induced thermogenesis	-3.72924	-0.473601	Adrb2,Ebf2,Igf1r,Il18,Ppargc1a,Prdm16,Elovl6,Pth2r,Bnip3,Rgs2,Plcl1,Sema5a
4_Member	GO Biological Processes	GO:0120162	positive regulation of cold-induced thermogenesis	-3.72924	-0.473601	Adrb2,Ebf2,Igf1r,Il18,Ppargc1a,Prdm16,Elovl6,Pth2r
4_Member	GO Biological Processes	GO:0050873	brown fat cell differentiation	-3.27287	-0.320968	Adrb2,Bnip3,Ebf2,Rgs2,Prdm16
4_Member	GO Biological Processes	GO:0120161	regulation of cold-induced thermogenesis	-3.22211	-0.320968	Adrb2,Ebf2,Igf1r,Il18,Ppargc1a,Prdm16,Elovl6,Pth2r,Plcl1
4_Member	GO Biological Processes	GO:0043243	positive regulation of protein-containing complex disassembly	-2.58992	-0.157962	Adrb2,Bnip3,Igf1r,Sema5a
5_Summary	GO Biological Processes	GO:0007416	synapse assembly	-3.69961	-0.473601	Cdh9,Erbb4,Grid2,Mecp2,Mapt,Nrxn1,Ntrk3,Fbxo45,Igf1r,Sema3a,Mpp2,Chrdl1,Prrt1,Abi2,Smad3,Prtn3,Cldn34c1,Ccm2,Cdh19,Adrb2,Bche,Fgf14,Gnal,Slc1a3,Snap25,Slc7a11,Gabbr1,Chrna5,Dlgap1,Plcl1
5_Member	GO Biological Processes	GO:0007416	synapse assembly	-3.69961	-0.473601	Cdh9,Erbb4,Grid2,Mecp2,Mapt,Nrxn1,Ntrk3,Fbxo45
5_Member	GO Biological Processes	GO:0050808	synapse organization	-2.94641	-0.282779	Cdh9,Erbb4,Grid2,Igf1r,Mecp2,Mapt,Nrxn1,Ntrk3,Sema3a,Mpp2,Chrdl1,Prrt1,Fbxo45,Abi2
5_Member	GO Biological Processes	GO:0034330	cell junction organization	-2.86001	-0.26565	Cdh9,Erbb4,Grid2,Igf1r,Smad3,Mecp2,Mapt,Nrxn1,Ntrk3,Prtn3,Sema3a,Mpp2,Cldn34c1,Chrdl1,Ccm2,Cdh19,Prrt1,Fbxo45,Abi2
5_Member	GO Biological Processes	GO:0034329	cell junction assembly	-2.31166	-0.0816791	Cdh9,Erbb4,Grid2,Mecp2,Mapt,Nrxn1,Ntrk3,Cldn34c1,Cdh19,Fbxo45,Abi2
5_Member	GO Biological Processes	GO:0050804	modulation of chemical synaptic transmission	-2.18957	-0.039609	Adrb2,Bche,Erbb4,Fgf14,Gnal,Grid2,Igf1r,Mecp2,Mapt,Nrxn1,Slc1a3,Snap25,Slc7a11,Mpp2,Gabbr1,Chrdl1,Chrna5,Dlgap1,Plcl1,Prrt1,Fbxo45
5_Member	GO Biological Processes	GO:0099177	regulation of trans-synaptic signaling	-2.18316	-0.039609	Adrb2,Bche,Erbb4,Fgf14,Gnal,Grid2,Igf1r,Mecp2,Mapt,Nrxn1,Slc1a3,Snap25,Slc7a11,Mpp2,Gabbr1,Chrdl1,Chrna5,Dlgap1,Plcl1,Prrt1,Fbxo45
6_Summary	GO Biological Processes	GO:0060078	regulation of postsynaptic membrane potential	-3.59402	-0.405799	Adrb2,Fgf14,Grid2,Mecp2,Rgs7,Mpp2,Gabbr1
6_Member	GO Biological Processes	GO:0060078	regulation of postsynaptic membrane potential	-3.59402	-0.405799	Adrb2,Fgf14,Grid2,Mecp2,Rgs7,Mpp2,Gabbr1
6_Member	GO Biological Processes	GO:0099565	chemical synaptic transmission, postsynaptic	-2.51961	-0.148731	Adrb2,Grid2,Mecp2,Mpp2,Gabbr1
6_Member	GO Biological Processes	GO:0060079	excitatory postsynaptic potential	-2.27894	-0.0783223	Adrb2,Grid2,Mecp2,Mpp2
7_Summary	GO Biological Processes	GO:0014068	positive regulation of phosphatidylinositol 3-kinase signaling	-3.52755	-0.396106	Angpt1,Erbb4,Igf1r,Il18,Ntrk3,Pdgfd,Prr5l,Pde3b,Adrb2,Cdc25b,Cdkn1b,Hipk3,Irs1,Mapt,Nrxn1,Pik3r1,Rgs2,Tpd52l1,Xrcc5,Socs5,Dusp16,Irak3,Errfi1,Ambra1,Abi2,Myc,Polg2,Parm1,Ppargc1a
7_Member	GO Biological Processes	GO:0014068	positive regulation of phosphatidylinositol 3-kinase signaling	-3.52755	-0.396106	Angpt1,Erbb4,Igf1r,Il18,Ntrk3,Pdgfd,Prr5l
7_Member	GO Biological Processes	GO:0014066	regulation of phosphatidylinositol 3-kinase signaling	-3.44822	-0.390139	Angpt1,Erbb4,Igf1r,Il18,Ntrk3,Pde3b,Pdgfd,Prr5l
7_Member	GO Biological Processes	GO:0043549	regulation of kinase activity	-3.09382	-0.303835	Adrb2,Angpt1,Cdc25b,Cdkn1b,Erbb4,Hipk3,Igf1r,Il18,Irs1,Mapt,Nrxn1,Ntrk3,Pik3r1,Rgs2,Tpd52l1,Xrcc5,Socs5,Dusp16,Pdgfd,Irak3,Errfi1,Ambra1,Abi2
7_Member	GO Biological Processes	GO:0051347	positive regulation of transferase activity	-2.76891	-0.257378	Adrb2,Angpt1,Cdc25b,Cdkn1b,Erbb4,Igf1r,Il18,Irs1,Myc,Nrxn1,Ntrk3,Tpd52l1,Xrcc5,Polg2,Pdgfd,Ambra1,Parm1,Abi2
7_Member	GO Biological Processes	GO:0033674	positive regulation of kinase activity	-2.43298	-0.134057	Adrb2,Angpt1,Cdc25b,Cdkn1b,Erbb4,Igf1r,Il18,Irs1,Nrxn1,Ntrk3,Tpd52l1,Xrcc5,Pdgfd,Ambra1,Abi2
7_Member	GO Biological Processes	GO:0042326	negative regulation of phosphorylation	-2.0867	-0.00126502	Angpt1,Cdkn1b,Hipk3,Il18,Mapt,Ntrk3,Ppargc1a,Rgs2,Socs5,Dusp16,Prr5l,Irak3,Errfi1
8_Summary	GO Biological Processes	GO:0008610	lipid biosynthetic process	-3.51738	-0.396106	Bmpr1b,Cish,Inpp1,Pck1,Pik3r1,Plp1,Ptdss1,Acsm3,St3gal4,St6galnac5,St3gal6,Socs5,Mogat1,Cept1,Acacb,Ces1d,Elovl6,Socs2,Abca8a,Ces1f,Cyp2e1,Mecp2,Enpp2,Pon1,Plppr3
8_Member	GO Biological Processes	GO:0008610	lipid biosynthetic process	-3.51738	-0.396106	Bmpr1b,Cish,Inpp1,Pck1,Pik3r1,Plp1,Ptdss1,Acsm3,St3gal4,St6galnac5,St3gal6,Socs5,Mogat1,Cept1,Acacb,Ces1d,Elovl6,Socs2,Abca8a,Ces1f
8_Member	GO Biological Processes	GO:0046486	glycerolipid metabolic process	-3.14445	-0.320968	Cish,Cyp2e1,Inpp1,Mecp2,Pck1,Enpp2,Pik3r1,Pon1,Ptdss1,Socs5,Mogat1,Cept1,Ces1d,Socs2
8_Member	GO Biological Processes	GO:0046854	phosphatidylinositol phosphate biosynthetic process	-2.9296	-0.282779	Cish,Inpp1,Pik3r1,Socs5,Socs2
8_Member	GO Biological Processes	GO:0045017	glycerolipid biosynthetic process	-2.61887	-0.157962	Cish,Inpp1,Pck1,Pik3r1,Ptdss1,Socs5,Mogat1,Cept1,Socs2
8_Member	GO Biological Processes	GO:0006644	phospholipid metabolic process	-2.23348	-0.0664439	Cish,Inpp1,Mecp2,Enpp2,Pik3r1,Pon1,Ptdss1,Socs5,Cept1,Plppr3,Socs2,Abca8a
8_Member	GO Biological Processes	GO:0006650	glycerophospholipid metabolic process	-2.19916	-0.0423421	Cish,Inpp1,Mecp2,Enpp2,Pik3r1,Pon1,Ptdss1,Socs5,Cept1,Socs2
9_Summary	GO Biological Processes	GO:0006749	glutathione metabolic process	-3.4271	-0.390139	Gclc,Gsr,Gsta3,Gsta4,Gstt1,Slc7a11,Nrf1,Cept1,Chdh
9_Member	GO Biological Processes	GO:0006749	glutathione metabolic process	-3.4271	-0.390139	Gclc,Gsr,Gsta3,Gsta4,Gstt1,Slc7a11
9_Member	WikiPathways	WP4466	Oxidative stress and redox pathway	-3.22259	-0.320968	Gclc,Gsr,Gsta3,Gsta4,Gstt1,Nrf1,Slc7a11
9_Member	WikiPathways	WP164	Glutathione metabolism	-2.51725	-0.148731	Gclc,Gsr,Gstt1
9_Member	KEGG Pathway	mmu00480	Glutathione metabolism - Mus musculus (house mouse)	-2.26992	-0.0783223	Gclc,Gsr,Gsta3,Gsta4,Gstt1
9_Member	WikiPathways	WP1770	One-carbon metabolism and related pathways	-2.05649	0	Gclc,Gsr,Cept1,Chdh
10_Summary	GO Biological Processes	GO:1905039	carboxylic acid transmembrane transport	-3.17369	-0.320968	Sfxn1,Myc,Slc16a2,Slc16a7,Slc1a3,Slc7a11,Slc43a1,Slc25a21,Sfxn4,Cp,Slc2a3,Slco2b1,Slc2a13
10_Member	GO Biological Processes	GO:1905039	carboxylic acid transmembrane transport	-3.17369	-0.320968	Sfxn1,Myc,Slc16a2,Slc16a7,Slc1a3,Slc7a11,Slc43a1,Slc25a21
10_Member	GO Biological Processes	GO:1903825	organic acid transmembrane transport	-3.15031	-0.320968	Sfxn1,Myc,Slc16a2,Slc16a7,Slc1a3,Slc7a11,Slc43a1,Slc25a21
10_Member	GO Biological Processes	GO:0006865	amino acid transport	-2.43339	-0.134057	Sfxn1,Myc,Slc16a2,Slc1a3,Slc7a11,Slc43a1,Sfxn4
10_Member	Reactome Gene Sets	R-MMU-425407	SLC-mediated transmembrane transport	-2.13721	-0.0190539	Cp,Slc16a2,Slc16a7,Slc1a3,Slc2a3,Slc7a11,Slc43a1,Slco2b1,Slc2a13
11_Summary	GO Biological Processes	GO:0048638	regulation of developmental growth	-3.16499	-0.320968	Adrb2,Cdkn1b,Erbb4,Igf1r,Mecp2,Mapt,Ntrk3,Rgs2,Sema3a,Sema5a,Tcf7l2,Ndel1,Acacb,Socs2,Wdr36,Arhgap32,Il18,Myc,Pck1,Enpp2,Rfx3,Vnn1,Xrcc5,Socs5,Plag1,Ambra1,Tox,Faiml,Grid2,Nrxn1,Pik3r1,Chl1,Celsr2,Fbxo45,Abi2
11_Member	GO Biological Processes	GO:0048638	regulation of developmental growth	-3.16499	-0.320968	Adrb2,Cdkn1b,Erbb4,Igf1r,Mecp2,Mapt,Ntrk3,Rgs2,Sema3a,Sema5a,Tcf7l2,Ndel1,Acacb,Socs2,Wdr36,Arhgap32
11_Member	GO Biological Processes	GO:0045773	positive regulation of axon extension	-2.7811	-0.257378	Mapt,Ntrk3,Sema5a,Ndel1,Arhgap32
11_Member	GO Biological Processes	GO:0030516	regulation of axon extension	-2.6988	-0.216718	Mapt,Ntrk3,Sema3a,Sema5a,Ndel1,Wdr36,Arhgap32
11_Member	GO Biological Processes	GO:0048639	positive regulation of developmental growth	-2.58652	-0.157962	Adrb2,Erbb4,Igf1r,Mecp2,Mapt,Ntrk3,Sema5a,Ndel1,Acacb,Arhgap32
11_Member	GO Biological Processes	GO:0010720	positive regulation of cell development	-2.51128	-0.148731	Il18,Mecp2,Mapt,Myc,Ntrk3,Pck1,Enpp2,Rfx3,Sema5a,Vnn1,Xrcc5,Socs5,Plag1,Ndel1,Ambra1,Tox,Arhgap32,Faiml
11_Member	GO Biological Processes	GO:0051962	positive regulation of nervous system development	-2.46783	-0.138576	Grid2,Mecp2,Mapt,Myc,Nrxn1,Ntrk3,Enpp2,Pik3r1,Sema5a,Xrcc5,Plag1,Ndel1,Arhgap32,Faiml
11_Member	GO Biological Processes	GO:0001764	neuron migration	-2.41106	-0.116782	Chl1,Mapt,Ntrk3,Sema3a,Celsr2,Ndel1,Fbxo45,Abi2
11_Member	GO Biological Processes	GO:0061387	regulation of extent of cell growth	-2.39575	-0.106066	Mapt,Ntrk3,Sema3a,Sema5a,Ndel1,Wdr36,Arhgap32
12_Summary	GO Biological Processes	GO:0062013	positive regulation of small molecule metabolic process	-3.14582	-0.320968	Irs1,Myc,Por,Ppargc1a,Pth1r,Tcf7l2,Ces1d,Gpt2,Wdr5,Ces1f,Rorc,Acacb
12_Member	GO Biological Processes	GO:0062013	positive regulation of small molecule metabolic process	-3.14582	-0.320968	Irs1,Myc,Por,Ppargc1a,Pth1r,Tcf7l2,Ces1d,Gpt2,Wdr5,Ces1f
12_Member	GO Biological Processes	GO:0045913	positive regulation of carbohydrate metabolic process	-2.44694	-0.138576	Irs1,Myc,Pth1r,Tcf7l2,Gpt2,Wdr5
12_Member	GO Biological Processes	GO:0006109	regulation of carbohydrate metabolic process	-2.28051	-0.0783223	Irs1,Myc,Ppargc1a,Pth1r,Rorc,Tcf7l2,Acacb,Gpt2,Wdr5
12_Member	GO Biological Processes	GO:0045722	positive regulation of gluconeogenesis	-2.12358	-0.0190539	Tcf7l2,Gpt2,Wdr5
12_Member	GO Biological Processes	GO:0010906	regulation of glucose metabolic process	-2.00833	0	Irs1,Rorc,Tcf7l2,Acacb,Gpt2,Wdr5
13_Summary	Reactome Gene Sets	R-MMU-1475029	Reversible hydration of carbon dioxide	-3.12598	-0.320968	Car1,Car3,Car5b
13_Member	Reactome Gene Sets	R-MMU-1475029	Reversible hydration of carbon dioxide	-3.12598	-0.320968	Car1,Car3,Car5b
13_Member	KEGG Pathway	mmu00910	Nitrogen metabolism - Mus musculus (house mouse)	-2.66104	-0.192969	Car1,Car3,Car5b
14_Summary	Reactome Gene Sets	R-MMU-9748784	Drug ADME	-3.05865	-0.303835	Bche,Cyp2e1,Gsta3,Gstt1,Pon1,Slco2b1,Ces1d
14_Member	Reactome Gene Sets	R-MMU-9748784	Drug ADME	-3.05865	-0.303835	Bche,Cyp2e1,Gsta3,Gstt1,Pon1,Slco2b1,Ces1d
14_Member	Reactome Gene Sets	R-MMU-9749641	Aspirin ADME	-2.72754	-0.238282	Bche,Cyp2e1,Slco2b1,Ces1d
15_Summary	GO Biological Processes	GO:0045834	positive regulation of lipid metabolic process	-3.05735	-0.303835	Erbb4,Igf1r,Irs1,Pck1,Por,Ppargc1a,Tcf7l2,Ces1d,Ambra1,Ces1f
15_Member	GO Biological Processes	GO:0045834	positive regulation of lipid metabolic process	-3.05735	-0.303835	Erbb4,Igf1r,Irs1,Pck1,Por,Ppargc1a,Tcf7l2,Ces1d,Ambra1,Ces1f
15_Member	GO Biological Processes	GO:0046886	positive regulation of hormone biosynthetic process	-2.91737	-0.282779	Igf1r,Por,Ppargc1a
15_Member	GO Biological Processes	GO:0032352	positive regulation of hormone metabolic process	-2.17184	-0.0371787	Igf1r,Por,Ppargc1a
15_Member	GO Biological Processes	GO:0032350	regulation of hormone metabolic process	-2.05649	0	Igf1r,Por,Ppargc1a,Tcf7l2
15_Member	GO Biological Processes	GO:0046889	positive regulation of lipid biosynthetic process	-2.04352	0	Erbb4,Igf1r,Pck1,Por,Ppargc1a,Tcf7l2
16_Summary	WikiPathways	WP5298	Dravet syndrome: Scn1a-A1783V point mutation model	-3.04003	-0.303835	Slc16a7,Slc1a3,Slc2a3,Gabbr1,Prr5l,Maob
16_Member	WikiPathways	WP5298	Dravet syndrome: Scn1a-A1783V point mutation model	-3.04003	-0.303835	Slc16a7,Slc1a3,Slc2a3,Gabbr1,Prr5l,Maob
17_Summary	GO Biological Processes	GO:0048660	regulation of smooth muscle cell proliferation	-3.02285	-0.303835	Cdkn1b,Igf1r,Il18,Myc,Pde1a,Pik3r1,Ppargc1a,Tcf7l2,Xrcc5,Pdgfd,Angpt1,Sema5a,Nrxn1,Bag4,Zeb1,Ntrk3
17_Member	GO Biological Processes	GO:0048660	regulation of smooth muscle cell proliferation	-3.02285	-0.303835	Cdkn1b,Igf1r,Il18,Myc,Pde1a,Pik3r1,Ppargc1a,Tcf7l2,Xrcc5,Pdgfd
17_Member	GO Biological Processes	GO:1904036	negative regulation of epithelial cell apoptotic process	-2.91672	-0.282779	Angpt1,Cdkn1b,Igf1r,Myc,Sema5a,Tcf7l2
17_Member	GO Biological Processes	GO:0051897	positive regulation of protein kinase B signaling	-2.55121	-0.148731	Angpt1,Igf1r,Il18,Nrxn1,Sema5a,Tcf7l2,Bag4
17_Member	GO Biological Processes	GO:1904035	regulation of epithelial cell apoptotic process	-2.49136	-0.14664	Angpt1,Cdkn1b,Igf1r,Myc,Ppargc1a,Sema5a,Tcf7l2
17_Member	KEGG Pathway	mmu05215	Prostate cancer - Mus musculus (house mouse)	-2.33629	-0.0886623	Cdkn1b,Igf1r,Pik3r1,Tcf7l2,Zeb1,Pdgfd
17_Member	GO Biological Processes	GO:0051896	regulation of protein kinase B signaling	-2.15288	-0.0253516	Angpt1,Igf1r,Il18,Nrxn1,Ntrk3,Sema5a,Tcf7l2,Bag4
18_Summary	GO Biological Processes	GO:0048640	negative regulation of developmental growth	-3.01494	-0.303835	Adrb2,Cdkn1b,Mecp2,Rgs2,Sema3a,Sema5a,Tcf7l2,Socs2
18_Member	GO Biological Processes	GO:0048640	negative regulation of developmental growth	-3.01494	-0.303835	Adrb2,Cdkn1b,Mecp2,Rgs2,Sema3a,Sema5a,Tcf7l2,Socs2
19_Summary	KEGG Pathway	mmu04068	FoxO signaling pathway - Mus musculus (house mouse)	-2.97161	-0.282779	Bnip3,Cdkn1b,Igf1r,Irs1,Smad3,Pck1,Pik3r1,Fbxo32,Ppargc1a,Erbb4,Pde1a,Ambra1,Hoxa3,Hoxa5,Pde3b,Rfx3,Tcf7l2,Gsta3,Gsta4,Gstt1,Myc,Bmpr1b,Rif1,Acvr1c
19_Member	KEGG Pathway	mmu04068	FoxO signaling pathway - Mus musculus (house mouse)	-2.97161	-0.282779	Bnip3,Cdkn1b,Igf1r,Irs1,Smad3,Pck1,Pik3r1,Fbxo32
19_Member	WikiPathways	WP3675	Factors and pathways affecting insulin-like growth factor (IGF1)-Akt signaling	-2.88005	-0.265852	Igf1r,Irs1,Smad3,Ppargc1a
19_Member	GO Biological Processes	GO:0010660	regulation of muscle cell apoptotic process	-2.83501	-0.26565	Bnip3,Erbb4,Igf1r,Pde1a,Pik3r1,Fbxo32,Ambra1
19_Member	GO Biological Processes	GO:0035270	endocrine system development	-2.25268	-0.074076	Hoxa3,Hoxa5,Igf1r,Smad3,Pde3b,Rfx3,Tcf7l2
19_Member	Reactome Gene Sets	R-MMU-2428928	IRS-related events triggered by IGF1R	-2.24472	-0.074076	Igf1r,Irs1,Pde3b,Pik3r1
19_Member	Reactome Gene Sets	R-MMU-2428924	IGF1R signaling cascade	-2.21137	-0.0502376	Igf1r,Irs1,Pde3b,Pik3r1
19_Member	KEGG Pathway	mmu05225	Hepatocellular carcinoma - Mus musculus (house mouse)	-2.21043	-0.0502376	Gsta3,Gsta4,Gstt1,Igf1r,Smad3,Myc,Pik3r1,Tcf7l2
19_Member	KEGG Pathway	mmu04550	Signaling pathways regulating pluripotency of stem cells - Mus musculus (house mouse)	-2.18532	-0.039609	Bmpr1b,Igf1r,Smad3,Myc,Pik3r1,Rif1,Acvr1c
19_Member	Reactome Gene Sets	R-MMU-2404192	Signaling by Type 1 Insulin-like Growth Factor 1 Receptor (IGF1R)	-2.17885	-0.0385511	Igf1r,Irs1,Pde3b,Pik3r1
19_Member	WikiPathways	WP512	ID signaling pathway	-2.1162	-0.0190539	Igf1r,Irs1,Smad3,Tcf7l2
20_Summary	GO Biological Processes	GO:0048680	positive regulation of axon regeneration	-2.91737	-0.282779	Igf1r,Ntrk3,Ndel1,Xylt1,Adrb2,Smad3,St3gal4,Tfpi,Abi2
20_Member	GO Biological Processes	GO:0048680	positive regulation of axon regeneration	-2.91737	-0.282779	Igf1r,Ntrk3,Ndel1
20_Member	GO Biological Processes	GO:0070572	positive regulation of neuron projection regeneration	-2.82549	-0.26565	Igf1r,Ntrk3,Ndel1
20_Member	GO Biological Processes	GO:0048679	regulation of axon regeneration	-2.72754	-0.238282	Igf1r,Ntrk3,Ndel1,Xylt1
20_Member	GO Biological Processes	GO:0070570	regulation of neuron projection regeneration	-2.50523	-0.148731	Igf1r,Ntrk3,Ndel1,Xylt1
20_Member	GO Biological Processes	GO:1903034	regulation of response to wounding	-2.1109	-0.0166824	Adrb2,Igf1r,Smad3,Ntrk3,St3gal4,Tfpi,Ndel1,Xylt1
20_Member	GO Biological Processes	GO:0070306	lens fiber cell differentiation	-2.07741	-0.00126502	Smad3,Ntrk3,Abi2
